# Supplementary material for: Oncogenic and teratogenic effects of Trp53Y217C, an inflammation-prone mouse model of the human hotspot mutant TP53Y220C
Source: eLife. 2025 Apr 14;13:RP102434. doi: 10.7554/eLife.102434 (PMC11996178; doi:10.7554/eLife.102434)
Supplement: Supplementary file 1. — Most differentially expressed genes correspond to a loss of function (LOF) in the p53Y217C mutant (categories 1 and 2, see Figure 4—figure supplement 3A), but genes corresponding to a separation of function (SOF, categories 3 and 4) or a gain of function (GOF, categories 5 and 6) were also observed. [file elife-102434-supp1.xlsx]

## Sheet: Feuil1
id	id	gene_name	chromosome	start	end	strand	WT	WT	WT	YC	YC	YC	KO	KO	KO	Mean_WT	Mean_Y217C	Mean KO	Median_WT	Median_Y217C	Median_KO	FoldChange YC vs WT	log2FoldChange (YC vs WT)	FoldChange KO vs WT	log2FoldChange (KO vs WT)	FoldChange YC vs KO	log2FoldChange (YC vs KO)	categories
LOF down	ENSMUSG00000083219.1	RP23-42C15.3	chr4	80003989	80005131	+	1298.20907688733	738.496078764168	681.92096232496	1.20578018029525	1.27724085148236	1.16652903957612	1.39429717731686	1.16652903957612	1.13595275610055	906.208705992153	1.21651669045124	1.23225965766451	738.496078764168	1.20578018029525	1.16652903957612	0.00134242441328055	-9.54094342673468	0.00135979675489366	-9.52239325275953	0.987224310140036	-0.0185501739751438	1
LOF down	ENSMUSG00000112768.1	RP23-123J19.2	chr12	45572431	45573287	-	356.073532779348	353.770576653493	423.606725809419	1.20578018029525	1.27724085148236	1.16652903957612	1.39429717731686	1.16652903957612	1.13595275610055	377.816945080753	1.21651669045124	1.23225965766451	356.073532779348	1.20578018029525	1.16652903957612	0.00321985741055428	-8.27878748378837	0.00326152565073843	-8.26023730981323	0.987224310140036	-0.0185501739751438	1
LOF down	ENSMUSG00000084116.1	RP23-344G15.1	chr4	51190107	51190463	+	197.299760785934	226.160475789198	276.203034058168	3.61734054088575	2.55448170296472	1.16652903957612	1.39429717731686	1.16652903957612	1.13595275610055	233.2210902111	2.44611709447553	1.23225965766451	226.160475789198	2.55448170296472	1.16652903957612	0.0104884043388247	-6.57506098064581	0.00528365447802825	-7.56424815932145	1.98506627987127	0.98918717867564	1
LOF down	ENSMUSG00000108578.1	RP23-144N15.3	chr7	128126835	128127181	+	121.998964509646	157.933293148881	156.705866473417	1.20578018029525	6.38620425741181	1.16652903957612	4.18289153195059	5.83264519788058	1.13595275610055	145.546041377315	2.91950449242773	3.71716316197724	156.705866473417	1.20578018029525	4.18289153195059	0.0200589755983756	-5.6396082596412	0.0255394315558253	-5.29112977517725	0.785411983603856	-0.348478484463951	1
LOF down	ENSMUSG00000076136.1	Gm24951	chr19	7959530	7959638	-	105.070878525054	165.514091220027	186.043494443326	3.61734054088575	2.55448170296472	3.49958711872835	1.39429717731686	3.49958711872835	7.95166929270383	152.209488062802	3.22380312085961	4.28185119624968	165.514091220027	3.49958711872835	3.49958711872835	0.0211800404947782	-5.56115084210832	0.0281313027902897	-5.15167982284667	0.752899382323987	-0.409471019261647	1
LOF down	ENSMUSG00000081189.1	Hspd1-ps4	chr4	106136111	106137778	-	40.8608972041875	55.5925191884061	52.2352888244723	1.20578018029525	1.27724085148236	1.16652903957612	5.57718870926745	2.33305807915223	2.27190551220109	49.562901739022	1.21651669045124	3.39405076687359	52.2352888244723	1.20578018029525	2.33305807915223	0.0245449045105737	-5.3484326357165	0.0684796621623423	-3.86818060541177	0.358426191595192	-1.48025203030473	1
LOF down	ENSMUSG00000109069.1	RP24-374O12.1	chr8	5993981	5994723	-	55.4540747771116	43.5895889090912	35.0620431835499	1.20578018029525	1.27724085148236	1.16652903957612	1.39429717731686	1.16652903957612	1.13595275610055	44.7019022899176	1.21651669045124	1.23225965766451	43.5895889090912	1.20578018029525	1.16652903957612	0.0272139803483403	-5.19950820750379	0.0275661570210726	-5.18095803352864	0.987224310140036	-0.0185501739751438	1
LOF down	ENSMUSG00000109560.1	RP23-308M1.5	chr7	100524016	100524628	+	42.0283514100215	59.3829182239793	69.4085344653947	2.4115603605905	1.27724085148236	1.16652903957612	1.39429717731686	1.16652903957612	1.13595275610055	56.9399346997985	1.61844341721633	1.23225965766451	59.3829182239793	1.27724085148236	1.16652903957612	0.0284236964048021	-5.13676200542251	0.0216413956946261	-5.53006264547205	1.31339479236361	0.39330064004955	1
LOF down	ENSMUSG00000101199.1	RP24-160J12.4	chr1	150145968	150146569	+	80.5543402025411	108.65810568643	135.954861323969	4.823120721181	2.55448170296472	2.33305807915223	1.39429717731686	3.49958711872835	2.27190551220109	108.389102404313	3.23688683443265	2.38859660274877	108.65810568643	2.55448170296472	2.27190551220109	0.0298635818789089	-5.0654689751052	0.0220372394434896	-5.50391267778152	1.3551416889347	0.438443702676314	1
LOF down	ENSMUSG00000104265.1	RP24-179K8.4	chr3	87022937	87023883	-	28.0189009400143	38.535723528327	48.6575293159468	1.20578018029525	1.27724085148236	1.16652903957612	4.18289153195059	1.16652903957612	2.27190551220109	38.4040512614294	1.21651669045124	2.54044202790927	38.535723528327	1.20578018029525	2.27190551220109	0.031676780196183	-4.98043049043905	0.0661503655074205	-3.91810706177741	0.478860244432506	-1.06232342866165	1
LOF down	ENSMUSG00000018554.13	Ybx2	chr11	69935796	69941605	+	428.455693541052	946.336292548095	933.07967982345	40.9965261300385	16.6041310692707	22.1640517519462	29.2802407236541	36.1624002268596	29.5347716586142	769.290555304199	26.5882363170851	31.659137536376	933.07967982345	22.1640517519462	29.5347716586142	0.0345620209864287	-4.85466860937256	0.0411536802552542	-4.60283473729085	0.839828194515267	-0.251833872081706	1
LOF down	ENSMUSG00000106936.1	RP23-380O16.6	chr6	39828200	39828773	-	23.3490841166786	29.6914591119896	40.0709064954856	1.20578018029525	1.27724085148236	1.16652903957612	1.39429717731686	1.16652903957612	1.13595275610055	31.0371499080513	1.21651669045124	1.23225965766451	29.6914591119896	1.20578018029525	1.16652903957612	0.0391955026171933	-4.67316806411032	0.0397027324130961	-4.65461789013518	0.987224310140036	-0.0185501739751438	1
LOF down	ENSMUSG00000083655.1	RP23-358M10.1	chr11	30705152	30705901	-	60.7076187033643	28.4279927667986	22.8976608545632	1.20578018029525	1.27724085148236	2.33305807915223	1.39429717731686	2.33305807915223	1.13595275610055	37.344424108242	1.60535970364328	1.62110267085655	28.4279927667986	1.27724085148236	1.39429717731686	0.0429879357354709	-4.53992435546425	0.0434094971221892	-4.52584548000416	0.990288729087746	-0.0140788754600933	1
LOF down	ENSMUSG00000112195.1	RP23-257F18.1	chr10	130535562	130535961	-	56.6215289829456	46.1165215994733	58.6752559398182	2.4115603605905	3.83172255444709	1.16652903957612	5.57718870926745	9.33223231660893	3.40785826830164	53.8044355074124	2.46993731820457	6.10575976472601	56.6215289829456	2.4115603605905	5.57718870926745	0.0459058309024411	-4.44517877513872	0.11348060261472	-3.13948237801547	0.404525794230197	-1.30569639712326	1
LOF down	ENSMUSG00000112978.1	RP23-118M14.5	chr13	100392732	100394499	+	22.1816299108447	24.6375937312254	21.466557051153	1.20578018029525	1.27724085148236	1.16652903957612	1.39429717731686	2.33305807915223	1.13595275610055	22.761926897741	1.21651669045124	1.62110267085655	22.1816299108447	1.20578018029525	1.39429717731686	0.0534452419567332	-4.22579467421387	0.071219922554862	-3.81157532287152	0.750425443323999	-0.414219351342346	1
LOF down	ENSMUSG00000086159.1	RP23-275J10.1	chr4	140679753	140684617	+	18.0955401904259	25.9010600764165	24.3287646579734	1.20578018029525	1.27724085148236	1.16652903957612	4.18289153195059	2.33305807915223	2.27190551220109	22.7751216416053	1.21651669045124	2.9292850411013	24.3287646579734	1.20578018029525	2.33305807915223	0.0534142785094473	-4.22663074034824	0.128617756128693	-2.95883826940273	0.41529474714208	-1.2677924709455	1
LOF down	ENSMUSG00000090460.3	RP24-443B5.6	chr7	127286044	127286385	-	155.271409375913	256.483668073783	242.572094678029	14.469362163543	11.4951676633413	9.33223231660893	11.1543774185349	13.9983484749134	9.08762204880438	218.109057375908	11.7655873811644	11.4134493140842	242.572094678029	11.4951676633413	11.1543774185349	0.0539435983205712	-4.21240442967513	0.052329093763462	-4.2562429152341	1.03085290497112	0.0438384855589751	1
LOF down	ENSMUSG00000112828.1	RP24-444L19.10	chr10	79793781	79794656	-	21.5979028079277	20.2154615230568	24.3287646579734	1.20578018029525	1.27724085148236	1.16652903957612	1.39429717731686	1.16652903957612	1.13595275610055	22.0473763296526	1.21651669045124	1.23225965766451	21.5979028079277	1.20578018029525	1.16652903957612	0.0551773903734336	-4.17977896404286	0.055891442103575	-4.16122879006771	0.987224310140036	-0.0185501739751438	1
LOF down	ENSMUSG00000084338.5	RP23-382H2.1	chr2	57425167	57425709	-	26.2677196312634	10.7394639341239	22.8976608545632	1.20578018029525	1.27724085148236	1.16652903957612	1.39429717731686	1.16652903957612	4.54381102440219	19.9682814733168	1.21651669045124	2.36821241376506	22.8976608545632	1.20578018029525	1.39429717731686	0.0609224530451881	-4.03688215660221	0.118598709504854	-3.07583978315755	0.513685631989906	-0.96104237344466	1
LOF down	ENSMUSG00000106710.1	RP23-445H19.1	chr5	131130021	131134711	-	20.4304486020938	17.0567956600791	21.466557051153	1.20578018029525	1.27724085148236	1.16652903957612	1.39429717731686	1.16652903957612	2.27190551220109	19.651267104442	1.21651669045124	1.61091057636469	20.4304486020938	1.20578018029525	1.39429717731686	0.0619052544543686	-4.01379432066579	0.0819748959597908	-3.60867402418279	0.755173321412125	-0.405120296483005	1
LOF down	ENSMUSG00000104602.1	RP24-207A18.2	chr5	110876603	110877273	+	8.75590654375447	26.532793249012	17.1732456409224	1.20578018029525	1.27724085148236	1.16652903957612	1.39429717731686	1.16652903957612	1.13595275610055	17.487315144563	1.21651669045124	1.23225965766451	17.1732456409224	1.20578018029525	1.16652903957612	0.0695656640481758	-3.84548078787284	0.0704659147203415	-3.8269306138977	0.987224310140036	-0.0185501739751438	1
LOF down	ENSMUSG00000081274.2	AC110234.4	chr5	117348907	117349343	-	14.0094504700072	17.6885288326747	16.4576937392173	1.20578018029525	1.27724085148236	1.16652903957612	1.39429717731686	2.33305807915223	1.13595275610055	16.0518910139664	1.21651669045124	1.62110267085655	16.4576937392173	1.20578018029525	1.39429717731686	0.0757865032470491	-3.72191524681762	0.100991382849912	-3.30769589547528	0.750425443323999	-0.414219351342346	1
LOF down	ENSMUSG00000116403.1	RP24-160I18.2	chr16	12381130	12381502	-	9.33963364667143	21.4789278682478	16.4576937392173	1.20578018029525	1.27724085148236	1.16652903957612	1.39429717731686	1.16652903957612	2.27190551220109	15.7587517513788	1.21651669045124	1.61091057636469	16.4576937392173	1.20578018029525	1.39429717731686	0.0771962595543014	-3.69532524452481	0.102223234541641	-3.29020494804181	0.755173321412125	-0.405120296483005	1
LOF down	ENSMUSG00000063816.3	RP23-263F7.2	chrX	46455887	46456294	-	129.587416847566	123.819701828723	133.808205618854	14.469362163543	7.66344510889417	8.16570327703282	4.18289153195059	9.33223231660893	7.95166929270383	129.071774765048	10.09950351649	7.15559771375445	129.587416847566	8.16570327703282	7.95166929270383	0.0782471887046905	-3.67581727050468	0.0554389038717408	-4.17295745673028	1.41141298330352	0.497140186225598	1
LOF down	ENSMUSG00000100843.1	RP24-350F5.1	chr1	45768337	45769486	+	26.8514467341804	13.8981297971015	17.1732456409224	2.4115603605905	1.27724085148236	1.16652903957612	1.39429717731686	1.16652903957612	2.27190551220109	19.3076073907348	1.61844341721633	1.61091057636469	17.1732456409224	1.27724085148236	1.39429717731686	0.0838241313106966	-3.57649056266821	0.0834339824590449	-3.5832210802099	1.00467613842889	0.00673051754168815	1
LOF down	ENSMUSG00000080808.1	RP23-343K11.1	chr4	89442217	89444644	-	12.8419962641732	12.002930279315	17.8887975426275	1.20578018029525	1.27724085148236	1.16652903957612	1.39429717731686	1.16652903957612	1.13595275610055	14.2445746953719	1.21651669045124	1.23225965766451	12.8419962641732	1.20578018029525	1.16652903957612	0.0854021068699575	-3.5495845282036	0.0865072972705092	-3.53103435422845	0.987224310140036	-0.0185501739751438	1
LOF down	ENSMUSG00000045204.4	Olfr835	chr9	19032735	19037670	+	15.1769046758411	12.6346634519105	14.311038034102	1.20578018029525	1.27724085148236	1.16652903957612	1.39429717731686	1.16652903957612	1.13595275610055	14.0408687206179	1.21651669045124	1.23225965766451	14.311038034102	1.20578018029525	1.16652903957612	0.0866411270311849	-3.52880418007264	0.0877623516168225	-3.5102540060975	0.987224310140036	-0.0185501739751438	1
LOF down	ENSMUSG00000089657.1	RP23-158A6.2	chr1	177786856	177787465	+	72.9658878646206	111.185038376812	116.634959977931	9.646241442362	5.10896340592945	11.6652903957612	4.18289153195059	10.498761356185	9.08762204880438	100.261962073121	8.80683174801755	7.92309164564666	111.185038376812	9.646241442362	9.08762204880438	0.087838214672028	-3.50900745817737	0.0790239037998113	-3.66156707221749	1.11153980565862	0.152559614040124	1
LOF down	ENSMUSG00000082398.1	RP23-447J12.3	chr4	32051738	32052914	+	40.2771701012706	45.4847884268777	42.2175622006009	4.823120721181	5.10896340592945	2.33305807915223	2.78859435463373	3.49958711872835	1.13595275610055	42.6598402429164	4.08838073542089	2.47471140982088	42.2175622006009	4.823120721181	2.78859435463373	0.0958367568218862	-3.38327710255943	0.0580103299902019	-4.10754636369563	1.65206363828775	0.724269261136193	1
LOF down	ENSMUSG00000098973.1	Mir6236	chr9	110281287	110281409	+	278.437828091392	494.0153409697	537.37947818053	47.0254270315147	40.8717072474356	44.3281035038924	19.5201604824361	34.9958711872835	47.710015756223	436.610882413874	44.0750792609476	34.0753491419809	494.0153409697	44.3281035038924	34.9958711872835	0.100948192168897	-3.30831302049654	0.0780451209864257	-3.67954774525513	1.29345935906045	0.371234724758591	1
LOF down	ENSMUSG00000112478.1	RP23-281M13.2	chr10	17318085	17323228	-	390.513431851449	209.103680129118	188.905702050146	12.0578018029525	15.3268902177883	52.4938067809252	19.5201604824361	55.9933938996536	24.990960634212	262.840938010238	26.626166267222	33.5015050054339	209.103680129118	15.3268902177883	24.990960634212	0.101301442875633	-3.30327337173848	0.127459235456423	-2.97189218277122	0.794775227647333	-0.331381188967257	1
LOF down	ENSMUSG00000111960.1	RP23-7A5.1	chr12	43955679	43961097	-	106.822059833805	56.2242523610016	44.3642179057162	2.4115603605905	5.10896340592945	13.9983484749134	5.57718870926745	15.1648775144895	4.54381102440219	69.1368433668409	7.17295741381112	8.42862574938638	56.2242523610016	5.10896340592945	5.57718870926745	0.103750143404021	-3.26881476432537	0.121912215526879	-3.03608540455598	0.851023360994919	-0.232729359769383	1
LOF down	ENSMUSG00000081483.1	RP23-423O7.3	chr4	46273819	46274840	-	281.940190708894	210.998879646905	198.207876772313	14.469362163543	26.8220578811296	31.4962840685551	23.7030520143867	6.9991742374567	7.95166929270383	230.382315709371	24.2625680377426	12.8846318481824	210.998879646905	26.8220578811296	7.95166929270383	0.105314368262319	-3.24722581515547	0.0559271739608542	-4.16030675799707	1.88306257591405	0.9130809428416	1
LOF down	ENSMUSG00000110631.1	RP24-286J21.7	chr8	121833247	121841178	+	8283.08759039173	7287.04214588937	6299.7189426117	400.319019858023	369.122606078403	1654.13817811893	488.004012060902	1858.28076004475	486.187779611034	7289.94955963093	807.859934685119	944.157517238895	7287.04214588937	400.319019858023	488.004012060902	0.110818316104511	-3.17373174446331	0.129514958850647	-2.94880935749057	0.8556410555811	-0.224922386972741	1
LOF down	ENSMUSG00000112324.1	RP23-356G7.6	chr10	25899279	25903916	+	471.06777205399	496.542273660082	419.313414399189	25.3213837862002	28.099298732612	103.821084522274	32.0688350782878	118.985962036764	24.990960634212	462.307820037754	52.4139223470287	58.6819192497546	471.06777205399	28.099298732612	32.0688350782878	0.113374509526463	-3.14083178541489	0.126932568964467	-2.97786580462936	0.893186913740009	-0.162965980785525	1
LOF down	ENSMUSG00000069830.10	Nlrp1a	chr11	71092236	71144704	-	10.5070878525054	14.5298629696971	17.1732456409224	1.20578018029525	1.27724085148236	2.33305807915223	1.39429717731686	1.16652903957612	1.13595275610055	14.0700654877083	1.60535970364328	1.23225965766451	14.5298629696971	1.27724085148236	1.16652903957612	0.114097528902458	-3.13166054847351	0.0875802361219299	-3.51325085038062	1.30277713277241	0.381590301907109	1
LOF down	ENSMUSG00000106334.1	WI1-49P9.2	chr3	55578105	55582730	-	767.601140335809	773.241403256921	691.223137047126	59.0832288344672	49.8123932078121	162.14753650108	62.7433729792588	187.811175371755	55.6616850489268	744.021893546619	90.3477195144531	102.07207779998	767.601140335809	59.0832288344672	62.7433729792588	0.121431533531603	-3.04178498332447	0.137189615904205	-2.86575680907972	0.885136478670474	-0.176028174244749	1
LOF down	ENSMUSG00000081979.1	Rps8-ps3	chr6	52118242	52118891	+	17.5118130875089	28.4279927667986	30.7687317733193	4.823120721181	3.83172255444709	1.16652903957612	2.78859435463373	8.16570327703282	6.81571653660328	25.5695125425423	3.27379077173474	5.92333805608994	28.4279927667986	3.83172255444709	6.81571653660328	0.128034930907965	-2.96539063018824	0.23165627605277	-2.10994232636226	0.55269355568333	-0.855448303825976	1
LOF down	ENSMUSG00000094443.2	Sgol2b	chr8	63924694	63952248	-	18.6792672933429	14.5298629696971	13.5954861323969	2.4115603605905	2.55448170296472	1.16652903957612	1.39429717731686	1.16652903957612	1.13595275610055	15.601538798479	2.04419036771045	1.23225965766451	14.5298629696971	2.4115603605905	1.16652903957612	0.131024919664318	-2.93208687047498	0.078983212719033	-3.66231013775832	1.6588957976477	0.730223267283335	1
LOF down	ENSMUSG00000020890.11	Gucy2e	chr11	69218117	69237036	-	28.6026280429313	54.9607860158106	41.5020102988958	8.44046126206675	2.55448170296472	6.9991742374567	2.78859435463373	3.49958711872835	13.6314330732066	41.6884747858792	5.99803906749606	6.63987151552289	41.5020102988958	6.9991742374567	3.49958711872835	0.143877632806267	-2.7970857665174	0.159273553413184	-2.65042136052348	0.903336616299526	-0.146664405993922	1
LOF down	ENSMUSG00000087569.1	RP23-342I1.3	chrX	152489661	152491860	-	754.175416968718	1003.19227808169	946.675165955847	132.635819832477	145.605457068989	128.318194353373	167.315661278024	152.815304184471	181.752440976087	901.347620335418	135.519823751613	167.294468812861	946.675165955847	132.635819832477	167.315661278024	0.150352450812686	-2.73357971020464	0.185604826637924	-2.42969386677072	0.810067569557297	-0.303885843433919	1
LOF down	ENSMUSG00000103755.1	RP24-324I23.4	chr9	95407461	95408554	+	21.5979028079277	31.5866586297762	48.6575293159468	4.823120721181	7.66344510889417	3.49958711872835	2.78859435463373	3.49958711872835	7.95166929270383	33.9473635845502	5.32871764960117	4.74661692202197	31.5866586297762	4.823120721181	3.49958711872835	0.156969999638685	-2.67143923964456	0.139822843980208	-2.83832801024985	1.12263486545092	0.166888770605297	1
LOF down	ENSMUSG00000110866.1	RP23-212C9.3	chr9	25855315	25859652	-	321.049906604331	288.070326703559	259.745340318951	43.408086490629	20.4358536237178	78.1574456515998	44.6175096741396	88.6562070077849	24.990960634212	289.621857875614	47.3337952553155	52.7548924387122	288.070326703559	43.408086490629	44.6175096741396	0.163433090314766	-2.61322797921402	0.18215093579494	-2.45679368798536	0.897239915905533	-0.15643429122866	1
LOF down	ENSMUSG00000081896.1	RP23-80H12.1	chrX	57659732	57660907	+	89.8939738492126	100.445574442688	114.488304272816	19.292482884724	14.049649366306	18.6644646332179	20.9144576597529	17.4979355936417	23.8550078781115	101.609284188239	17.3355322947493	20.7558003771687	100.445574442688	18.6644646332179	20.9144576597529	0.170609727577983	-2.55122818839279	0.204270707573503	-2.29144575850268	0.835213866954431	-0.259782429890112	1
LOF down	ENSMUSG00000113923.1	RP23-20A5.8	chr13	73988966	73989133	-	18.0955401904259	27.7962595942031	32.1998355767295	6.02890090147625	3.83172255444709	3.49958711872835	1.39429717731686	4.66611615830447	3.40785826830164	26.0305451204528	4.4534035248839	3.15609053464099	27.7962595942031	3.83172255444709	3.40785826830164	0.171083759647613	-2.54722527829716	0.121245656594459	-3.04399502859272	1.4110506260843	0.496769750295561	1
LOF down	ENSMUSG00000078291.1	RP24-194N4.2	chr1	52090635	52091066	-	114.410512171725	149.089028732544	140.2481727342	33.761845048267	20.4358536237178	19.830993672794	23.7030520143867	32.6628131081313	24.990960634212	134.582571212823	24.6762307815929	27.11894191891	140.2481727342	20.4358536237178	24.990960634212	0.183353836676006	-2.44729764015201	0.20150411509099	-2.31111879330165	0.9099260161174	-0.136178846850364	1
LOF down	ENSMUSG00000116140.1	RP23-310H3.4	chr16	15609107	15609515	+	40.2771701012706	41.6943893913046	52.9508407261774	10.8520216226572	5.10896340592945	9.33223231660893	8.36578306390118	9.33223231660893	7.95166929270383	44.9741334062509	8.43107244839853	8.54989489107131	41.6943893913046	9.33223231660893	8.36578306390118	0.187464922831102	-2.41530742136853	0.190106940223622	-2.3951168935509	0.986102467435375	-0.020190527817626	1
LOF down	ENSMUSG00000104896.1	Rnu3b4	chr11	87462286	87462501	+	37.9422616896027	44.8530552542822	171.016904507519	26.5271639664955	7.66344510889417	13.9983484749134	15.3372689504855	13.9983484749134	27.2628661464131	84.6040738171346	16.062985850101	18.866161190604	44.8530552542822	13.9983484749134	15.3372689504855	0.189860666577593	-2.39698704148573	0.222993531391666	-2.16492623391003	0.85141782092379	-0.232060807575699	1
LOF down	ENSMUSG00000030543.10	Mesp2	chr7	79810727	79813439	+	27.4351738370973	30.3231922845852	37.2086988886652	7.2346810817715	5.10896340592945	6.9991742374567	6.97148588658431	4.66611615830447	6.81571653660328	31.6556883367826	6.44760624171922	6.15110619383069	30.3231922845852	6.9991742374567	6.81571653660328	0.203679230510599	-2.29562922095101	0.194312823919338	-2.36354697834742	1.04820271972965	0.0679177573964106	1
LOF down	ENSMUSG00000109492.1	RP24-252O10.1	chr7	99090232	99090882	+	43.1958056158554	58.7511850513837	37.9242507903703	10.8520216226572	8.94068596037653	9.33223231660893	8.36578306390118	8.16570327703282	13.6314330732066	46.6237471525365	9.70831329988089	10.0543064713802	43.1958056158554	9.33223231660893	8.36578306390118	0.208226791984752	-2.26377238659219	0.215647756463805	-2.21325138811418	0.965587564643649	-0.0505209984780053	1
LOF down	ENSMUSG00000070390.12	Nlrp1b	chr11	71153102	71230733	-	36.1910803808518	30.9549254571807	36.4931469869601	8.44046126206675	10.2179268118589	4.66611615830447	6.97148588658431	17.4979355936417	10.2235748049049	34.5463842749975	7.77483474407671	11.5643320950436	36.1910803808518	8.44046126206675	10.2235748049049	0.225054948795427	-2.15165080599539	0.334747972551592	-1.57885277719773	0.672311611269701	-0.572798028797655	1
LOF down	ENSMUSG00000006586.15	Runx1t1	chr4	13743436	13893649	+	37.3585345866857	41.6943893913046	37.9242507903703	9.646241442362	10.2179268118589	6.9991742374567	5.57718870926745	4.66611615830447	6.81571653660328	38.9923915894535	8.95444749722587	5.6863404680584	37.9242507903703	9.646241442362	5.57718870926745	0.229646018933802	-2.12251632118805	0.145832051748178	-2.77762025714131	1.57472939714483	0.655103935953257	1
LOF down	ENSMUSG00000116691.1	RP23-367H6.1	chr17	5481123	5482964	-	40.2771701012706	24.0058605586299	25.0443165596785	6.02890090147625	10.2179268118589	4.66611615830447	11.1543774185349	4.66611615830447	6.81571653660328	29.7757824065263	6.97098129054654	7.54540337114755	25.0443165596785	6.02890090147625	6.81571653660328	0.234115805770351	-2.09470575703401	0.253407392226702	-1.98046948448421	0.923871256134893	-0.114236272549796	1
LOF down	ENSMUSG00000078917.3	RP23-38E20.13	chr13	21953053	21953628	-	19.8467214991768	27.7962595942031	20.7510051494479	3.61734054088575	10.2179268118589	3.49958711872835	4.18289153195059	5.83264519788058	6.81571653660328	22.7979954142759	5.77828482382433	5.61041775547815	20.7510051494479	3.61734054088575	5.83264519788058	0.253455828849146	-1.98019375220653	0.246092590753174	-2.02272687246132	1.02992060050827	0.0425331202547917	1
LOF down	ENSMUSG00000104074.1	RP24-363G13.1	chr3	86864492	86865320	+	28.0189009400143	27.7962595942031	34.3464912818448	6.02890090147625	8.94068596037653	8.16570327703282	6.97148588658431	12.8318194353373	10.2235748049049	30.0538839386874	7.71176337962853	10.0089600422755	28.0189009400143	8.16570327703282	10.2235748049049	0.256597895811444	-1.96241875499306	0.333033828928556	-1.58625936399133	0.770485979268161	-0.37615939100173	1
LOF down	ENSMUSG00000098943.1	Rnu3b1	chr11	87443237	87443452	+	28.0189009400143	49.2751874624509	173.879112114339	30.1445045073812	20.4358536237178	13.9983484749134	18.1258633051192	10.498761356185	23.8550078781115	83.7244001722681	21.5262355353375	17.4932108464719	49.2751874624509	20.4358536237178	18.1258633051192	0.257108268211488	-1.95955208908799	0.208938025360332	-2.25885301748241	1.23054799512	0.299300928394419	1
LOF down	ENSMUSG00000081608.1	RP24-271F24.1	chr10	39752259	39752868	-	84.0567028200429	68.2271826403166	101.608370042124	24.115603605905	19.1586127722354	22.1640517519462	36.2517266102384	37.3289292664357	32.9426299269159	84.6307518341612	21.8127560433622	35.50776193453	84.0567028200429	22.1640517519462	36.2517266102384	0.257740307992366	-1.95600991704857	0.419560988942997	-1.25304755347104	0.614309515862505	-0.702962363577527	1
LOF down	ENSMUSG00000105115.1	Rnu3b2	chr11	87471368	87471583	+	27.4351738370973	49.9069206350464	186.759046345031	30.1445045073812	17.8813719207531	20.9975227123701	16.7315661278024	18.6644646332179	24.990960634212	88.0337136057249	23.0077997135015	20.1289971317441	49.9069206350464	20.9975227123701	18.6644646332179	0.261352143072665	-1.93593310552401	0.228651005476101	-2.12878083158244	1.14301768552679	0.192847726058427	1
LOF down	ENSMUSG00000096659.1	Gm25679	chr12	54719163	54719326	-	32.68871776335	38.535723528327	57.9597040381131	7.2346810817715	15.3268902177883	11.6652903957612	8.36578306390118	13.9983484749134	11.3595275610055	43.0613817765967	11.4089538984403	11.24121969994	38.535723528327	11.6652903957612	11.3595275610055	0.264946302875979	-1.916228099077	0.261051067944352	-1.93759603421007	1.01492135221779	0.0213679351330698	1
LOF down	ENSMUSG00000102914.1	RP24-372I24.3	chr3	65968902	65969151	-	25.6839925283464	46.1165215994733	40.0709064954856	13.2635819832477	6.38620425741181	10.498761356185	6.97148588658431	6.9991742374567	11.3595275610055	37.2904735411018	10.0495158656148	8.4433958950155	40.0709064954856	10.498761356185	6.9991742374567	0.269492846598963	-1.89168111620705	0.226422329705981	-2.14291185152536	1.19022203750359	0.251230735318303	1
LOF down	ENSMUSG00000101687.1	RP24-304A3.1	chr1	115219190	115219763	-	68.8797981442018	79.598379747036	93.021747221663	27.7329441467907	17.8813719207531	20.9975227123701	20.9144576597529	13.9983484749134	20.4471496098098	80.4999750376336	22.2039462599713	18.453318581492	79.598379747036	20.9975227123701	20.4471496098098	0.275825504909672	-1.8581722293863	0.229233842282127	-2.12510804691638	1.2032494947679	0.266935817530082	1
LOF down	ENSMUSG00000099979.1	RP23-472J11.2	chr7	41191113	41192136	+	50.7842579537759	46.1165215994733	36.4931469869601	8.44046126206675	8.94068596037653	20.9975227123701	15.3372689504855	16.3314065540656	12.495480317106	44.4646421800698	12.7928899782711	14.7213852738857	46.1165215994733	8.94068596037653	15.3372689504855	0.287709275303811	-1.79731636279483	0.331080709348072	-1.5947451413516	0.869000419475772	-0.202571221443234	1
LOF down	ENSMUSG00000096349.1	Gm22513	chr12	54696782	54696945	+	40.2771701012706	36.6405240105404	52.2352888244723	16.8809225241335	12.7724085148236	9.33223231660893	15.3372689504855	10.498761356185	7.95166929270383	43.0509943120944	12.9951877851887	11.2625665331248	40.2771701012706	12.7724085148236	10.498761356185	0.301855694458093	-1.72806907727504	0.261609905022815	-1.93451092998114	1.15383893599812	0.206441852706104	1
LOF down	ENSMUSG00000080972.1	AC083948.7	chr5	135698163	135699019	-	56.6215289829456	81.4935792648226	90.1595396148426	19.292482884724	19.1586127722354	30.329755028979	16.7315661278024	13.9983484749134	14.7673858293071	76.0915492875369	22.9269502286461	15.1657668106743	81.4935792648226	19.292482884724	14.7673858293071	0.301307444037039	-1.73069177860067	0.199309475923081	-2.32691779192439	1.51175674233031	0.596226013323722	1
LOF down	ENSMUSG00000086167.3	RP24-188M1.2	chr5	115053469	115053840	-	153.520228067162	186.993019088275	203.216740084248	68.7294702768292	60.030320019671	45.4946325434685	59.9547786246251	74.6578585328715	56.7976378050273	181.243329079895	58.0848076133229	63.803424987508	186.993019088275	60.030320019671	59.9547786246251	0.320479699353338	-1.64169512203665	0.352031853042064	-1.50622212015345	0.910371310391179	-0.135473001883198	1
LOF down	ENSMUSG00000106813.1	RP23-146B9.1	chr5	42499981	42500414	-	35.6073532779348	30.3231922845852	32.1998355767295	8.44046126206675	12.7724085148236	10.498761356185	9.76008024121804	10.498761356185	12.495480317106	32.7101270464165	10.5705437110251	10.9181073048363	32.1998355767295	10.498761356185	10.498761356185	0.323158136806538	-1.62968777716087	0.333783702195448	-1.58301458157639	0.968166314535371	-0.0466731955844774	1
LOF down	ENSMUSG00000082487.1	RP23-226P4.9	chr11	102492439	102492609	-	478.656224391911	725.861415312257	863.671145358055	266.47741984525	247.784725187578	160.981007461504	241.213411675817	237.971924073528	181.752440976087	689.396261687408	225.081050831444	220.312592241811	725.861415312257	247.784725187578	237.971924073528	0.326490094797616	-1.61488887157853	0.319573233110607	-1.6457815191489	1.02164405829513	0.0308926475703749	1
LOF down	ENSMUSG00000109055.1	RP24-137M22.6	chr8	4713207	4713812	+	42.6120785129384	61.2781177417658	59.3908078415233	16.8809225241335	25.5448170296472	13.9983484749134	33.4631322556047	10.498761356185	21.5831023659104	54.4270013654092	18.808029342898	21.8483319925667	59.3908078415233	16.8809225241335	21.5831023659104	0.345564313136152	-1.53297385863564	0.40142450336153	-1.31679941192072	0.860845091025574	-0.216174446714912	1
LOF down	ENSMUSG00000093815.1	Gm26444	chr12	54729602	54729765	+	33.8561719691839	40.4309230461135	65.8307749568692	21.7040432453145	16.6041310692707	10.498761356185	6.97148588658431	5.83264519788058	11.3595275610055	46.7059566573889	16.2689785569234	8.05455288182346	40.4309230461135	16.6041310692707	6.97148588658431	0.348327702101562	-1.52148288152262	0.172452369210796	-2.53573014570479	2.01984874835663	1.01424726418218	1
LOF down	ENSMUSG00000081026.1	RP23-338J24.1	chr4	15819074	15821370	-	61.8750729091983	49.2751874624509	40.7864583971907	13.2635819832477	20.4358536237178	19.830993672794	22.3087548370698	13.9983484749134	30.6707244147148	50.6455729229466	17.8434764265865	22.325942575566	49.2751874624509	19.830993672794	22.3087548370698	0.352320556304773	-1.50503944289361	0.440827130330487	-1.18171507880773	0.799226118502822	-0.323324364085877	1
LOF down	ENSMUSG00000114066.1	RP24-160P23.2	chr12	14930107	14930543	+	109.740695348389	114.975437412385	141.67927653761	34.9676252285622	47.2579115048474	46.6611615830447	41.8289153195059	36.1624002268596	37.486440951318	122.131803099461	42.9622327721514	38.4925854992278	114.975437412385	46.6611615830447	37.486440951318	0.351769413714166	-1.50729804869273	0.31517249825486	-1.66578644322238	1.11611709670719	0.158488394529656	1
LOF down	ENSMUSG00000105599.1	RP23-218B2.3	chr12	115546069	115546397	-	147.682957037992	255.220201728592	267.616411237707	107.314436046277	70.2482468315299	65.3256262162625	85.0521278163286	96.8219102848177	81.7885984392394	223.506523334764	80.9627696980231	87.8875455134619	255.220201728592	70.2482468315299	85.0521278163286	0.362238956116546	-1.46498638909072	0.39322138880853	-1.34658629739821	0.921208678943274	-0.118400091692514	1
LOF down	ENSMUSG00000099871.1	RP24-500I4.2	chrY	90837413	90844040	+	73.5496149675375	44.2213220816867	42.2175622006009	14.469362163543	20.4358536237178	23.3305807915223	20.9144576597529	15.1648775144895	18.1752440976088	53.3294997499417	19.4119321929277	18.0848597572837	44.2213220816867	20.4358536237178	18.1752440976088	0.363999892816338	-1.45799006928031	0.339115495965317	-1.56015138471591	1.07338030006616	0.102161315435598	1
LOF down	ENSMUSG00000105031.1	Gm3511	chr5	113767123	113767326	+	376.503981381442	572.98198754414	583.890351791361	236.332915337869	195.417850276801	127.151665313797	195.201604824361	220.473988479886	177.208629951685	511.125440238981	186.300810309489	197.628074418644	572.98198754414	195.417850276801	195.201604824361	0.364491366781474	-1.45604345111445	0.386652783955033	-1.37088949419275	0.942683932217242	-0.0851539569217045	1
LOF down	ENSMUSG00000100913.1	RP23-219C1.1	chr1	122190221	122191055	+	98.0661532900501	75.8079807114629	90.1595396148426	32.5560648679717	40.8717072474356	25.6636388706746	29.2802407236541	31.4962840685551	36.3504881952175	88.0112245387852	33.030470328694	32.3756709958089	90.1595396148426	32.5560648679717	31.4962840685551	0.375298383834416	-1.41389001739654	0.367858431302037	-1.44277743663218	1.02022504284065	0.0288874192356462	1
LOF down	ENSMUSG00000115195.1	RP23-315I4.3	chr14	105043450	105044354	+	63.0425271150322	61.9098509143614	63.6841192517539	24.115603605905	22.9903353266825	24.4971098310984	27.8859435463373	15.1648775144895	18.1752440976088	62.8788324270492	23.8676829212286	20.4086883861452	63.0425271150322	24.115603605905	18.1752440976088	0.379582158255236	-1.39751591285928	0.324571681731256	-1.62339096193948	1.16948637117864	0.225875049080203	1
LOF down	ENSMUSG00000095616.1	Gm26244	chr18	10150977	10151140	-	35.0236261750179	60.0146513965748	77.2796053841508	30.1445045073812	17.8813719207531	17.4979355936417	30.674537900971	23.3305807915223	18.1752440976088	57.4392943185812	21.8412706739253	24.060120930034	60.0146513965748	17.8813719207531	23.3305807915223	0.380249634558269	-1.39498123344969	0.418879117779321	-1.25539413101511	0.907778923366136	-0.139587102434584	1
LOF down	ENSMUSG00000086721.2	RP23-45M23.2	chr1	64150201	64150665	+	47.8656224391911	50.5386538076419	63.6841192517539	21.7040432453145	24.2675761781649	17.4979355936417	16.7315661278024	19.830993672794	15.9033385854077	54.0294651661956	21.1565183390404	17.4886327953347	50.5386538076419	21.7040432453145	16.7315661278024	0.391573713971858	-1.35264417365177	0.323686950102862	-1.62732889245859	1.20972969051555	0.274684718806818	1
LOF down	ENSMUSG00000083159.1	RP23-11C7.2	chr11	48568355	48569015	+	80.5543402025411	82.1253124374181	77.9951572858559	22.9098234256097	33.2082621385414	38.4954583060118	41.8289153195059	32.6628131081313	26.1269133903126	80.2249366419384	31.537847956721	33.5395472726499	80.5543402025411	33.2082621385414	32.6628131081313	0.393117767078849	-1.3469665266041	0.418068853358456	-1.258187530049	0.940318236866564	-0.0887789965551057	1
LOF down	ENSMUSG00000056777.5	RP23-198F6.1	chr7	139719399	139719881	+	123.750145818397	181.307420534915	159.568074080237	84.4046126206675	43.4261889504003	57.1599229392297	65.5319673338925	60.6595100579581	52.2538267806252	154.87521347785	61.6635748367658	59.4817680574919	159.568074080237	57.1599229392297	60.6595100579581	0.398150055467623	-1.32861583628077	0.384062541201914	-1.38058683463091	1.03668026103671	0.0519709983501427	1
LOF down	ENSMUSG00000062742.3	Gm5239	chr18	35536583	35536951	+	53.7028934683607	65.7002499499345	82.2884686960865	31.3502846876765	29.3765395840943	19.830993672794	32.0688350782878	32.6628131081313	27.2628661464131	67.2305373714606	26.8526059815216	30.6648381109441	65.7002499499345	29.3765395840943	32.0688350782878	0.39941084857252	-1.32405457590313	0.456114725686565	-1.13253134645878	0.875680669970277	-0.191523229444349	1
LOF down	ENSMUSG00000083878.3	RP23-259J23.1	chr11	20446412	20446810	+	667.783805737008	754.289408079056	848.644555422248	418.405722562452	266.943337959814	233.305807915223	288.619515704591	212.308285202853	257.861275634824	756.905923079437	306.218289479163	252.929692180756	754.289408079056	266.943337959814	257.861275634824	0.404565851768378	-1.30555354356145	0.334162654127111	-1.58137758744946	1.21068541553565	0.275824043888011	1
LOF down	ENSMUSG00000111795.1	RP23-118M23.8	chr9	88286724	88287153	+	180.955401904259	172.463156118578	191.767909656967	59.0832288344672	74.079969385977	88.6562070077849	94.8122080575467	51.3272777413491	82.9245511953399	181.728822559935	73.939801742743	76.3546789980786	180.955401904259	74.079969385977	82.9245511953399	0.406868875840306	-1.29736417178283	0.420157231651554	-1.25099877919828	0.968372897548344	-0.0463653925845494	1
LOF down	ENSMUSG00000081308.1	RP23-130J1.3	chrX	10696932	10697364	-	230.572205652201	202.154615230568	199.638980575723	85.6103928009627	76.6344510889417	97.9884393243938	57.1661842699914	64.1590971766864	63.6133543416306	210.788600486164	86.7444277380994	61.6462119294361	202.154615230568	85.6103928009627	63.6133543416306	0.411523334459414	-1.28095385730382	0.292455150739912	-1.77371269674232	1.40713313962247	0.492758839438496	1
LOF down	ENSMUSG00000083713.1	RP23-267E11.3	chr6	123218953	123219447	-	40.8608972041875	49.9069206350464	62.2530154483437	20.4982630650192	21.7130944752002	20.9975227123701	29.2802407236541	20.9975227123701	18.1752440976088	51.0069444291925	21.0696267508632	22.8176691778777	49.9069206350464	20.9975227123701	20.9975227123701	0.413073689997484	-1.27552892169149	0.447344365227621	-1.16054225065192	0.923390841834569	-0.114986671039579	1
LOF down	ENSMUSG00000063586.1	Gm5513	chr19	14959549	14960766	-	56.6215289829456	50.5386538076419	59.3908078415233	26.5271639664955	20.4358536237178	22.1640517519462	19.5201604824361	12.8318194353373	21.5831023659104	55.5169968773703	23.0423564473865	17.9783607612279	56.6215289829456	22.1640517519462	19.5201604824361	0.415050484418025	-1.26864126640416	0.323835253569997	-1.62666804506491	1.28167171375711	0.358026778660752	1
LOF down	ENSMUSG00000105100.1	Gm44349	chr11	69980692	69980814	+	58.3727102916965	57.4877187061927	48.6575293159468	21.7040432453145	25.5448170296472	22.1640517519462	39.0403209648722	13.9983484749134	17.0392913415082	54.8393194379453	23.1376373423026	23.3593202604313	57.4877187061927	22.1640517519462	17.0392913415082	0.421916930761414	-1.2449691134324	0.425959339026153	-1.23121237379087	0.990509872904815	-0.0137567396415267	1
LOF down	ENSMUSG00000116182.1	RP24-113I12.3	chr15	100297171	100297451	+	86.9753383346277	123.187968656127	140.963724635905	60.2890090147625	52.3668749107768	36.1624002268596	37.6460237875553	47.8276906226208	48.8459685123235	117.042343875553	49.6060947174663	44.7732276408332	123.187968656127	52.3668749107768	47.8276906226208	0.423830325631642	-1.2384412767074	0.382538713411609	-1.38632233709327	1.10794100249823	0.147881060385866	1
LOF down	ENSMUSG00000083378.3	RP23-198D21.5	chr2	4700238	4700616	+	1504.84847131993	1964.69016677208	1863.29715204008	823.547863141656	765.067270037935	732.580236853801	524.25573867114	671.920726795843	756.544535562964	1777.61193004403	773.731790011131	650.907000343316	1863.29715204008	765.067270037935	671.920726795843	0.435264737445797	-1.20003494857901	0.366169347393609	-1.44941706894638	1.18869790861526	0.249382120367371	1
LOF down	ENSMUSG00000069236.5	RP23-443A7.2	chr13	49804944	49805952	-	64.2099813208661	68.2271826403166	67.9774306619845	28.938724327086	34.4855029900238	24.4971098310984	22.3087548370698	29.1632259894029	42.0302519757202	66.8048648743891	29.3071123827361	31.1674109340643	67.9774306619845	28.938724327086	29.1632259894029	0.438697278077596	-1.18870233978651	0.466544030777808	-1.09991485092253	0.94031270177482	-0.0887874888639859	1
LOF down	ENSMUSG00000021185.16	RP23-359F12.1	chr12	100779057	100896981	+	314.045181369327	334.818581475628	257.598684613836	127.812699111296	117.506158336377	158.647949382352	181.258633051192	185.478117292603	188.568157512691	302.15414915293	134.655602276675	185.101635952162	314.045181369327	127.812699111296	185.478117292603	0.445652004628013	-1.16601049945986	0.612606632975528	-0.706967107139042	0.727468461226759	-0.459043392320821	1
LOF down	ENSMUSG00000114447.1	RP24-421K17.1	chr13	85865112	85865333	-	869.753383346277	952.65362427405	1191.39391633899	501.604555002824	434.261889504003	418.783925207826	433.626422145544	478.276906226208	410.078944952297	1004.60030798644	451.550123238218	440.660757774683	952.65362427405	434.261889504003	433.626422145544	0.44948236592051	-1.15366357780852	0.438642865497341	-1.18888129149725	1.02471144814103	0.0352177136887301	1
LOF down	ENSMUSG00000097304.1	Rpl31-ps15	chr3	37734730	37735104	+	286.026280429313	273.540463733862	292.660727797386	155.545643258087	123.892362593789	106.154142601427	133.852529022419	117.819432997188	104.50765356125	284.075823986854	128.530716151101	118.726538526952	286.026280429313	123.892362593789	117.819432997188	0.452452145864581	-1.14416288296714	0.417939608026788	-1.25863360591821	1.08257781070509	0.114470722951073	1
LOF down	ENSMUSG00000115512.1	RP23-55A5.5	chr14	103010246	103010786	+	103.90342431922	182.570886880106	195.345669165492	89.2277333418485	67.6937651285652	62.9925681371103	43.2232124968227	66.4921552558387	68.1571653660328	160.606660121606	73.3046888691747	59.2908443728981	182.570886880106	67.6937651285652	66.4921552558387	0.456423717507548	-1.13155433340652	0.36916803031708	-1.43765047283552	1.2363576475339	0.306096139429003	1
LOF down	ENSMUSG00000029657.15	Hsph1	chr5	149614287	149636376	-	6451.93566854121	4286.30957606063	4865.03737969297	2032.94538397779	2332.24179480679	2795.00357882438	2225.29829499771	1761.45884975994	1547.16765380894	5201.09420809827	2386.73025253632	1844.6415995222	4865.03737969297	2332.24179480679	1761.45884975994	0.458890025260474	-1.1237796471776	0.354664139067128	-1.49547463155963	1.29387207420376	0.371694984382036	1
LOF down	ENSMUSG00000115472.1	RP23-54L14.2	chr14	124398691	124398972	+	137.175869185487	83.3887787826092	91.5906434182528	45.8196468512195	33.2082621385414	64.1590971766864	41.8289153195059	34.9958711872835	52.2538267806252	104.05176379545	47.7290020554824	43.0262044291382	91.5906434182528	45.8196468512195	41.8289153195059	0.458704401679443	-1.12436334345041	0.413507689439281	-1.27401393740672	1.1093007781825	0.149650593956314	1
LOF down	ENSMUSG00000111621.1	RP23-82F10.5	chr9	69436986	69437247	-	680.042074898264	416.943893913046	545.250549099286	280.946782008793	176.259237504566	300.964492210638	377.85453505287	251.970272548441	207.8793543664	547.412172636865	252.723503907999	279.234720655904	545.250549099286	280.946782008793	251.970272548441	0.461669499767677	-1.11506767111477	0.510099582387509	-0.97114917526938	0.905057592101614	-0.143918495845391	1
LOF down	ENSMUSG00000116879.1	RP24-333C3.5	chr17	27354111	27367492	+	138.927050494238	137.717831625824	127.368238503508	77.169931538896	52.3668749107768	57.1599229392297	64.1376701565757	66.4921552558387	68.1571653660328	134.671040207857	62.2322431296342	66.2623302594824	137.717831625824	57.1599229392297	66.4921552558387	0.462105609591954	-1.11370549211442	0.492031027288498	-1.02317880065648	0.939179815831009	-0.0905266914579389	1
LOF down	ENSMUSG00000095668.1	Trbd1	chr6	41533201	41533212	+	685.295618824517	819.98965802899	848.644555422248	403.936360398909	282.270228177602	409.451692891217	280.253732640689	250.803743508865	230.598409488411	784.643277425252	365.219427155909	253.885295212655	819.98965802899	403.936360398909	250.803743508865	0.46545919357692	-1.10327340144214	0.323567795095066	-1.62786007231339	1.43852138758174	0.52458667087125	1
LOF down	ENSMUSG00000063001.10	RP23-291P19.1	chr3	62923807	62924233	-	112.075603760057	157.933293148881	152.412555063186	73.5525909980102	60.030320019671	64.1590971766864	55.7718870926745	62.9925681371103	57.9335905611279	140.807150657375	65.9140027314559	58.8993485969709	152.412555063186	64.1590971766864	57.9335905611279	0.468115450271727	-1.09506371252805	0.418297993546438	-1.25739701707645	1.11909561483411	0.162333304548407	1
LOF down	ENSMUSG00000060777.4	RP23-25I3.2	chr7	110526792	110527121	+	63.0425271150322	62.5415840869569	62.2530154483437	20.4982630650192	31.931021287059	36.1624002268596	25.0973491917035	15.1648775144895	24.990960634212	62.6123755501109	29.5305615263126	21.7510624468017	62.5415840869569	31.931021287059	24.990960634212	0.471640969806013	-1.08423904924	0.347392384583676	-1.5253619667567	1.35766064754482	0.441122917516695	1
LOF down	ENSMUSG00000114155.1	RP23-66G6.1	chr12	72048709	72049259	-	65.3774355267	67.5954494677211	57.9597040381131	33.761845048267	37.0399846929885	19.830993672794	22.3087548370698	20.9975227123701	15.9033385854077	63.6441963441781	30.2109411380165	19.7365387116159	65.3774355267	33.761845048267	20.9975227123701	0.474684933951249	-1.0749578341631	0.310107438624626	-1.68915996223529	1.53071121433445	0.614202128072191	1
LOF down	ENSMUSG00000100033.1	RP23-241J21.1	chr1	47657693	47659630	+	1390.43795914821	1537.00680892491	1595.68074080237	857.309708189923	587.530791681886	696.417836626942	769.652041878908	741.91246917041	661.124504050518	1507.7085029585	713.752778832917	724.229671699945	1537.00680892491	696.417836626942	741.91246917041	0.473402370174578	-1.07886116568313	0.480351255085998	-1.05783833771088	0.985533742573076	-0.0210228279722495	1
LOF down	ENSMUSG00000083804.1	RP23-345M3.2	chr2	82543932	82544522	-	227.653570137616	173.726622463769	199.638980575723	89.2277333418485	99.6247864156242	96.8219102848177	101.783693944131	76.9909166120237	84.0605039514405	200.339724392369	95.2248100140968	87.6117048358651	199.638980575723	96.8219102848177	84.0605039514405	0.475316666741525	-1.07303910497912	0.437315690143787	-1.19325298409332	1.08689598259153	0.120213879114197	1
LOF down	ENSMUSG00000094092.1	AC113029.3	chr5	130208080	130208562	-	111.49187665714	165.514091220027	159.568074080237	95.2566342433247	61.3075608711534	51.3272777413491	75.2920475751106	66.4921552558387	68.1571653660328	145.524680652468	69.2971576186091	69.9804560656607	159.568074080237	61.3075608711534	68.1571653660328	0.476188350374049	-1.07039576840589	0.480883763165804	-1.05623987983123	0.990235867476906	-0.0141558885746608	1
LOF down	ENSMUSG00000084274.2	RP23-209M8.8	chr4	44121893	44124123	+	870.920837552111	1003.82401125429	1107.67434383949	478.694731577214	494.292209523674	471.277731988751	510.312766897972	498.107899899002	553.208992220966	994.139730881964	481.421557696546	520.543219672647	1003.82401125429	478.694731577214	510.312766897972	0.484259448387046	-1.04614789735846	0.523611725296242	-0.933430690810208	0.924844546048064	-0.11271720654825	1
LOF down	ENSMUSG00000108786.1	RP24-316O13.1	chr7	95461991	95463438	+	440.130235599391	435.264155918316	483.713085552647	229.098234256097	280.99298732612	158.647949382352	197.990199178994	233.305807915223	316.930818952053	453.035825690118	222.91305698819	249.408942015423	440.130235599391	229.098234256097	233.305807915223	0.492042890092902	-1.02314401788502	0.55052807719013	-0.861111951097698	0.893765296411886	-0.16203206678732	1
LOF down	ENSMUSG00000076231.1	Gm22759	chr2	156322552	156322647	+	282.523917811811	557.188658229252	508.757402112326	297.827704532927	228.626112415343	137.650426669982	171.498552809974	243.804569271408	206.7434016103	449.489992717796	221.368081206084	207.348841230561	508.757402112326	228.626112415343	206.7434016103	0.492487229510059	-1.02184177978307	0.46129801461618	-1.11622901169592	1.06761185590584	0.094387231912848	1
LOF down	ENSMUSG00000081751.1	RP23-71H9.1	chr2	156322402	156322680	+	284.275099120562	561.610790437421	511.619609719146	299.033484713222	231.180594118307	138.816955709558	172.892849987291	244.971098310985	209.015307122501	452.501833092376	223.010344847029	208.959751806926	511.619609719146	231.180594118307	209.015307122501	0.49283854459326	-1.02081300216836	0.461787636038742	-1.11469854815988	1.06724066677245	0.0938855459915212	1
LOF down	ENSMUSG00000084328.1	RP23-358G23.2	chr2	129749901	129750409	+	109.740695348389	147.193829214757	157.421418375122	69.9352504571245	70.2482468315299	68.8252133349909	61.349075801942	74.6578585328715	76.1088346587366	138.118647646089	69.6695702078818	70.7052563311834	147.193829214757	69.9352504571245	74.6578585328715	0.504418276570451	-0.987307545153304	0.511916801505009	-0.96601873741493	0.985352063240526	-0.0212888077383741	1
LOF down	ENSMUSG00000104491.1	RP23-290N20.1	chr3	45775933	45776191	-	105.654605627971	116.870636930172	96.5995067301885	67.523690096534	44.7034298018827	48.9942196621969	46.0118068514565	54.8268648600775	65.8852598538317	106.374916429444	53.7404465202045	55.5746438551219	105.654605627971	48.9942196621969	54.8268648600775	0.505198484041578	-0.985077784877059	0.522441245742208	-0.936659295478564	0.966995787868673	-0.0484184893984946	1
LOF down	ENSMUSG00000103948.1	RP23-285H9.2	chr1	37485851	37488605	-	141.845686008822	86.5474446455868	99.4617143370089	43.408086490629	53.6441157622592	68.8252133349909	52.9832927380408	34.9958711872835	56.7976378050273	109.284948330473	55.2924718626264	48.2589339101172	99.4617143370089	53.6441157622592	52.9832927380408	0.505947733034786	-0.982939739980141	0.441588111147607	-1.17922676384754	1.14574582119052	0.196287023867404	1
LOF down	ENSMUSG00000097999.1	RP24-80O2.1	chr16	64911273	64912278	+	138.343323391321	147.193829214757	127.368238503508	75.9641513586007	68.9710059800475	64.1590971766864	100.389396766814	83.9900908494804	70.4290708782339	137.635130369862	69.6980848384449	84.9361861648428	138.343323391321	68.9710059800475	83.9900908494804	0.506397492058515	-0.981657835073128	0.617111241414868	-0.696397519658784	0.820593530102423	-0.285260315414344	1
LOF down	ENSMUSG00000080205.2	RP23-99G18.1	chr6	54177480	54177683	-	1238.08518528688	1291.89433795785	1273.68238503508	649.91551717914	653.947315958969	629.925681371103	704.120074545016	624.093036173222	629.317826879703	1267.88730275994	644.596171503071	652.510312532647	1273.68238503508	649.91551717914	629.317826879703	0.508401787840224	-0.975958991169806	0.514643778758777	-0.958353908099862	0.987871239921315	-0.0176050830699444	1
LOF down	ENSMUSG00000082348.1	RP23-214P11.2	chr4	110512771	110513732	-	94.5637906725483	72.0175816758897	104.470577648945	49.4369873921052	47.2579115048474	43.1615744643163	50.1946983834071	46.6611615830447	40.8942992196197	90.3506499991277	46.6188244537563	45.9167197286905	94.5637906725483	47.2579115048474	46.6611615830447	0.515976636075185	-0.954622354396969	0.508205748703898	-0.976515399976816	1.01529082933655	0.0218930455798479	1
LOF down	ENSMUSG00000086691.2	RP24-264L21.1	chrX	29564014	29564208	-	1082.23004880805	1541.42894113308	1805.33744800197	888.659992877599	785.503123661652	612.427745777461	779.412122120126	753.577759566171	906.490299368236	1476.33214598103	762.196954105571	813.160060351511	1541.42894113308	785.503123661652	779.412122120126	0.516277421839301	-0.953781588232448	0.550797503505663	-0.860406074427125	0.937327091269202	-0.093375513805323	1
LOF down	ENSMUSG00000115662.1	RP24-325G24.1	chr14	92602458	92604397	-	6148.39757502439	5109.4578999526	5450.35883528775	3119.35332642381	2447.19347144021	3074.97054832264	3409.05659853973	2788.00440458692	2861.46499261728	5569.40477008825	2880.50578206222	3019.50866524798	5450.35883528775	3074.97054832264	2861.46499261728	0.517201729982462	-0.951200994076114	0.542160031439075	-0.883209334662774	0.953965065646089	-0.067991659413341	1
LOF down	ENSMUSG00000015656.17	Hspa8	chr9	40800984	40810087	+	60291.4212789845	48825.3934435629	50226.7346363861	28813.3231883353	24369.7554462835	29973.9636719083	34253.6987551434	26806.8373294592	28707.798052173	53114.5164529778	27719.0141021757	29922.7780455919	50226.7346363861	28813.3231883353	28707.798052173	0.521872662188599	-0.938230265180196	0.563363465279448	-0.827862088450385	0.926351626173933	-0.110368176729812	1
LOF down	ENSMUSG00000101262.1	RP23-76C10.2	chr1	46414502	46416932	+	705.72606742661	614.676376935445	662.601060978922	332.795329761489	321.864694573555	382.621524980966	362.517266102384	331.294247239617	307.843196903248	661.001168446992	345.76051643867	333.884903415083	662.601060978922	332.795329761489	331.294247239617	0.523086089622242	-0.934879689810939	0.5051199897264	-0.9853019584667	1.03556798436263	0.0504222686557612	1
LOF down	ENSMUSG00000108596.1	RP23-144N15.4	chr7	128062683	128128160	+	336.810538383089	289.965526221346	279.780793566694	96.46241442362	171.150274098636	207.642169044549	118.515260071933	99.1549683639699	129.498614195462	302.185619390376	158.418285855602	115.722947543788	289.965526221346	171.150274098636	118.515260071933	0.524241643845236	-0.931696134233815	0.382953192071964	-1.38476003091602	1.36894444203176	0.453063896682202	1
LOF down	ENSMUSG00000062006.12	Rpl34	chr3	130726831	130730398	-	1959.57188449225	2933.76885353361	3017.48236949041	1691.70959295424	1302.78566851201	1159.52986533866	1077.79171806593	1460.4943575493	2032.21948066388	2636.94103583876	1384.6750422683	1523.50185209304	2933.76885353361	1302.78566851201	1460.4943575493	0.525106562281499	-0.929317869680518	0.577753476997426	-0.791474057837295	0.908876507347852	-0.137843811843223	1
LOF down	ENSMUSG00000048458.8	Fam212b	chr3	105704599	105720842	+	527.105573934019	622.257175006591	511.619609719146	264.06585948466	287.379191583531	321.962014923008	287.225218527274	309.130195487671	296.483669342243	553.660786219919	291.135688663733	297.613027785729	527.105573934019	287.379191583531	296.483669342243	0.525837653505212	-0.927310642584757	0.537536764735791	-0.895564663928292	0.978235700331439	-0.0317459786564644	1
LOF down	ENSMUSG00000027994.14	Mcub	chr3	129914960	129970206	-	469.900317848157	507.913470766801	491.584156471404	261.654299124069	268.220578811296	246.137627350561	290.013812881907	265.968621023355	341.921779586265	489.799315028787	258.670835095309	299.301404497176	491.584156471404	261.654299124069	290.013812881907	0.528115959247729	-0.921073355713074	0.611069463173064	-0.710591707512461	0.86424865105419	-0.210481648200613	1
LOF down	ENSMUSG00000083261.4	AC144779.1	chr5	39798214	39799407	+	9679.36282056911	6835.98466065617	8539.39639494866	4145.47225985507	3965.83284385273	5133.89430317449	5246.74027824335	4543.63060914897	4714.20393781727	8351.58129205798	4415.06646896076	4834.85827506986	8539.39639494866	4145.47225985507	4714.20393781727	0.528650361478169	-0.919614226105525	0.578915310285924	-0.78857578357623	0.913173916953536	-0.131038442529295	1
LOF down	ENSMUSG00000100801.1	AC092404.2	chr5	5781615	5783555	-	65493.0134930776	48784.3307873442	51096.8457488595	29324.5739847805	25286.8143776478	33011.6052909645	35595.0126397222	27276.9485324083	29301.9013436136	55124.7300097604	29207.6645511309	30724.6208385814	51096.8457488595	29324.5739847805	29301.9013436136	0.529846849970229	-0.916352679961621	0.557365466155412	-0.8433044777161	0.950627339050981	-0.0730482022455211	1
LOF down	ENSMUSG00000061330.8	RP23-142A12.5	chr13	61710587	61711371	-	667.200078634091	759.975006632415	759.200567709111	517.279697346662	326.973657979485	325.461602041737	365.305860457018	345.292595714531	341.921779586265	728.791884325206	389.904985789295	350.840078585938	759.200567709111	326.973657979485	345.292595714531	0.535001821748209	-0.902384290807911	0.481399540982518	-1.05469332869307	1.11134676334816	0.152309037885157	1
LOF down	ENSMUSG00000107951.1	RP24-407P8.1	chr6	75296118	75298059	-	11938.9704359607	10845.59510712	11619.1317798874	6901.88575201001	5051.48756761274	6564.05890569481	6936.62845715139	5979.62785686717	6133.00893018685	11467.899107656	6172.47740843919	6349.7550814018	11619.1317798874	6564.05890569481	6133.00893018685	0.538239598246762	-0.893679561038869	0.553698198928404	-0.852828265815306	0.972081179401414	-0.0408512952235626	1
LOF down	ENSMUSG00000081394.1	RP23-335B9.4	chr4	132148413	132148884	-	175.118130875089	244.480737794468	274.056378353053	162.780324339859	103.456508970071	107.320671641003	72.5034532204769	108.487200680579	71.5650236343345	231.218415674203	124.519168316978	84.1852258451301	244.480737794468	107.320671641003	72.5034532204769	0.538534821951339	-0.892888461664241	0.364093948138416	-1.45761733395458	1.47910951199498	0.564728872290342	1
LOF down	ENSMUSG00000083396.1	AC107815.5	chr7	140890887	140892080	+	14242.357584071	10178.4848768591	12409.1010793698	6071.10320778658	6091.16162071938	7771.41646165609	7798.30411273321	7040.00275384186	7299.63241070211	12276.6478467666	6644.56043005402	7379.31309242573	12409.1010793698	6091.16162071938	7299.63241070211	0.541235727617945	-0.885671018403747	0.601085343860316	-0.734358251333933	0.900430751051087	-0.151312767069814	1
LOF down	ENSMUSG00000049231.6	RP23-214E3.10	chr3	107979632	107979868	+	160.524953302165	224.265276271411	221.821089528581	138.664720733954	112.397194930448	79.3239746911759	55.7718870926745	95.6553812452416	86.3324094636416	202.203773034052	110.128630118526	79.2532259338526	221.821089528581	112.397194930448	86.3324094636416	0.544641815857608	-0.876620342739834	0.391947315050871	-1.35126835234042	1.3895791473579	0.474648009600587	1
LOF down	ENSMUSG00000027663.12	Zmat3	chr3	32334792	32366014	-	930.461002049642	880.004309425565	787.10709187561	455.784908151604	457.252224830686	506.273603176035	488.004012060902	558.76740995696	496.411354415939	865.857467783606	473.103578719442	514.394258811267	880.004309425565	457.252224830686	496.411354415939	0.546398912433564	-0.871973482833784	0.594086530347769	-0.751255016030092	0.91972950828175	-0.120718466803692	1
LOF down	ENSMUSG00000108874.1	RP23-34O23.2	chr7	144791996	144792322	+	272.600557062222	363.878307415022	386.398026920754	202.571070289602	209.467499643107	146.982658986591	186.83582176046	179.645472094722	190.840063024892	340.958963799333	186.340409639767	185.773785626691	363.878307415022	202.571070289602	186.83582176046	0.546518582656871	-0.871657543818857	0.544856728670804	-0.876051175106891	1.00305007518237	0.004393631288034	1
LOF down	ENSMUSG00000081416.1	RP23-22A15.8	chr2	119669159	119669544	+	187.960127139263	224.897009444007	201.070084379133	115.754897308344	99.6247864156242	120.15249107634	82.2635334616949	100.321497403546	94.2840787563454	204.642406987468	111.844058266769	92.2897032071954	201.070084379133	115.754897308344	94.2840787563454	0.546534122195009	-0.871616523263286	0.45098034452286	-1.14886353829659	1.21188013808727	0.277247015033307	1
LOF down	ENSMUSG00000023067.13	Cdkn1a	chr17	29090979	29100722	+	823.05521511292	674.059295159424	820.022479354044	414.788382021566	426.598444395109	433.948802722315	303.956784655076	480.60996430536	389.631795342488	772.378996542129	425.111876379663	391.399514767641	820.022479354044	426.598444395109	389.631795342488	0.550392848954789	-0.86146636911422	0.506745414517875	-0.980666965920898	1.08613286511619	0.119200596806678	1
LOF down	ENSMUSG00000009013.5	Dynll1	chr5	115297110	115300999	-	10074.5460692439	8486.70344064827	11145.4364209586	6478.65690872638	4534.20502276238	5347.36911741692	7286.59704865792	7107.66143813728	6777.09414289586	9902.22864361692	5453.41034963523	7057.11754323035	10074.5460692439	5347.36911741692	7107.66143813728	0.550725553398583	-0.860594544495315	0.712679720618191	-0.488674221986445	0.772753226261123	-0.37192032250887	1
LOF down	ENSMUSG00000082609.1	AC116581.2	chr1	60117255	60117685	+	4730.52444203908	5603.4732409223	5981.29834635293	3453.3544363656	3208.42901892369	2420.54775712044	3163.66029533196	3071.47096120392	3012.54670917865	5438.43200977144	3027.44373746991	3082.55932190484	5603.4732409223	3208.42901892369	3071.47096120392	0.556675845543419	-0.8450906096192	0.566810307891372	-0.81906209984854	0.98212018693581	-0.0260285097706604	1
LOF down	ENSMUSG00000080844.1	RP23-18D24.1	chr2	147642848	147643177	-	167.529678537169	241.32207193149	237.563231366093	124.195358570411	129.001325999719	108.487200680579	147.795500795587	114.319845878459	114.731228366155	215.471660611584	120.56129508357	125.6155250134	237.563231366093	124.195358570411	114.731228366155	0.559522745317758	-0.837731315088469	0.582979333137636	-0.77848335470058	0.959764289252531	-0.0592479603878886	1
LOF down	ENSMUSG00000039410.16	Prdm16	chr4	154316125	154636873	-	280.77273650306	183.834353225298	246.149854186554	98.8739747842105	158.377865583813	141.15001378871	121.303854426567	92.1557941265132	112.459322853954	236.918981304971	132.800618052245	108.639657135678	246.149854186554	141.15001378871	112.459322853954	0.560531778926142	-0.835131927031529	0.458551934240479	-1.12484295642554	1.22239540839486	0.289711029394014	1
LOF down	ENSMUSG00000025316.16	Banp	chr8	121949750	122029258	+	2666.46540612469	1930.57657545192	2704.78618844528	1129.81602893665	1412.62838173949	1550.31709359666	1114.04344467617	1224.85549155492	1205.24587422268	2433.94272334063	1364.2538347576	1181.38160348459	2666.46540612469	1412.62838173949	1205.24587422268	0.560511889484867	-0.835183119325111	0.485377733894708	-1.04282016673717	1.15479522512761	0.207637047412056	1
LOF down	ENSMUSG00000083326.4	Rpl38-ps1	chr4	138425788	138426002	+	391.097158954366	502.227872213442	496.593019783339	325.560648679717	266.943337959814	187.811175371755	285.830921349957	341.793008595802	261.269133903126	463.306016983716	260.105054003762	296.297687949628	496.593019783339	266.943337959814	285.830921349957	0.561410913022751	-0.832870986842445	0.639529117015639	-0.644918050060686	0.877850434148446	-0.187952936781759	1
LOF down	ENSMUSG00000081880.1	RP23-344H22.1	chrX	41248575	41250133	+	168.113405640086	157.301559976285	206.794499592774	97.6681946039152	111.119954078965	90.9892650869371	112.938071362666	103.821084522274	102.235748049049	177.403155069715	99.9258045899391	106.331634644663	168.113405640086	97.6681946039152	103.821084522274	0.563269602227033	-0.828102478626141	0.599378486830617	-0.73846079198311	0.939756121721153	-0.0896416866430304	1
LOF down	ENSMUSG00000078974.10	Sec61g	chr11	16500530	16508484	-	544.617387021528	615.308110108041	694.085344653947	348.470472105327	357.627438415061	338.293421477074	276.070841108739	325.461602041737	314.658913439851	618.003613927839	348.130443999154	305.397118863442	615.308110108041	348.470472105327	314.658913439851	0.563314576409263	-0.827987291441845	0.494167205467349	-1.0169288229489	1.13992707362383	0.188941531507058	1
LOF down	ENSMUSG00000083392.1	RP23-38J11.2	chrX	112162554	112163747	+	2023.1981387102	1597.65319349408	2194.59768252954	1068.32123974159	979.643733086971	1233.02119483196	1307.85075232322	1321.67740183974	1271.13113407651	1938.48300491127	1093.66205588684	1300.21976274649	2023.1981387102	1068.32123974159	1307.85075232322	0.564184495358472	-0.82576107585647	0.670740862546795	-0.576172598995629	0.841136311892897	-0.249588476860841	1
LOF down	ENSMUSG00000111992.1	RP23-234F23.2	chr10	95870483	95870799	-	136.59214208257	94.1282427167331	108.04833715747	56.6716684738767	66.4165242770828	68.8252133349909	44.6175096741396	48.9942196621969	63.6133543416306	112.922907318924	63.9711353619835	52.408361225989	108.04833715747	66.4165242770828	48.9942196621969	0.566502730764024	-0.819845184472251	0.464107438165525	-1.10746927538287	1.22062842389089	0.287624090910618	1
LOF down	ENSMUSG00000083454.1	RP23-60A13.2	chr4	145576889	145577292	-	1582.48417600789	2400.58605586299	2425.72094678029	1545.81019113851	1245.3098301953	846.900082732261	1247.89597369859	1349.67409878957	1165.48752775916	2136.26372621706	1212.67336802202	1254.35253341577	2400.58605586299	1245.3098301953	1247.89597369859	0.567660889963924	-0.816898746966246	0.587171198959133	-0.768146889883803	0.966772367190704	-0.0487518570824431	1
LOF down	ENSMUSG00000081715.1	Rps11-ps3	chr4	10946608	10947093	+	1899.4479928918	1785.27794575495	2014.27860329986	1211.80908119673	1061.38714758184	977.551335164786	1107.07195878959	1069.7071292913	1184.79872461287	1899.66818064887	1083.58252131445	1120.52593756459	1899.4479928918	1061.38714758184	1107.07195878959	0.570406206911532	-0.809938414242018	0.589853506511779	-0.761571397482764	0.967030289070836	-0.0483670167592539	1
LOF down	ENSMUSG00000085812.1	AC114629.2	chr1	72459499	72460027	+	206.055667329689	236.899939723322	208.941155297889	139.870500914249	122.615121742307	109.653729720155	112.938071362666	139.983484749134	112.459322853954	217.298920783633	124.046450792237	121.793626321918	208.941155297889	122.615121742307	112.938071362666	0.57085626723269	-0.808800551845233	0.560488868894057	-0.835242372973169	1.01849706374917	0.0264418211279356	1
LOF down	ENSMUSG00000082052.1	Ywhaq-ps2	chr5	114828573	114829215	-	148.850411243826	143.403430179184	135.954861323969	85.6103928009627	88.129618752283	71.1582714141431	105.966585476082	86.3231489286326	86.3324094636416	142.736234248993	81.6327609891296	92.8740479561187	143.403430179184	85.6103928009627	86.3324094636416	0.571913371672165	-0.806131457890314	0.650669036105483	-0.620004194175778	0.878962022067775	-0.186127263714536	1
LOF down	ENSMUSG00000093798.2	RP23-299H4.3	chr10	14745362	14747302	-	29906.0906637448	27088.0867077235	29019.922925552	18500.28530627	14001.1142139496	16927.502893289	18968.0188002186	16194.9226564352	16611.0371524583	28671.3667656734	16476.3008045029	17257.992869704	29019.922925552	16927.502893289	16611.0371524583	0.574660459655135	-0.799218309019985	0.601924317412242	-0.732345992882494	0.954705505379284	-0.0668723161374909	1
LOF down	ENSMUSG00000083270.1	RP23-277K21.1	chr2	50909684	50911849	+	1904.11780971514	2037.97121479316	2029.30519323566	1124.99290821547	1164.84365655191	1157.19680725951	1398.48006884881	1142.03192974502	1238.1885041496	1990.46473924799	1149.01112400896	1259.56683424781	2029.30519323566	1157.19680725951	1238.1885041496	0.577257713413737	-0.792712549227688	0.632800375415685	-0.660177639181925	0.912227198086818	-0.132534910045763	1
LOF down	ENSMUSG00000086324.8	RP24-459O21.3	chr16	35966752	35983230	-	40221.7160264935	61696.3251020241	66575.6644865442	38759.8038955908	33896.6949574904	24870.3991237628	23512.0333010943	29073.4032533556	34465.9425728467	56164.5685383539	32508.9659922813	29017.1263757655	61696.3251020241	33896.6949574904	29073.4032533556	0.578816268660222	-0.788822622938979	0.516644694883576	-0.952755638621382	1.12033719574079	0.163933015682403	1
LOF down	ENSMUSG00000109757.1	RP23-96L20.1	chr8	15877664	15878196	+	184.457764521761	168.672757083005	169.585800704109	78.3757117191912	113.67443578193	110.820258759731	98.9950995894972	95.6553812452416	89.7402677319432	174.238774102958	100.956802086951	94.796916188894	169.585800704109	110.820258759731	95.6553812452416	0.579416393433157	-0.787327591518015	0.544063264201332	-0.878153675686041	1.06497981311736	0.0908260841680253	1
LOF down	ENSMUSG00000103823.1	RP24-400J22.1	chr3	41976152	41978048	-	639.181177694076	713.226751860347	752.760600593765	458.196468512195	347.409511603202	414.117809049521	482.426823351634	398.952931535032	421.438472513303	701.722843382729	406.574596388306	434.272742466656	713.226751860347	414.117809049521	421.438472513303	0.579394842596787	-0.787381252172652	0.618866474936456	-0.692299924101841	0.936219469080593	-0.0950813280708114	1
LOF down	ENSMUSG00000082951.1	RP23-125H15.5	chr2	26722387	26723081	-	239.328112195955	202.786348403163	212.518914806415	103.697095505391	122.615121742307	157.481420342776	115.7266657173	96.8219102848177	117.003133878356	218.211125135178	127.931212530158	109.850569960158	212.518914806415	122.615121742307	115.7266657173	0.58627264054895	-0.770356362501154	0.503414158614083	-0.990182301759406	1.16459307017303	0.219825939258252	1
LOF down	ENSMUSG00000091682.2	Tcrg-C3	chr13	19260884	19263528	+	926.374912329223	814.935792648226	655.445541961871	407.553700939794	490.460486969227	510.939719334339	617.67364955137	373.289292664357	379.408220537583	798.918748979773	469.651302414453	456.790387584437	814.935792648226	490.460486969227	379.408220537583	0.587858656483156	-0.766458776736214	0.571760755605952	-0.806516494917806	1.02815495942904	0.0400577181815923	1
LOF down	ENSMUSG00000028410.13	Dnaja1	chr4	40722150	40737149	+	10633.7566338383	8929.54839463773	10965.8328936307	5840.79919335019	5533.00736862159	6604.88742207997	6855.75922086701	6585.05642840718	6939.53538701824	10176.3793073689	5992.89799468392	6793.45034543081	10633.7566338383	5840.79919335019	6855.75922086701	0.588902773144899	-0.763898627690916	0.667570472782156	-0.583007950421769	0.88215820974016	-0.180890677269147	1
LOF down	ENSMUSG00000051721.6	RP23-335F6.3	chr12	4843303	4860043	+	445.967506628561	370.195639140977	368.509229378126	208.599971191078	222.239908157931	269.468208142083	253.762086271669	281.133498537844	263.541039415327	394.890791715888	233.436029163697	266.14554140828	370.195639140977	222.239908157931	263.541039415327	0.59114072564054	-0.758426478839761	0.673972518457112	-0.569238328842175	0.877099153825746	-0.189188149997586	1
LOF down	ENSMUSG00000109750.1	Hmgb1-rs17	chr8	33484196	33485167	+	207.806848638439	226.160475789198	244.003198481439	125.401138750706	144.328216217507	132.984310511677	146.401203618271	109.653729720155	128.362661439362	225.990174303025	134.237888493297	128.139198259263	226.160475789198	132.984310511677	128.362661439362	0.593998782943988	-0.75146811982508	0.567012254645388	-0.81854817889962	1.04759425934361	0.0670800590745402	1
LOF down	ENSMUSG00000064337.1	mt-Rnr1	chrM	70	1024	+	23824.237978453	38859.1709126959	35821.9593031607	21007.1023011038	20006.7006976197	17562.0946908184	16483.3812302399	15132.2147013814	18328.5977196823	32835.1227314365	19525.2992298473	16648.0645504345	35821.9593031607	20006.7006976197	16483.3812302399	0.594646756448809	-0.749895189588681	0.507020018977897	-0.979885383733776	1.17282697761631	0.229990194145096	1
LOF down	ENSMUSG00000080186.2	RP23-163B21.3	chrX	5885743	5885952	-	162.276134610916	157.301559976285	188.905702050146	92.8450738827342	99.6247864156242	110.820258759731	104.572288298765	68.8252133349909	107.915511829552	169.494465545782	101.096706352696	93.7710044877693	162.276134610916	99.6247864156242	104.572288298765	0.596460220852398	-0.745502170030789	0.553239329590031	-0.854024374068486	1.07812331652993	0.108522204037696	1
LOF down	ENSMUSG00000083911.1	AC147266.4	chr8	123853829	123854195	+	1625.09625452083	2196.53624111464	2207.47761676023	1333.59287940655	1206.99260465083	1060.37489697469	863.069952759138	1045.2100194602	1049.62034663691	2009.70337079857	1200.32012701069	985.966772952083	2196.53624111464	1206.99260465083	1045.2100194602	0.597262334557232	-0.743563351612537	0.490603134411972	-1.02737164373509	1.21740423707871	0.283808292122557	1
LOF down	ENSMUSG00000064339.1	mt-Rnr2	chrM	1094	2675	+	43151.4423560337	80638.8442823009	76246.3484380886	45186.6122565645	40242.0275076548	34679.7418175584	23142.5445491053	25281.0173456936	30310.6273910309	66678.8783588077	40036.1271939259	26244.7297619433	76246.3484380886	40242.0275076548	25281.0173456936	0.600431923561855	-0.735927411166585	0.393598848809618	-1.34520209377089	1.52549207239242	0.609274682604306	1
LOF down	ENSMUSG00000081783.2	RP24-465A20.1	chr17	5110766	5112110	-	276.686646782641	257.115401246378	294.807383502501	154.339863077792	186.477164316425	158.647949382352	164.52706692339	122.485549155492	148.809811049172	276.20314384384	166.48832559219	145.274142376018	276.686646782641	158.647949382352	148.809811049172	0.602774911520627	-0.730308724033265	0.525968460584045	-0.926951803208584	1.14602862470365	0.196643079175318	1
LOF down	ENSMUSG00000082364.1	RP23-81P12.11	chr11	4107755	4108224	+	166.362224331335	226.792208961793	209.656707199594	139.870500914249	118.78339918786	104.98761356185	103.177991121448	122.485549155492	112.459322853954	200.937046830907	121.213837887986	112.707621043631	209.656707199594	118.78339918786	112.459322853954	0.603242855410283	-0.72918917110227	0.560910110013098	-0.834158508062509	1.075471532143	0.10496933696024	1
LOF down	ENSMUSG00000058700.2	RP23-16J4.2	chr6	90844981	90845460	-	158.773771993414	156.038093631094	191.052357755262	112.137556767458	103.456508970071	89.822736047361	97.6008024121804	99.1549683639699	94.2840787563454	168.621407793257	101.805600594963	97.0132831774986	158.773771993414	103.456508970071	97.6008024121804	0.603752524233371	-0.727970779152031	0.57533194893287	-0.797533507705017	1.04939856956183	0.0695627285529867	1
LOF down	ENSMUSG00000072978.3	RP23-421G18.2	chr1	78967637	78968079	-	788.615316040819	620.9937086614	573.157073265785	331.589549581194	401.053627365462	466.611615830447	486.609714883585	368.623176506053	363.504881952175	660.922032656001	399.751597592368	406.245924447271	620.9937086614	401.053627365462	368.623176506053	0.604839266722451	-0.725376291196713	0.614665428560036	-0.702126750938876	0.984013804289263	-0.0232495402578371	1
LOF down	ENSMUSG00000113843.1	RP24-541L1.3	chr13	34393724	34394524	-	621.669364606567	578.035852924905	592.476974611823	364.145614449165	411.27155417732	319.628956843856	368.094454811652	366.290118426901	322.610582732555	597.394064047765	365.01537515678	352.331718657036	592.476974611823	364.145614449165	366.290118426901	0.611012725308223	-0.710725668120131	0.589781083979544	-0.761748543234638	1.03599919004763	0.0510228751145074	1
LOF down	ENSMUSG00000060636.14	Rpl35a	chr16	33056453	33060189	+	6453.10312274704	8111.45393612653	8420.61477926561	5842.00497353048	4463.95677593085	3724.72722336654	4343.23570734203	4555.29589954474	4305.26094562107	7661.72394604639	4676.89632427596	4401.26418416928	8111.45393612653	4463.95677593085	4343.23570734203	0.61042349701066	-0.712117598035512	0.574448285420205	-0.799751074472043	1.06262567493633	0.0876334764365314	1
LOF down	ENSMUSG00000066626.5	RP24-240O5.2	chr9	57334128	57334754	+	4071.49654284583	4545.95190999739	4897.95276717141	2787.76377684262	2973.41670225094	2519.70272548441	2608.73001875985	2638.68868752118	2561.57346500673	4505.13374000488	2760.29440152599	2602.99739042925	4545.95190999739	2787.76377684262	2608.73001875985	0.612699768935828	-0.706747787647848	0.577784709766782	-0.791396069308678	1.06042918509065	0.0846482816608305	1
LOF down	ENSMUSG00000081302.1	RP23-334J9.1	chr11	18325630	18327671	-	234.074568269703	176.885288326747	222.536641430286	106.108655865982	141.773734514542	141.15001378871	139.429717731686	108.487200680579	139.722189000367	211.165499342245	129.677468056411	129.213035804211	222.536641430286	141.15001378871	139.429717731686	0.614103480257622	-0.703446315715998	0.611904104632118	-0.708622518132507	1.00359431422155	0.00517620241650912	1
LOF down	ENSMUSG00000083826.1	RP23-185C16.2	chr4	143166603	143167396	+	370.666710352273	408.731362669304	478.704222240712	277.329441467907	265.666097108331	232.139278875647	290.013812881907	223.973575598614	262.405086659226	419.367431754096	258.378272483962	258.797491713249	408.731362669304	265.666097108331	262.405086659226	0.616114301969606	-0.698730069312449	0.617113948574336	-0.696391190820949	0.998380126381782	-0.00233887849150004	1
LOF down	ENSMUSG00000050549.8	RP23-173N16.6	chr3	127869058	127896324	-	1203.06155911186	1344.95992445587	1294.43339018453	739.143250520988	774.007955998311	859.731902167598	582.816220118449	666.088081597963	951.928409612258	1280.81829125075	790.961036228966	733.610903776223	1294.43339018453	774.007955998311	666.088081597963	0.617543520132408	-0.695387283587969	0.572767354110654	-0.803978828899819	1.07817513638025	0.10859154531185	1
LOF down	ENSMUSG00000082417.1	RP23-463G15.2	chr2	87546893	87547202	-	304.705547722656	402.414030943349	402.140168758266	271.300540566431	236.289557524237	180.812001134298	244.002006030451	223.973575598614	248.77365358602	369.753249141424	229.467366408322	238.916411738362	402.140168758266	236.289557524237	244.002006030451	0.620595943216594	-0.688273828765867	0.64615094605154	-0.630056865445392	0.960450413342105	-0.0582169633204751	1
LOF down	ENSMUSG00000029436.9	Mmp17	chr5	129584169	129611099	+	199.634669197602	196.469016677208	186.759046345031	107.314436046277	123.892362593789	130.651252432525	103.177991121448	108.487200680579	115.867181122256	194.287577406614	120.61935035753	109.177457641428	196.469016677208	123.892362593789	108.487200680579	0.620828938049358	-0.687732288961404	0.561937407932861	-0.83151865179673	1.10480087156528	0.143786362835327	1
LOF down	ENSMUSG00000100215.1	AC122223.2	chr1	55335401	55335796	+	338.561719691839	515.494268837948	536.663926278825	325.560648679717	298.874359246873	239.138453113104	209.144576597529	275.300853339964	254.453417366522	463.573304936204	287.857820346565	246.299615768005	515.494268837948	298.874359246873	254.453417366522	0.620954263934976	-0.687441083485276	0.531306727858068	-0.912383113327995	1.16873028587143	0.224942029842719	1
LOF down	ENSMUSG00000108608.1	RP23-412J12.1	chr7	128314784	128340805	+	206.639394432605	221.738343581029	240.425438972914	130.224259471887	144.328216217507	141.15001378871	90.6293165255961	117.819432997188	94.2840787563454	222.934392328849	138.567496492701	100.91094275971	221.738343581029	141.15001378871	94.2840787563454	0.621561774498666	-0.686030312887145	0.452648609779583	-1.14353657143536	1.3731662067875	0.457506258548219	1
LOF down	ENSMUSG00000098761.1	RP23-16D16.1	chr9	71908843	71909551	+	301.786912208071	235.63647337813	274.771930254758	149.516742356611	178.813719207531	178.478943055146	200.778793533628	177.31241401557	164.713149634579	270.731771946986	168.936468206429	180.934785727926	274.771930254758	178.478943055146	177.31241401557	0.623999418285896	-0.680383410730038	0.668317517470227	-0.581394405293716	0.933687060377995	-0.0989890054363222	1
LOF down	ENSMUSG00000045799.6	RP23-239P22.2	chr14	8800000	8800335	-	48710.8592842149	42200.4076625536	42984.6338392288	22775.981825597	30229.7364728845	30997.0096396166	29061.3360668154	21173.6685973461	25106.8278153343	44631.9669286658	28000.9093126994	25113.9441598319	42984.6338392288	30229.7364728845	25106.8278153343	0.627373410574814	-0.67260370890754	0.562689612133182	-0.829588764977368	1.11495466958491	0.156985056069828	1
LOF down	ENSMUSG00000002083.13	Bbc3	chr7	16308393	16318205	+	796.787495481657	1255.25381394731	899.44874044331	718.644987455969	600.30320019671	538.936416284166	501.946983834071	643.924029846016	554.344944977067	983.830016624092	619.294867978948	566.738652885718	899.44874044331	600.30320019671	554.344944977067	0.629473443089277	-0.66778258164775	0.576053427227623	-0.795725471376376	1.09273448145036	0.127942889728625	1
LOF down	ENSMUSG00000092056.2	RP24-391B9.1	chr18	84658932	84659844	-	577.889831887795	518.652934700925	577.450384676016	321.943308138832	378.063292038779	359.290944189444	366.700157634335	282.30002757742	306.707244147148	557.997717088245	353.099181455685	318.569143119634	577.450384676016	359.290944189444	306.707244147148	0.632796820922914	-0.660185742943706	0.570914778615938	-0.808652686679397	1.10839103247072	0.148466943735691	1
LOF down	ENSMUSG00000069188.5	RP23-349P20.4	chr2	4959545	4959752	-	5905.56710021093	7528.99595099346	7910.42627334988	5831.15295190783	4373.27267547561	3305.94329815871	4803.35377585659	4696.44591333345	4285.94974876736	7114.99644151809	4503.45630851405	4595.24981265247	7528.99595099346	4373.27267547561	4696.44591333345	0.63295271410609	-0.65983037038825	0.645854126621601	-0.630719741986983	0.980024262470851	-0.0291106284012678	1
LOF down	ENSMUSG00000096699.1	Rps19-ps4	chr18	42252398	42252835	+	5027.64153742382	5885.8579690725	6538.7132777812	4220.23063103337	3732.09776803146	3126.29782606399	3583.34374570434	3610.40737748808	3546.44450454591	5817.40426142584	3692.87540837627	3580.06520924611	5885.8579690725	3732.09776803146	3583.34374570434	0.634797796822041	-0.655630973833726	0.615405952270651	-0.700389697251295	1.03151065484473	0.0447587234175695	1
LOF down	ENSMUSG00000090877.3	Hspa1b	chr17	34956436	34959238	-	1009.26416094343	686.693958611335	678.343202816435	513.662356805776	444.479816315862	551.768235719503	535.410116089675	479.443435265784	497.547307172039	791.433774123733	503.303469613714	504.133619509166	686.693958611335	513.662356805776	497.547307172039	0.635938831610978	-0.653040089716478	0.636987750576272	-0.650662465502781	0.998353313757847	-0.00237762421369626	1
LOF down	ENSMUSG00000079942.5	Rpl28-ps3	chr4	126069867	126070259	-	6300.1666217828	7941.51771269833	7610.61002653544	5296.99233203703	4884.16901606855	3758.55656551425	4577.47763313126	4971.74676667341	4525.63578030458	7284.09812033886	4646.57263787328	4691.62006003642	7610.61002653544	4884.16901606855	4577.47763313126	0.637906376480431	-0.648583395190042	0.64409072784678	-0.634664171461607	0.990398322629137	-0.0139192237284355	1
LOF down	ENSMUSG00000066407.3	RP24-321J24.3	chr13	73317844	73318143	+	7384.1478518996	8741.29190920427	9308.61468928164	6801.8059970455	5358.02537196851	4162.17561320758	5667.81802579305	5705.49353256679	5361.69700879458	8478.0181501285	5440.66899407386	5578.33618905147	8741.29190920427	5358.02537196851	5667.81802579305	0.641738304604997	-0.639942996322151	0.657976438628752	-0.603892171233917	0.975321101075297	-0.0360508250882339	1
LOF down	ENSMUSG00000113611.1	RP24-65E6.4	chr12	26150316	26150513	+	610.578549651145	604.568646173917	626.107913991962	349.676252285622	468.747392494027	365.123589387325	412.711964485791	376.788879783086	427.118236293806	613.751703272341	394.515744722325	405.539693520894	610.578549651145	365.123589387325	412.711964485791	0.642793726875028	-0.637572245293225	0.660755304398631	-0.597811993334731	0.972816597303066	-0.0397602519584936	1
LOF down	ENSMUSG00000020326.7	Ccng1	chr11	40748552	40755311	-	6072.51305164518	5509.34499820557	4616.7408698013	2815.49672098941	3486.86752454685	4126.01321298072	3237.55804572976	2943.15276685054	3419.21779586265	5399.53297321735	3476.12581950566	3199.97620281432	5509.34499820557	3486.86752454685	3237.55804572976	0.643782682085259	-0.635354326406279	0.592639440982539	-0.754773452023125	1.08629739697704	0.119419125616845	1
LOF down	ENSMUSG00000084941.1	RP23-191E3.14	chr11	3308996	3320722	+	665.44889732534	748.603809525696	721.991868820446	396.701679317137	491.737727820709	488.775667582393	557.718870926745	550.601706679927	519.13040953795	712.014858557161	459.071691573413	542.483662381541	721.991868820446	488.775667582393	550.601706679927	0.644750156624096	-0.633187876410245	0.761899356258996	-0.392327658606642	0.84624058456997	-0.240860217803603	1
LOF down	ENSMUSG00000080904.1	RP23-385C16.6	chr11	5818497	5818583	-	1226.99437033146	1559.11746996575	1433.25045911531	934.479639728818	948.989952651395	839.900908494804	747.343287041838	818.903385782434	807.662409587489	1406.45409980417	907.790166958339	791.303027470587	1433.25045911531	934.479639728818	807.662409587489	0.645445995773865	-0.631631704062193	0.562622717357618	-0.829760288488754	1.14720926806018	0.198128584426561	1
LOF down	ENSMUSG00000111671.1	RP24-275P22.2	chr10	44852614	44853241	+	1522.36028440744	1728.42196022135	1991.38094244529	1193.7223784923	1235.09190338344	958.886870531568	1038.75139710106	1151.36416206163	1034.8529608076	1747.38772902469	1129.2337174691	1074.98950665676	1728.42196022135	1193.7223784923	1038.75139710106	0.646241071006826	-0.629855652772231	0.615198040366674	-0.700877187097676	1.05046022354306	0.0710215343254445	1
LOF down	ENSMUSG00000083337.1	RP23-85A17.3	chr11	96248633	96249189	+	10065.7901627001	12469.1493606905	13870.2580626517	9497.93048018568	8113.03388861596	5918.96834680922	8439.68081429897	8521.49463410353	7398.46030048286	12135.0658620141	7843.31090520362	8119.87858296179	12469.1493606905	8113.03388861596	8439.68081429897	0.646334432329306	-0.629647244185128	0.66912521738997	-0.5796518786344	0.965939431860656	-0.0499953655507282	1
LOF down	ENSMUSG00000106561.1	Gm47293	chr12	87266858	87266933	+	1068.22059833805	900.219770948622	835.049069289851	441.315545988061	698.650745760852	673.087255835419	582.816220118449	509.773190294763	478.23611031833	934.496479525508	604.351182528111	523.608506910514	900.219770948622	673.087255835419	509.773190294763	0.646713172033533	-0.628802099881301	0.560310839454823	-0.835700692491567	1.15420428536199	0.206898592610266	1
LOF down	ENSMUSG00000068240.5	RP23-24J10.5	chr4	3973092	3973595	-	26385.0487789497	32701.6676794073	33625.214964926	24326.6151374567	20205.950270451	15538.1668071539	18630.5988833079	19947.6465767516	18438.7851370241	30903.9771410943	20023.5774050205	19005.6768656945	32701.6676794073	20205.950270451	18630.5988833079	0.647928818792528	-0.626092766986894	0.614991293156953	-0.701362109489476	1.05355771049456	0.0752693425025811	1
LOF down	ENSMUSG00000036964.14	Trim17	chr11	58954685	58973098	+	747.170691733715	1159.23037171279	1159.90963266397	664.384879342683	754.849343226076	569.266171313145	684.59991406258	646.257087925169	705.42666153844	1022.10356537016	662.833464627301	678.761221175396	1159.23037171279	664.384879342683	684.59991406258	0.648499317568914	-0.624823038591516	0.664082627409269	-0.590565337144575	0.976534079951543	-0.0342577014469405	1
LOF down	ENSMUSG00000059585.4	RP23-407N2.1	chr7	61549246	61549701	-	345.566444926843	297.546324292492	283.35855307522	172.426565782221	213.299222197554	215.807872321582	223.087548370698	187.811175371755	224.918645707908	308.823774098185	200.511220100452	211.93912315012	297.546324292492	213.299222197554	223.087548370698	0.649273912560577	-0.623100850985965	0.686278521687706	-0.543133891217843	0.946079313343326	-0.0799669597681221	1
LOF down	ENSMUSG00000091577.2	RP23-343A4.2	chr13	103159795	103164069	-	684.711891721599	555.293458711466	643.281159632885	352.087812646213	425.321203543626	444.4475640785	496.369795124803	318.46242780428	402.127275659594	627.762170021983	407.285526756113	405.653166196226	643.281159632885	425.321203543626	402.127275659594	0.648789535600481	-0.624177544535383	0.646189250591542	-0.629971343428721	1.00402403012207	0.00579379889333756	1
LOF down	ENSMUSG00000062458.5	RP23-296C23.1	chr8	47632329	47632764	-	6635.80970596005	9433.03973319636	9458.88058863971	6811.45223848787	5404.00604262187	4398.98100824154	5454.49055766357	5960.96339223396	5049.31000086693	8509.24334259871	5538.14642978376	5488.25465025482	9433.03973319636	5404.00604262187	5454.49055766357	0.650838882707569	-0.619627651169946	0.644975637584566	-0.632683427684385	1.00909064588077	0.0130557765144392	1
LOF down	ENSMUSG00000021037.7	Ahsa1	chr12	87266479	87273998	+	6554.08791155168	6591.5039228617	6804.8985852155	4375.77627429146	4554.6408763861	4071.18634812065	3993.26711583549	3750.39086223722	4023.54466210814	6650.16347320963	4333.86783293274	3922.40088006028	6591.5039228617	4375.77627429146	3993.26711583549	0.651693428348318	-0.617734647941483	0.589820219587351	-0.761652814708134	1.10490181025712	0.143918166766651	1
LOF down	ENSMUSG00000078180.4	RP24-218K1.4	chr13	120304194	120304665	-	1773.36293866174	2254.65569299343	2284.04167024268	1550.63331185969	1324.49876298721	1247.01954330687	1213.03854426567	1304.1794662461	1277.94685061312	2104.02010063262	1374.05053938459	1265.0549537083	2254.65569299343	1324.49876298721	1277.94685061312	0.653059606688859	-0.614713418047012	0.601256116007605	-0.733948430763162	1.08615877544038	0.11923501271615	1
LOF down	ENSMUSG00000044783.16	Hjurp	chr1	88262471	88277633	-	12450.8991052189	9980.75239383668	9149.04661520141	7393.84406557047	6258.48017226357	7054.00110231678	7723.0120651581	6547.72749914074	7631.33061548347	10526.899371419	6902.10844671694	7300.69005992744	9980.75239383668	7054.00110231678	7631.33061548347	0.655663952241861	-0.608971515797107	0.69352710635281	-0.527975823821487	0.945404939815448	-0.0809956919756196	1
LOF down	ENSMUSG00000083374.1	RP23-272O14.1	chr2	161482563	161483038	-	422.034695408965	542.658795259555	568.148209953849	359.322493727984	338.468825642826	306.797137408519	315.111162073611	344.126066674954	353.28130714727	510.94723354079	334.862818926443	337.506178631945	542.658795259555	338.468825642826	344.126066674954	0.655376518248064	-0.609604111988318	0.66054996773948	-0.598260395666126	0.992167966476298	-0.0113437163221923	1
LOF down	ENSMUSG00000020520.14	Galnt10	chr11	57645442	57787514	+	3706.66710352273	3168.14186056655	3375.97387224466	2158.3465227285	2254.33010286637	2313.22708547944	2201.59524298333	2456.7101573473	2410.49174844536	3416.92761211131	2241.96790369144	2356.26571625866	3375.97387224466	2254.33010286637	2410.49174844536	0.656135616026741	-0.607934060000967	0.689586079584148	-0.536197443310727	0.951491968083841	-0.0717366166902397	1
LOF down	ENSMUSG00000027694.9	RP24-418L2.1	chr3	60877014	60877587	+	1297.0416226815	1041.09626843742	1031.82584225875	605.301650508215	777.839678552758	837.567850415652	868.647141468405	669.587668716691	705.42666153844	1123.32124445922	740.236393158875	747.887157241179	1041.09626843742	777.839678552758	705.42666153844	0.658971239803473	-0.601712593384438	0.665782082311831	-0.586878050044063	0.989770162506165	-0.0148345433403756	1
LOF down	ENSMUSG00000003429.11	Rps11	chr7	45122379	45124439	-	14534.8048626324	16081.3996415917	18582.1673353797	12847.5878210459	10441.4439608683	9130.42279276227	10418.1885089116	11041.1973595879	10317.8588836613	16399.4572798679	10806.4848582255	10592.4149173869	16081.3996415917	10441.4439608683	10418.1885089116	0.658953810105143	-0.601750752973785	0.645900332957374	-0.630616530961062	1.02020973899797	0.0288657779872763	1
LOF down	ENSMUSG00000030701.17	Plekhb1	chr7	100642892	100662414	-	1731.91831435463	1801.07127506984	1821.07958983948	1034.55939469332	1258.08223871013	1238.85384002984	1561.61283859489	1079.03936160791	1191.61444114947	1784.68972642132	1177.1651578111	1277.42221378409	1801.07127506984	1238.85384002984	1191.61444114947	0.659590930784122	-0.600356532683727	0.715767113393763	-0.482437835617103	0.921516116683142	-0.117918697066624	1
LOF down	ENSMUSG00000044594.14	Serpinb3a	chr1	107045587	107052303	-	304.705547722656	249.534603175232	219.674433823466	182.072807224583	158.377865583813	171.479768817689	122.698151603884	132.984310511677	123.81885041496	257.971528240451	170.643480542028	126.500437510174	249.534603175232	171.479768817689	123.81885041496	0.661481837573076	-0.596226550179297	0.490365887945062	-1.02806947271879	1.34895565502139	0.43184292253949	1
LOF down	ENSMUSG00000067321.5	AC117724.1	chr5	46414344	46414614	+	4601.52075229443	4670.40334499871	4336.96007623461	2672.00887953427	3420.45100026976	2917.48912797987	3360.25619733364	2317.89320163774	2993.23551232494	4536.29472450925	3003.31633592797	2890.46163709877	4601.52075229443	2917.48912797987	2993.23551232494	0.662063758710668	-0.594957935337699	0.637185591465614	-0.650214450993584	1.03904383209267	0.055256515655885	1
LOF down	ENSMUSG00000021285.15	Ppp1r13b	chr12	111828457	111908110	-	2363.51103971079	1868.03499136496	2062.2205807141	1367.35472445481	1393.46976896726	1410.33360884753	1532.33259787123	1648.30553292105	1627.82029949208	2097.92220392995	1390.38603408987	1602.81947676145	2062.2205807141	1393.46976896726	1627.82029949208	0.662744324591882	-0.593475684254588	0.76400329514553	-0.388349234270497	0.867462652063091	-0.205126449984091	1
LOF down	ENSMUSG00000100794.1	RP24-369P14.1	chr1	100282791	100283280	+	311.710272957659	278.594329114626	269.763066942823	183.278587404878	228.626112415343	159.814478421928	184.047227405826	177.31241401557	190.840063024892	286.689223005036	190.57305941405	184.066568148763	278.594329114626	183.278587404878	184.047227405826	0.664737437342394	-0.589143487573263	0.64204216056468	-0.639260057912886	1.03534857704322	0.0501165703396232	1
LOF down	ENSMUSG00000102740.1	RP23-310C14.2	chr1	141356789	141357277	+	178.620493492591	226.792208961793	241.140990874619	135.047380193068	153.268902177883	141.15001378871	147.795500795587	139.983484749134	136.314330732066	215.517897776334	143.15543205322	141.364438758929	226.792208961793	141.15001378871	139.983484749134	0.664239181665496	-0.590225268874083	0.655928998090162	-0.608388438042593	1.01266933402781	0.0181631691685094	1
LOF down	ENSMUSG00000080198.2	RP23-10L17.3	chr2	60274944	60275574	-	653.774355267	739.759545109359	714.836349803395	592.038068524968	429.152926098074	381.45499594139	467.089554401149	411.784750970369	400.991322903493	702.790083393251	467.548663521477	426.62187609167	714.836349803395	429.152926098074	411.784750970369	0.665274986897982	-0.587977302797582	0.607040261626673	-0.720135889241892	1.09593222880351	0.13215858644431	1
LOF down	ENSMUSG00000054091.9	AC155158.1	chr3	122924203	122926184	+	2782.04337250225	3908.53313884851	4341.96893954655	2788.96955702291	2486.78793783616	2068.25598716845	2292.22455950892	2349.3894857063	2443.43437837228	3677.5151502991	2448.00449400917	2361.6828078625	3908.53313884851	2486.78793783616	2349.3894857063	0.665668092165458	-0.587125078468311	0.642195262654572	-0.638916072255889	1.03655092286707	0.0517909937875781	1
LOF down	ENSMUSG00000059058.7	Tma7-ps	chr1	171711088	171711282	+	3877.6991446774	4888.98302271676	4617.45642170301	3100.06084353909	3073.04148866656	2742.50977204345	2067.74271396091	2401.88329248722	2427.53103978687	4461.37952969906	2971.87070141637	2299.052348745	4617.45642170301	3073.04148866656	2401.88329248722	0.666132679731203	-0.586118534218615	0.515323193967334	-0.956450567273957	1.29265029699678	0.370332033055342	1
LOF down	ENSMUSG00000003824.12	Syce2	chr8	84872111	84888221	+	987.666258135504	1118.79944866667	1212.14492148844	757.229953225417	730.581767047911	726.747591655921	872.830033000356	659.088907360506	836.061228490002	1106.20354276354	738.18643730975	789.326722950288	1118.79944866667	730.581767047911	836.061228490002	0.667315199032539	-0.583559731274478	0.713545647285108	-0.486922369453524	0.935210244182042	-0.0966373618209536	1
LOF down	ENSMUSG00000102915.1	WI1-2736D10.3	chr1	191992861	191993092	+	248.08401873971	295.01939160211	336.309393801397	198.953729748716	208.190258791625	180.812001134298	218.904656838747	170.313239778113	182.888393732188	293.137601381072	195.985329891546	190.702096783016	295.01939160211	198.953729748716	182.888393732188	0.668577927117476	-0.580832369252741	0.650554878952931	-0.620257331174546	1.0277041165129	0.0394249619218054	1
LOF down	ENSMUSG00000106895.1	RP23-477O15.1	chr5	41342123	41342931	+	6046.82905911684	5281.28932289858	5364.49260708313	3774.09196432413	3881.5349476549	3512.41893816369	3775.75675617406	3042.30773521451	3775.90696127822	5564.20366303285	3722.68195004757	3531.3238175556	5364.49260708313	3774.09196432413	3775.75675617406	0.669041281644689	-0.579832863113859	0.634650352757001	-0.655966106580137	1.05418878085908	0.0761332434662778	1
LOF down	ENSMUSG00000042787.14	Exog	chr9	119444904	119465517	+	934.54709177006	945.7045593755	1054.00795121161	654.738637900321	660.333520216381	656.755849281354	832.395414858167	717.415359339312	659.988551294418	978.086534119057	657.276002466019	736.599775163966	945.7045593755	656.755849281354	717.415359339312	0.672001893020656	-0.5734627978243	0.753102869192864	-0.409081153312766	0.892310892057645	-0.164381644511533	1
LOF down	ENSMUSG00000020096.20	Tbata	chr10	61171954	61188841	+	20139.1687777382	17819.9293325745	19343.514558794	12354.4237273051	13904.043909237	12346.5433548736	15690.0261363467	13095.4549982815	15456.9091522601	19100.8708897022	12868.3369971386	14747.4634289628	19343.514558794	12354.4237273051	15456.9091522601	0.67370420288408	-0.569812795323033	0.772083299977359	-0.373171586796732	0.872579685253957	-0.196641208526301	1
LOF down	ENSMUSG00000015748.13	Prpf3	chr3	95830124	95855885	-	2573.6527967609	2321.61940928855	2658.99086673615	1601.27607943209	1671.90827459041	1833.78365021366	1924.13010469727	1916.60721202356	1945.88707120024	2518.08769092853	1702.32266807872	1928.87479597369	2573.6527967609	1671.90827459041	1924.13010469727	0.67603788152866	-0.564824005240373	0.766007793502388	-0.384569024421139	0.882547001823098	-0.180254980819234	1
LOF down	ENSMUSG00000030609.18	Aen	chr7	78895854	78911209	+	1514.18810496661	1720.20942897761	1549.88541909325	1050.23453703716	1120.14022675003	1066.20754217257	1291.11918619541	1068.54060025172	1195.02229941778	1594.76098434582	1078.86076865325	1184.89402862164	1549.88541909325	1066.20754217257	1195.02229941778	0.676503111904137	-0.563831524294804	0.742991608305294	-0.428582178503984	0.910512453091076	-0.13524934579082	1
LOF down	ENSMUSG00000020288.13	Ahsa2	chr11	23487882	23498030	-	1788.53984333758	1646.29664778394	1743.08443255362	1118.96400731399	1125.24919015596	1261.01789178178	1165.6324402369	998.548857877156	1083.69892931992	1725.97364122505	1168.41036308391	1082.62674247799	1743.08443255362	1125.24919015596	1083.69892931992	0.676957246145779	-0.562863372935208	0.627255664060764	-0.672874501791006	1.07923656163302	0.110011128855799	1
LOF down	ENSMUSG00000092230.1	RP23-244N5.1	chr15	36119998	36120926	-	1249.1760002423	1298.8434028564	1339.51315999195	740.349030701283	924.72237647323	968.219102848177	659.502564870876	587.930635946363	736.097385953154	1295.84418769688	877.763503340897	661.176862256798	1298.8434028564	924.72237647323	659.502564870876	0.677368090758623	-0.561988068475405	0.510228674507476	-0.97078411518008	1.32757746595188	0.408796046704675	1
LOF down	ENSMUSG00000001774.8	Chordc1	chr9	18292125	18317442	+	8270.82932123047	6800.60760299082	7593.43678089452	4630.19589233376	4918.65451905857	5809.31461708906	5004.13256939022	4395.48142112281	4933.44281974468	7554.95790170527	5119.38834282713	4777.68560341924	7593.43678089452	4918.65451905857	4933.44281974468	0.677619704759917	-0.561452266932013	0.632390764525748	-0.661111796245783	1.07152055781221	0.0996595293137703	1
LOF down	ENSMUSG00000024966.8	Stip1	chr19	7020696	7040026	-	10488.9923123149	10620.698097676	10685.3365481623	6242.32399338851	7875.46709024024	7542.77676989917	6687.04926241167	5826.8125526827	6310.21756013854	10598.3423193844	7220.18928450931	6274.69312507764	10620.698097676	7542.77676989917	6310.21756013854	0.681256470769354	-0.553730066914072	0.592044768510751	-0.756221822974952	1.15068404790234	0.20249175606088	1
LOF down	ENSMUSG00000046372.4	RP23-9C7.1	chr7	39445830	39449221	-	452.388504760648	414.416961222664	412.873447283843	272.506320746726	298.874359246873	300.964492210638	262.12786933557	177.31241401557	220.374834683506	426.559637755718	290.781724068079	219.938372678215	414.416961222664	298.874359246873	220.374834683506	0.681690667213581	-0.552810863137797	0.515609901197847	-0.955648127014251	1.32210546312222	0.402837263876454	1
LOF down	ENSMUSG00000044768.16	AC099860.1	chr1	97606318	97662074	-	2899.95624729148	2791.62888969962	2897.98520190565	1732.70611908427	1874.98956997611	2247.90145926318	2216.93251193381	1824.45141789705	2317.34362244512	2863.19011296558	1951.86571610785	2119.57585075866	2897.98520190565	1874.98956997611	2216.93251193381	0.681710134185322	-0.552769664829032	0.740284705916117	-0.43384787168735	0.920875615472417	-0.118921793141682	1
LOF down	ENSMUSG00000074516.6	RP23-350M23.6	chr9	7751725	7752204	+	3077.99301368115	3357.03007917261	3540.55080963683	2403.11989932843	2376.94522460868	2027.42747078329	2338.23636636038	2341.22378242927	2284.4009925182	3325.1913008302	2269.16419824013	2321.28704710262	3357.03007917261	2376.94522460868	2338.23636636038	0.682416135779494	-0.551276335197985	0.698091278695173	-0.518512407003834	0.97754571157947	-0.03276392819415	1
LOF down	ENSMUSG00000094772.2	RP23-324B8.3	chr13	4609334	4615025	+	685.295618824517	848.417650795789	807.142545123353	605.301650508215	549.213566137416	450.280209276381	564.690356813329	592.596752104667	536.169700879458	780.28527158122	534.931808640671	564.485603265818	807.142545123353	549.213566137416	564.690356813329	0.685559279565345	-0.544646675217899	0.723434907494676	-0.467064881667766	0.947644732736912	-0.0775817935501332	1
LOF down	ENSMUSG00000039108.14	Lsm14b	chr2	180024987	180035465	+	4582.84148500109	4352.64155918316	4917.98822041915	3200.14059850359	3292.72691512153	3006.14533498765	3445.30832514997	3811.05037229517	3736.1486148147	4617.8237548678	3166.33761620426	3664.16910408661	4582.84148500109	3200.14059850359	3736.1486148147	0.685677449873767	-0.544398018345308	0.793483965303806	-0.333727025463221	0.864135231278728	-0.210670992882087	1
LOF down	ENSMUSG00000030357.10	Fkbp4	chr6	128429735	128438677	-	10333.720902939	10951.0945469434	11712.1535271091	6966.99788174595	8110.479406913	7578.93917012603	7593.34242766763	6061.2848896375	6420.40497748029	10998.9896589972	7552.13881959499	6691.67743159514	10951.0945469434	7578.93917012603	6420.40497748029	0.68662114009875	-0.542413818358113	0.608390192104722	-0.716931199411956	1.12858680006558	0.174517381053843	1
LOF down	ENSMUSG00000047557.2	Lxn	chr3	67457998	67463926	-	991.168620753006	1079.00025879316	1072.61230065594	728.291228898331	742.076934711252	690.585191429061	609.307866487469	706.916597983127	658.852598538317	1047.59372673404	720.317785012881	658.359021002971	1072.61230065594	728.291228898331	658.852598538317	0.687592686583314	-0.540373894873739	0.628448800524477	-0.670132881249116	1.0941109061064	0.129758986375377	1
LOF down	ENSMUSG00000034883.9	Lrr1	chr12	69168814	69179009	+	609.411095445311	651.948634118581	837.195724994967	426.846183824518	499.401172929603	517.938893571796	511.707064075289	426.949628484859	452.109196928018	699.518484852953	481.395416775306	463.588629829389	651.948634118581	499.401172929603	452.109196928018	0.688181123443079	-0.539139774867906	0.662725345888237	-0.593516998638828	1.03841074996268	0.0543772237709218	1
LOF down	ENSMUSG00000103423.1	RP23-349K2.1	chr3	33621608	33622403	+	719.1517907937	773.241403256921	786.391539973905	513.662356805776	554.322529543345	501.60748701773	501.946983834071	494.608312780273	508.906834733045	759.594911341509	523.19745778895	501.82071044913	773.241403256921	513.662356805776	501.946983834071	0.688784837782733	-0.537874709841948	0.660642538485246	-0.598058227767901	1.04259837606281	0.0601835179259521	1
LOF down	ENSMUSG00000112673.1	RP24-418P10.4	chr10	59871221	59871682	-	1641.4406134025	1919.2053783452	1889.77257240317	1327.56397850507	1329.60772639314	1107.03605855773	1134.95790233593	1187.52656228849	1308.61757502783	1816.80618805029	1254.73592115198	1210.36734655075	1889.77257240317	1327.56397850507	1187.52656228849	0.690627282868572	-0.534020766659406	0.666206089846963	-0.585959553015811	1.03665711465835	0.0519387863564044	1
LOF down	ENSMUSG00000081800.3	RP23-132A3.2	chr2	158468169	158468360	-	1107.9140413364	1508.57881615811	1308.02887631692	924.833398286456	923.445135621748	866.731076405055	651.136781806975	736.07982397253	758.816441075165	1308.17391127048	905.003203437753	715.344348951557	1308.02887631692	923.445135621748	736.07982397253	0.691806491201792	-0.531559544344055	0.546826643452036	-0.870844556698915	1.26512945096186	0.33928501235486	1
LOF down	ENSMUSG00000098893.1	RP23-292F17.4	chr9	72292542	72293340	-	2915.71687907024	2888.91579827933	3247.89008183945	2143.87716056495	2245.38941690599	1875.7786956384	2083.07998291139	2008.76300615007	1931.11968537093	3017.50758639634	2088.34842436978	2007.6542248108	2915.71687907024	2143.87716056495	2008.76300615007	0.692077273901336	-0.530994963889212	0.665335270029408	-0.587846580560377	1.04019327559585	0.0568516166711652	1
LOF down	ENSMUSG00000078240.2	Gm3550	chr18	34736359	34738014	+	448.302415040229	440.949754471676	505.1796426038	272.506320746726	370.399846929885	323.128543962584	344.391402797265	293.965317973181	330.562252025259	464.810604038568	322.011570546398	322.972990931902	448.302415040229	323.128543962584	330.562252025259	0.692780172716711	-0.529530453986412	0.694848585909418	-0.525229459722328	0.997023217381957	-0.00430099426408352	1
LOF down	ENSMUSG00000081911.1	Mrps36-ps2	chr7	105690259	105690567	-	382.924979513529	484.539343380767	450.797698074213	295.416144172336	328.250898830967	290.465730854453	308.139676187027	303.29755028979	306.707244147148	439.42067365617	304.710924619252	306.048156874655	450.797698074213	295.416144172336	306.707244147148	0.693437844159506	-0.528161521554872	0.69648101516982	-0.521844066818396	0.995630647578281	-0.00631745473647571	1
LOF down	ENSMUSG00000023944.14	Hsp90ab1	chr17	45567775	45573271	-	64117.1687115023	61721.5944289279	63631.1684110277	40386.4013588091	47621.9251475199	43470.704659804	48469.9527750661	40848.3473788369	42399.4366214529	63156.643850486	43826.3437220443	43905.912258452	63631.1684110277	43470.704659804	42399.4366214529	0.693930852719102	-0.527136183394102	0.695190712831301	-0.524519285810023	0.998187748931414	-0.00261689758407899	1
LOF down	ENSMUSG00000062896.3	Rpl31-ps11	chr3	94604408	94604784	-	11347.6548807058	12104.0075869302	12230.2131039436	10376.9442316209	7659.61338633972	6793.8651264913	6535.07087008414	6790.36553937257	7173.54165477495	11893.9585238599	8276.80758148397	6832.99268807722	12104.0075869302	7659.61338633972	6790.36553937257	0.695883339838481	-0.523082626662939	0.574492728755519	-0.799639461815346	1.2113005178428	0.276556835152407	1
LOF down	ENSMUSG00000101597.2	RP23-435I22.2	chr9	105560122	105560761	-	2186.64172752695	2036.07601527537	2153.81122413235	1539.78129023703	1533.96626263032	1367.17203438321	1422.1831208632	1475.65923506379	1496.04977978442	2125.50965564489	1480.30652908352	1464.6307119038	2153.81122413235	1533.96626263032	1475.65923506379	0.696447802602142	-0.521912865174896	0.689072716284334	-0.537271859581476	1.01070291442909	0.0153589944065797	1
LOF down	ENSMUSG00000091825.1	RP24-174M12.2	chr10	73201695	73202766	+	6349.78342553074	5616.73963754681	6427.80273301691	3681.2468904414	4402.6492150597	4727.942197402	4400.40189161202	3716.56152008951	4128.05231566939	6131.44193203149	4270.61276763437	4081.67190912364	6349.78342553074	4402.6492150597	4128.05231566939	0.696510350252867	-0.521783303227331	0.665695272722136	-0.587066171553239	1.04629006512954	0.065282868325908	1
LOF down	ENSMUSG00000027636.11	Sla2	chr2	156872457	156887192	-	6721.61759008885	5467.65060881426	6683.25476192563	4181.64566526393	4656.82014450469	4309.15827219417	4701.57008191246	4650.95128078998	4663.08606379274	6290.84098694291	4382.54136065426	4671.86914216506	6683.25476192563	4309.15827219417	4663.08606379274	0.696654289903455	-0.521485189113832	0.742646198157266	-0.429253030463248	0.938070229985784	-0.0922321586505848	1
LOF down	ENSMUSG00000081929.1	Rps11-ps2	chr11	116382750	116383205	+	10617.4122749567	10137.4222206404	11662.0648939897	8934.8311359878	7239.40114620203	6434.57418230186	7279.62556277134	7448.2879176935	7230.33929257998	10805.6331298623	7536.26882149723	7319.41759101494	10617.4122749567	7239.40114620203	7279.62556277134	0.697438894225469	-0.5198612734433	0.677370543960735	-0.561982843522886	1.02962684227069	0.042121570079586	1
LOF down	ENSMUSG00000063556.5	RP23-411P20.1	chr14	77251847	77252314	-	13189.3138904088	16270.9195933703	16491.3246785974	11967.3682894304	10719.8824664915	9375.39389107325	9973.40770934752	10152.3022314309	10448.4934506128	15317.1860541255	10687.5482156651	10191.4011304637	16270.9195933703	10719.8824664915	10152.3022314309	0.697748801764178	-0.519220353117141	0.665357272181127	-0.587798872477301	1.0486829120795	0.0685785193601604	1
LOF down	ENSMUSG00000071532.6	RP23-378J3.1	chr10	14523078	14523545	+	14010.0341971101	16884.9642371332	17068.7750632734	12417.1242966805	11193.7388223914	9863.00302961607	10376.3595935921	10611.9146730239	10791.5511829552	15987.9244991722	11157.955382896	10593.2751498571	16884.9642371332	11193.7388223914	10611.9146730239	0.697898928874332	-0.518909977320437	0.66257975826728	-0.593833964956931	1.05330553818821	0.074923987636494	1
LOF down	ENSMUSG00000043895.6	S1pr2	chr9	20962361	20976781	-	574.387469270293	531.287598152836	574.588177069195	400.319019858023	395.944663959532	376.788879783086	402.951884244573	465.445086790871	435.069905586509	560.087748164108	391.017521200214	434.488958873984	574.387469270293	395.944663959532	435.069905586509	0.698136180414437	-0.518419614834034	0.775751585886641	-0.366333353796012	0.899948118851097	-0.152086261038022	1
LOF down	ENSMUSG00000112186.1	RP23-212M22.2	chr12	54731716	54732141	-	692.30034405952	736.600879246381	868.680008669991	573.951365820539	550.490806988898	479.443435265784	486.609714883585	458.445912553414	482.779921342732	765.860410658631	534.628536025074	475.945182926577	736.600879246381	550.490806988898	482.779921342732	0.698075691842198	-0.518544619591533	0.621451606980533	-0.686286043251535	1.12329855454709	0.167741423660002	1
LOF down	ENSMUSG00000082662.1	RP23-291I12.3	chr14	45713132	45713324	-	3532.71642685347	3036.74136066668	3721.58544076822	2557.45976240622	2394.82659652943	2237.40269790699	2189.04656838747	2228.07046559038	2243.50669329858	3430.34774276279	2396.56301894755	2220.20790909214	3532.71642685347	2394.82659652943	2228.07046559038	0.698635589935078	-0.517387956427416	0.64722531812591	-0.627660050746994	1.07943179966759	0.110272094319578	1
LOF down	ENSMUSG00000037979.13	Ccdc92	chr5	124834418	124862424	-	510.761215052344	528.760665462454	527.361751556659	364.145614449165	371.677087781367	359.290944189444	411.317667308474	403.619047693336	357.825118171672	522.294544023819	365.037882139992	390.920611057827	527.361751556659	364.145614449165	403.619047693336	0.698911919178203	-0.516817444396441	0.748467728661549	-0.417987981280537	0.933790319093698	-0.0988294631159035	1
LOF down	ENSMUSG00000082693.3	RP23-39I7.5	chrX	159584783	159585058	-	897.772284286292	904.64190315679	908.035363263772	596.861189246149	671.828687879722	629.925681371103	645.559593097707	612.427745777461	633.861637904105	903.483183568951	632.871852832325	630.616325593091	904.64190315679	629.925681371103	633.861637904105	0.700479947321594	-0.513584343751295	0.697983467829497	-0.518735229172863	1.00357670289793	0.00515088542156737	1
LOF down	ENSMUSG00000062248.5	Cks2	chr13	51645232	51650660	+	3658.80148108353	4599.64922966801	4585.25658612628	2798.61579846527	3268.45933894336	2932.65400549436	2796.96013769763	2462.54280254518	2940.98168554432	4281.23576562594	2999.909714301	2733.49487526238	4585.25658612628	2932.65400549436	2796.96013769763	0.700711168113488	-0.513108204430727	0.638482677644062	-0.647280615469954	1.0974630834137	0.134172411039227	1
LOF down	ENSMUSG00000083553.1	RP23-145C12.1	chr11	8383182	8383853	-	642.683540311578	670.900629296447	807.142545123353	572.745585640244	495.569450375156	417.61739616825	469.878148755783	444.4475640785	433.933952830409	706.908904910459	495.310810727883	449.419888554897	670.900629296447	495.569450375156	444.4475640785	0.700671341508453	-0.513190205804656	0.635753610448327	-0.653460344875471	1.10211146266924	0.140270139070815	1
LOF down	ENSMUSG00000100895.1	RP23-6J21.3	chr5	10235871	10236971	-	800.873585202075	885.058174806329	941.666302643911	564.305124378177	710.145913424193	568.099642273569	665.079753580143	610.094687698309	661.124504050518	875.866020884105	614.183560025313	645.432981776323	885.058174806329	568.099642273569	661.124504050518	0.701230034481018	-0.512040305194849	0.736908347152021	-0.440442899355055	0.951583785407112	-0.0715974058397941	1
LOF down	ENSMUSG00000025353.5	Ormdl2	chr10	128817902	128821645	-	1572.5608152583	1744.84702270884	1813.92407082243	1179.25301632875	1309.17187276942	1109.36911663689	1243.71308216664	1121.03440703265	1139.36061436885	1710.44396959652	1199.26466857835	1168.03603452271	1744.84702270884	1179.25301632875	1139.36061436885	0.701142329065154	-0.512220759647576	0.682884710218389	-0.550286062544445	1.02673601938009	0.038065302896869	1
LOF down	ENSMUSG00000101932.1	RP23-108F2.9	chr17	36226023	36226271	+	1450.56185074866	1939.42083986826	1960.61221067197	1333.59287940655	1227.42845827455	1199.19185268425	902.11027372401	961.21992861072	1033.7170080515	1783.53163376296	1253.40439678845	965.682403462077	1939.42083986826	1227.42845827455	961.21992861072	0.70276544192489	-0.508884845472494	0.541443944801048	-0.885116110227587	1.29794681180361	0.376231264755093	1
LOF down	ENSMUSG00000057605.4	Gm6807	chr19	45450308	45451195	-	6613.62807604921	7446.87063855604	7756.58261448328	5406.7183284439	5319.70814642404	4620.621525761	5202.12276856921	5228.38315538015	5092.47620559875	7272.36044302951	5115.68266687631	5174.32737651604	7446.87063855604	5319.70814642404	5202.12276856921	0.703441847657544	-0.507496931644113	0.711505901976515	-0.491052370859521	0.98866621584365	-0.0164445607845919	1
LOF down	ENSMUSG00000096712.1	AC122771.3	chr1	134518081	134518563	+	1124.25840021807	1350.01378983663	1396.04176022665	948.949001892361	943.880989245465	829.402147138619	902.11027372401	929.723644542165	903.082441099935	1290.10465009378	907.410712758815	911.63878645537	1350.01378983663	943.880989245465	903.082441099935	0.703362097557629	-0.507660501094101	0.706639408197698	-0.500953886522044	0.995362117365591	-0.00670661457205762	1
LOF down	ENSMUSG00000096942.1	Rps19-ps6	chr12	110898114	110898551	+	21273.3505387059	23342.5407274046	25641.8023976023	18888.5465243251	16647.5572582211	13934.1893777367	15915.902279072	16301.0767990367	16489.4902075555	23419.2312212376	16490.0977200943	16235.4897618881	23342.5407274046	16647.5572582211	16301.0767990367	0.704126346604424	-0.506093769341882	0.693254599543174	-0.528542811727745	1.01568218525837	0.0224490423858624	1
LOF down	ENSMUSG00000050947.9	Amigo1	chr3	108186335	108192286	+	297.700822487652	265.959665662716	275.487482156463	191.719048666945	194.140609425319	206.475640004973	192.413010469727	170.313239778113	201.063637829797	279.715990102277	197.445099365746	187.929962692546	275.487482156463	194.140609425319	192.413010469727	0.705877055128492	-0.502511168334607	0.671859919855958	-0.573767626757526	1.05063129123676	0.0712564584229199	1
LOF down	ENSMUSG00000032322.14	Pstpip1	chr9	56089962	56128888	+	5558.83320107825	5523.87486117526	6419.21611019645	4285.34276076932	4286.42029757481	3801.71813997856	4046.25040857354	4929.75172124867	4585.84127637791	5833.97472414999	4124.49373277423	4520.61446873337	5558.83320107825	4285.34276076932	4585.84127637791	0.706978334290808	-0.500262091295613	0.774877280496279	-0.367960250098423	0.912374581221448	-0.13230184119719	1
LOF down	ENSMUSG00000090489.3	RP24-266K12.5	chr1	93421700	93422488	+	479.823678597745	441.581487644271	484.428637454353	344.853131564441	355.072956712097	295.131847012758	322.082647960195	306.797137408519	316.930818952053	468.61126789879	331.685978429765	315.270201440256	479.823678597745	344.853131564441	316.930818952053	0.707806237602897	-0.498573619194982	0.672775545611395	-0.571802828156304	1.0520689139491	0.0732292089613216	1
LOF down	ENSMUSG00000032011.5	Thy1	chr9	44043384	44048579	+	71285.3375353226	77662.1175730308	78928.952517581	51425.3189094121	59597.3353710185	50770.8433894713	52152.2916203599	46255.2094772722	50487.4202448888	75958.8025419781	53931.1658899673	49631.640447507	77662.1175730308	51425.3189094121	50487.4202448888	0.710005477774121	-0.49409793966853	0.653402091483451	-0.613957022162238	1.08662871917376	0.119859082493708	1
LOF down	ENSMUSG00000031988.10	Vps26b	chr9	27007771	27030065	-	4607.94175042652	3612.25028090121	4092.95687775317	2703.35916422195	2806.09815070675	3240.61767194245	3293.32993282243	2823.0002757742	2901.2233390808	4104.38296969363	2916.69166229038	3005.85118255914	4092.95687775317	2806.09815070675	2901.2233390808	0.710628536329809	-0.492832471522357	0.732351538526999	-0.449391767214631	0.970338012478432	-0.0434407043077262	1
LOF down	ENSMUSG00000027472.14	Pdrg1	chr2	153008890	153015427	-	3865.44087551614	4072.15203055075	4564.50558097683	3271.28162914101	3046.21943078543	2578.02917746322	2933.60126107468	3191.62345228026	3171.58009503273	4167.36616234791	2965.17674579655	3098.93493612922	4072.15203055075	3046.21943078543	3171.58009503273	0.71152296925259	-0.49101776457	0.743619546592295	-0.427363401820472	0.956837367324742	-0.0636543627495288	1
LOF down	ENSMUSG00000029623.14	Pdap1	chr5	145128769	145140238	-	4231.43776904508	4166.91200644008	4214.60070104304	2756.41349215494	3420.45100026976	2800.83622402226	3038.17354937344	2672.51802966888	2994.37146508104	4204.3168255094	2992.56690548232	2901.68768137445	4214.60070104304	2800.83622402226	2994.37146508104	0.711784346823039	-0.49048788866103	0.690168653268152	-0.534979145312105	1.03131943685436	0.0444912566510757	1
LOF down	ENSMUSG00000082185.1	RP23-112E4.7	chr3	98821038	98821764	+	1571.97708815539	1461.83056138604	1479.04578082444	936.891200089409	1138.02159867078	1142.03192974502	1183.75830354202	933.223231660893	1128.00108680784	1504.28447678862	1072.31490950174	1081.66087400358	1479.04578082444	1138.02159867078	1128.00108680784	0.712840507262919	-0.48834877434784	0.719053404255514	-0.475829170963529	0.991359616746369	-0.0125196033843108	1
LOF down	ENSMUSG00000049235.8	RP23-299A24.2	chr14	43697828	43715378	+	3052.30902115281	2913.55339201056	3130.53956995981	1871.37083981823	2401.21280078684	2212.90558807589	2311.74471999136	2139.4142585826	2233.28311849367	3032.13399437439	2161.82974289365	2228.14736568921	3052.30902115281	2212.90558807589	2233.28311849367	0.712973023917993	-0.488080603065298	0.734844624222794	-0.44448885658434	0.970236428785291	-0.0435917464809577	1
LOF down	ENSMUSG00000094446.1	RP23-335A11.4	chr13	55085777	55086259	+	2550.30371264422	2914.18512518315	2975.26480728981	2130.61357858171	2076.79362451032	1823.28488885747	1928.31299622922	1890.94357315289	1947.02302395634	2813.25121503906	2010.2306973165	1922.09319777948	2914.18512518315	2076.79362451032	1928.31299622922	0.714557834924312	-0.48487730990393	0.683228425355109	-0.549560096120766	1.04585495627311	0.0646827862168359	1
LOF down	ENSMUSG00000022814.6	Umps	chr16	33954782	33967038	-	2283.54042661117	2056.92320997103	2096.56707199594	1433.67263437105	1633.59104904594	1537.48527416132	1805.61484462534	1362.5059182249	1639.17982705309	2145.67690285938	1534.91631919277	1602.43352996778	2096.56707199594	1537.48527416132	1639.17982705309	0.715352957916126	-0.483272846015464	0.746819583056674	-0.421168336567585	0.957865827497778	-0.0621045094478792	1
LOF down	ENSMUSG00000027634.14	Ndrg3	chr2	156927345	156992056	-	10117.1581477568	9234.67551700137	9092.5180149667	6440.07194295693	6909.87300651958	6999.1742374567	7317.2715865589	6450.90558885593	6891.82537126202	9481.45055990829	6783.03972897774	6886.66751555895	9234.67551700137	6909.87300651958	6891.82537126202	0.71540105452423	-0.483175849973632	0.726330583284248	-0.461301766621198	0.984952404577818	-0.0218740833524346	1
LOF down	ENSMUSG00000105461.1	RP24-461L18.3	chr14	52368918	52369688	-	1051.29251235345	943.177626685118	957.408444481424	676.442681145635	713.97763597864	722.081475497616	747.343287041838	604.262042500428	620.230204830899	983.959527839997	704.167264207297	657.278511457722	957.408444481424	713.97763597864	620.230204830899	0.715646573140153	-0.482680816144895	0.667993441661762	-0.582094156452257	1.07133772355586	0.0994133403073616	1
LOF down	ENSMUSG00000046721.11	Rpl14-ps1	chr7	45324965	45325617	+	18746.9796372812	18517.36275512	20246.5410587458	15313.4082897497	14047.094884603	11792.442061075	13579.0602098889	14084.671623842	14420.9202386964	19170.2944837157	13717.6484118092	14028.2173574758	18746.9796372812	14047.094884603	14084.671623842	0.715567954548731	-0.482839314608803	0.731768485319416	-0.450540809645469	0.977861125348116	-0.032298504963334	1
LOF down	ENSMUSG00000084353.1	AC163389.1	chr1	8791923	8792162	-	2698.57039678513	3032.95096163111	3103.34859769502	1870.16505963793	2254.33010286637	2211.73905903632	2023.12520428677	1719.4638043352	2065.16211059079	2944.95665203709	2112.07807384687	1935.91703973759	3032.95096163111	2211.73905903632	2023.12520428677	0.717184774990119	-0.479583233116374	0.657366905009781	-0.605229268800942	1.09099616899553	0.125646035684568	1
LOF down	ENSMUSG00000099492.1	RP23-313K8.2	chr1	29484604	29485915	-	2839.83235569103	2531.98655576286	2721.24388218449	1953.3638920783	2065.29845684698	1788.28901767019	2016.15371840018	1847.78199868857	1849.33108693169	2697.68759787946	1935.65045553182	1904.42226800681	2721.24388218449	1953.3638920783	1849.33108693169	0.717522094498028	-0.478904837828011	0.705946184985912	-0.502369885347158	1.01639772231696	0.0234650475191465	1
LOF down	ENSMUSG00000050428.7	Fbxo46	chr7	19119859	19140172	+	1142.3539404085	1022.14427325956	1118.40762236507	706.587185653016	831.483794315017	817.736856742858	775.229230588176	892.394715275729	761.088346587366	1094.30194534438	785.26927890363	809.570764150424	1118.40762236507	817.736856742858	775.229230588176	0.717598357788267	-0.478751506209668	0.739805651990916	-0.434781772435569	0.969982259336779	-0.0439697337740986	1
LOF down	ENSMUSG00000025980.14	Hspd1	chr1	55077835	55088243	-	8505.48761660309	8613.68180833997	8951.5542903308	5632.19922215911	6711.90067453981	6363.41591088772	7209.9107039055	5699.66088736891	6360.19948140696	8690.24123842462	6235.83860252888	6423.25702422712	8613.68180833997	6363.41591088772	6360.19948140696	0.717567951388577	-0.478812638026615	0.739134489825916	-0.436091199864266	0.97082190219209	-0.0427214381623495	1
LOF down	ENSMUSG00000029402.8	Snrnp35	chr5	124483134	124491124	+	569.133925344041	698.065155718054	595.339182218643	418.405722562452	484.074282711815	435.115331761892	450.357988273347	430.449215603587	457.78896070852	620.846087760246	445.865112345386	446.198721528485	595.339182218643	435.115331761892	450.357988273347	0.718157239186095	-0.47762834086939	0.718694585220282	-0.476549278322042	0.999252330481908	-0.00107906254734827	1
LOF down	ENSMUSG00000038412.8	Higd1a	chr9	121848563	121858362	-	1336.15133857693	1486.46815511727	1669.382586678	1180.45879650905	1053.72370247295	990.383154600123	1041.5399914557	1045.2100194602	1050.75629939301	1497.33402679073	1074.85521786071	1045.83543676964	1486.46815511727	1053.72370247295	1045.2100194602	0.717845984014981	-0.478253752138104	0.698465017195393	-0.517740235204795	1.02774794204785	0.039486483066691	1
LOF down	ENSMUSG00000114738.1	RP23-79G18.4	chr13	100909097	100909889	-	2636.69532387593	2727.19210609488	2972.40259968298	2083.58815155019	2122.77429516369	1781.28984343273	1978.50769461263	1930.60556049847	2000.41280349306	2778.76334321793	1995.88409671554	1969.84201953472	2727.19210609488	2083.58815155019	1978.50769461263	0.718263432395871	-0.477415026733176	0.708891609766795	-0.49636304006882	1.01322038870253	0.0189480133356438	1
LOF down	ENSMUSG00000102973.1	RP24-146B4.3	chr17	51745529	51748684	-	377.671435587276	346.189778582347	337.740497604807	265.271639664955	232.45783496979	264.802091983778	231.453331434599	261.30250486505	272.628661464131	353.867237258143	254.177188872841	255.12816592126	346.189778582347	264.802091983778	261.30250486505	0.718284040201836	-0.477373634742951	0.720971423910448	-0.471986016280755	0.996272551699711	-0.00538761846219625	1
LOF down	ENSMUSG00000025868.6	Higd2a	chr13	54590207	54591158	+	2190.72781724737	2692.44678160212	2835.73218645731	1994.36041820834	2014.20882278768	1542.15139031963	1773.54600954705	1938.77126377551	1866.3703782732	2572.9689284356	1850.24021043855	1859.56255053192	2692.44678160212	1994.36041820834	1866.3703782732	0.719107094528157	-0.475721451845687	0.722730278621188	-0.468470757942003	0.994986810155591	-0.00725069390368389	1
LOF down	ENSMUSG00000081295.1	RP23-389M3.6	chrX	136929786	136930907	+	1535.78600777453	1286.84047257708	1305.88222061181	920.010277565275	1062.66438843333	990.383154600123	1045.72288298765	885.395541038273	1060.97987419791	1376.16956698781	991.019273532909	997.366099407944	1305.88222061181	990.383154600123	1045.72288298765	0.720128752521447	-0.473673224418611	0.724740702986917	-0.464463173452293	0.993636413069581	-0.00921005096631862	1
LOF down	ENSMUSG00000071014.10	Ndufb6	chr4	40270591	40279421	-	2722.50320800472	3385.45807193941	3793.14063093873	2549.01930114416	2421.64865441056	2158.07872321582	2069.13701113822	2158.07872321582	2163.99000037154	3300.36730362762	2376.24889292351	2130.40191157519	3385.45807193941	2421.64865441056	2158.07872321582	0.719995283649685	-0.473940638717824	0.64550448952562	-0.631500965282358	1.11539934320024	0.157560326564533	1
LOF down	ENSMUSG00000072082.6	Ccnf	chr17	24223232	24251409	-	5402.97806459942	5152.41575568909	5192.76015067391	3390.65386699024	3996.48662428831	3962.69914744007	4527.28293474785	3186.95733612195	3866.78318176626	5249.38465698747	3783.27987957287	3860.34115087869	5192.76015067391	3962.69914744007	3866.78318176626	0.720709211990578	-0.472510809124897	0.735389270005233	-0.443419968418459	0.980037704364996	-0.0290908407064385	1
LOF down	ENSMUSG00000095847.1	RP24-94N16.2	chr13	66874081	66874659	+	6762.47848729303	6564.33939644009	7726.52943461167	5644.25702396206	5103.85444252352	4432.81035038924	4723.87883674953	4772.27030090589	4488.14933935326	7017.78243944826	5060.30727229161	4661.43282566956	6762.47848729303	5103.85444252352	4723.87883674953	0.721069271661469	-0.471790231978953	0.664231595363626	-0.590241746045092	1.08556906460724	0.118451514066139	1
LOF down	ENSMUSG00000072423.5	Psmb11	chr14	54621433	54629556	+	7956.78413986114	7302.20374203166	8568.01847101687	5118.53686535334	6635.26622345087	5450.02367289962	6493.24195476463	4950.74924396104	5749.05689862487	7942.33545096989	5734.60892056794	5731.01603245018	7956.78413986114	5450.02367289962	5749.05689862487	0.722030560906068	-0.469868192491632	0.721578189164791	-0.470772363360794	1.0006269199209	0.000904170869162157	1
LOF down	ENSMUSG00000030870.12	Ubfd1	chr7	122067175	122082194	+	3982.77002320245	3410.72739884323	3808.16722087454	2545.40196060327	2604.29409617254	2953.65152820673	2933.60126107468	2634.02257136287	2549.07798468963	3733.88821430674	2701.11586166085	2705.56727237573	3808.16722087454	2604.29409617254	2634.02257136287	0.723405658292412	-0.467123212461165	0.724597823258097	-0.46474762304519	0.998354721850634	-0.00237558941597543	1
LOF down	ENSMUSG00000006456.10	Rbm14	chr19	4800569	4811634	-	3518.12324928055	3895.8984753966	3730.88761549039	2713.00540566431	2765.22644345931	2594.36058401728	3099.52262517539	2699.34819757913	2684.25636266559	3714.96978005585	2690.8641443803	2827.7090618067	3730.88761549039	2713.00540566431	2699.34819757913	0.724330022501515	-0.465280920585156	0.761166100727795	-0.393716783670762	0.951605729431383	-0.0715641369143946	1
LOF down	ENSMUSG00000085442.1	AC122291.2	chr15	37943327	37943792	-	10985.7440768973	13759.1484991305	14048.4304861762	10367.2979901786	9308.53132560345	8425.83925285829	8641.85390500992	8792.12937128519	9018.32893068224	12931.1076874013	9367.22285621345	8817.43740232578	13759.1484991305	9308.53132560345	8792.12937128519	0.724394466634893	-0.465152568738554	0.681877965560254	-0.552414529002327	1.06235206770423	0.0872619602637735	1
LOF down	ENSMUSG00000078812.10	Eif5a	chr11	69916714	69921958	-	27052.8325846867	34383.3413848566	37298.1428763783	25844.6923844484	24639.2532659462	21069.8475128238	23432.5583619872	23290.9188041767	23770.94737416	32911.4389486405	23851.2643877395	23498.1415134413	34383.3413848566	24639.2532659462	23432.5583619872	0.724710469966391	-0.464523357651119	0.713980982421066	-0.486042447708918	1.01502769374745	0.0215190900577992	1
LOF down	ENSMUSG00000080893.1	AC122339.3	chr5	130188395	130188796	+	1549.21173114162	1880.03792164428	1881.90150148441	1399.91078932278	1346.21185746241	1108.20258759731	1291.11918619541	1258.68483370263	1276.81089785701	1770.3837180901	1284.7750781275	1275.53830591835	1880.03792164428	1346.21185746241	1276.81089785701	0.725704300711441	-0.462546275038965	0.720486916415163	-0.472955862675188	1.00724146986907	0.0104095876362229	1
LOF down	ENSMUSG00000094497.1	AC161207.2	chr1	43189156	43189638	+	1168.03793293685	1386.02258067458	1384.59292979937	973.064605498266	1062.66438843333	824.736030980314	946.72778339815	1007.88109019376	951.928409612258	1312.88448113693	953.488341637303	968.845761068056	1384.59292979937	973.064605498266	951.928409612258	0.726254560349133	-0.461452777268753	0.73795202471207	-0.438401067165068	0.98414874684096	-0.0230517101036852	1
LOF down	ENSMUSG00000024097.10	Srsf7	chr17	80200089	80207305	-	18991.5612934034	17932.3778372965	20486.250945817	12834.3242390626	14070.0852199297	14796.2543379835	14595.5028521529	14169.8282437311	15097.9480813324	19136.7300255056	13900.2212656586	14621.0930590721	18991.5612934034	14070.0852199297	14595.5028521529	0.726363451181693	-0.461236483290323	0.764032989940548	-0.38829316160529	0.950696449950693	-0.0729433216850332	1
LOF down	ENSMUSG00000014226.10	Cacybp	chr1	160202367	160212875	-	7423.84129489796	6919.37343943878	7375.90900277617	4883.40973019576	5204.75646979062	5691.49518409187	4510.55136862005	4218.16900710724	4728.97132364658	7239.70791237097	5259.88712802608	4485.89723312462	7375.90900277617	5204.75646979062	4510.55136862005	0.726533057920495	-0.460899651588203	0.619624063211069	-0.690534922352571	1.17253848108383	0.229635270764368	1
LOF down	ENSMUSG00000112239.1	RP23-349H12.3	chr10	53299137	53300142	-	2289.37769764034	2401.84952220818	2349.15689329784	1534.95816951585	1910.75231381761	1671.63611371258	1501.65805997026	1570.14808726945	1709.60889793132	2346.79470438212	1705.78219901535	1593.80501505701	2349.15689329784	1671.63611371258	1570.14808726945	0.726856165062149	-0.460258192203135	0.679141218480224	-0.55821649977287	1.07025776861063	0.0979583075697344	1
LOF down	ENSMUSG00000058546.8	Rpl23a	chr11	78180932	78183584	-	6793.99975085055	7621.2289941924	7817.40452612822	5825.12405100635	5425.71913709707	4930.91825028824	5029.22991858192	5020.74098633561	5273.09269381874	7410.87775705706	5393.92047946389	5107.68786624542	7621.2289941924	5425.71913709707	5029.22991858192	0.727838274531986	-0.458310175302193	0.689214966659191	-0.536974064115929	1.05603956637798	0.0786638888137353	1
LOF down	ENSMUSG00000094111.1	Nutf2-ps2	chr18	10483083	10483466	-	1105.57913292473	1132.69757846377	1200.69609106116	751.201052323941	928.554099027677	824.736030980314	858.887061227187	680.086430072876	798.574787538684	1146.32426748322	834.830394110644	779.182759612916	1132.69757846377	824.736030980314	798.574787538684	0.728267225768091	-0.457460173926763	0.67972281641008	-0.556981543987912	1.07141794888451	0.099521370061149	1
LOF down	ENSMUSG00000045382.6	Cxcr4	chr1	128588199	128592293	-	15068.9151618014	15278.4667792228	14969.3457836707	10479.435546946	12090.361900132	10441.6014332458	12060.6705837909	10783.3944418416	11832.0839075433	15105.5759082316	11003.7996267746	11558.7163110586	15068.9151618014	10479.435546946	11832.0839075433	0.728459457198066	-0.457079414329812	0.765195341195816	-0.386100004860099	0.951991495478344	-0.0709794094697132	1
LOF down	ENSMUSG00000031578.5	Mak16	chr8	31159463	31168764	-	2815.31581736852	2314.67034439	2585.28902086053	1774.90842539461	1896.70266445131	1958.6022574483	1949.22745388897	1890.94357315289	1898.17705544401	2571.75839420635	1876.73778243141	1912.78269416196	2585.28902086053	1896.70266445131	1898.17705544401	0.729748870134658	-0.454528022873266	0.743764538096218	-0.427082131466034	0.981155772769921	-0.0274458914072315	1
LOF down	ENSMUSG00000022403.15	St13	chr15	81363669	81400077	-	9358.89664106769	8247.90830140716	8402.01042982128	5397.07208700154	6552.24556810452	7052.8345732772	5327.60951452773	5032.40627673137	5177.67266230629	8669.60512409871	6334.05074279442	5179.2294845218	8402.01042982128	6552.24556810452	5177.67266230629	0.730604295366095	-0.452837859275103	0.597400851640314	-0.743228800565774	1.22297163346861	0.290390941290671	1
LOF down	ENSMUSG00000009630.10	Ppp2cb	chr8	33599625	33619441	+	3985.10493161412	3943.91019651386	4299.75137734595	3059.06431740905	3043.66494908247	2835.83209520954	2360.54512119745	2536.03413203848	2371.86935473794	4076.25550182464	2979.52045390035	2422.81620265796	3985.10493161412	3043.66494908247	2371.86935473794	0.730945460255531	-0.452164331875626	0.594372997858804	-0.750559518613912	1.22977568444179	0.298395186738286	1
LOF down	ENSMUSG00000071646.9	Mta2	chr19	8941875	8952303	+	17759.3133791457	16178.0548169988	17193.9966460718	11157.0840082719	13216.8883311395	13033.628959184	12702.0472853566	13258.7690638221	13905.1976874268	17043.7882807388	12469.2004328651	13288.6713455352	17193.9966460718	13033.628959184	13258.7690638221	0.731597942163868	-0.450877077802589	0.779678269094244	-0.359049170060936	0.938333119138704	-0.0918279077416525	1
LOF down	ENSMUSG00000024048.14	Myl12a	chr17	70993656	71002878	-	9848.05995331211	9914.42041071416	10536.5017526076	7474.63133765025	7964.87394984401	6733.20561643335	7038.41215109552	7772.58299069567	7447.30626899518	10099.6607055446	7390.90363464254	7419.43380359546	9914.42041071416	7474.63133765025	7447.30626899518	0.73179722073089	-0.450484158365017	0.734622084831251	-0.444925826645734	0.9961546703282	-0.00555833171928277	1
LOF down	ENSMUSG00000020680.15	Taf15	chr11	83473086	83506743	+	7318.7704163729	8496.8111714098	7661.4142115565	5325.93105636412	6281.47050759025	5573.67575109469	6480.69328016878	5899.13735313642	6286.36255226043	7825.6652664464	5727.02577168302	6222.06439518854	7661.4142115565	5573.67575109469	6286.36255226043	0.731826059087707	-0.450427306366355	0.795084402838758	-0.330820075882173	0.920438203132656	-0.119607230484182	1
LOF down	ENSMUSG00000091931.5	RP24-234J3.2	chr12	102753275	102757803	-	732.577514160791	819.357924856395	773.511605743213	559.482003656996	550.490806988898	592.596752104667	586.999111650399	575.098816511025	597.511149708888	775.149014920133	567.52318758352	586.536359290104	773.511605743213	559.482003656996	586.999111650399	0.732147208678314	-0.449794342719565	0.756675617204438	-0.402253137803974	0.967583984512749	-0.0475412049155912	1
LOF down	ENSMUSG00000030079.15	Ruvbl1	chr6	88465409	88497572	+	1388.68677783946	1487.09988828986	1569.20532043928	1106.90620551104	1150.79400718561	998.548857877156	1118.22633620812	1125.70052319095	1110.96179546633	1481.66399552287	1085.41635685794	1118.29621828847	1487.09988828986	1106.90620551104	1118.22633620812	0.732565790987518	-0.448969762561855	0.754756963567728	-0.40591593243858	0.970598253939503	-0.0430538301232748	1
LOF down	ENSMUSG00000024826.14	Dpf2	chr19	5896516	5913010	-	4497.61732797521	4177.6514703742	4397.06643597784	3022.89091200019	3401.29238749753	3156.62758109297	3381.17065499339	3555.580512628	3519.18163839949	4357.44507810908	3193.60362686356	3485.31093534029	4397.06643597784	3156.62758109297	3519.18163839949	0.732907373384366	-0.448297216314141	0.799851948301032	-0.322195111410651	0.916303792146955	-0.12610210490349	1
LOF down	ENSMUSG00000020423.6	Btg2	chr1	134075170	134079120	-	29217.2926823028	28636.4647137551	28865.3637147837	20050.9186181297	22766.8181776731	20759.5507882966	22043.8383733796	22656.3270066473	24588.8333585524	28906.3737036139	21192.4291946998	23096.3329128598	28865.3637147837	20759.5507882966	22656.3270066473	0.733140359008447	-0.44783866752359	0.799004854419781	-0.323723826494975	0.917566839491654	-0.124114841028614	1
LOF down	ENSMUSG00000027997.9	Casp6	chr3	129901425	129914103	+	2453.98874066292	2593.89640667722	2668.29304145832	1867.75349927734	2010.37710023324	1782.45637247231	1709.40833939047	1769.62455303697	1973.14993734665	2572.05939626615	1886.8623239943	1817.39427659136	2593.89640667722	1867.75349927734	1769.62455303697	0.733599825390287	-0.44693479934125	0.706591099423935	-0.501052518455039	1.03822398270849	0.0541177191137885	1
LOF down	ENSMUSG00000083833.4	RP23-265I19.1	chr5	115801677	115802159	-	2052.38449385605	2391.74179144665	2446.47195192974	1782.14310647638	1781.75098781789	1491.99064161785	1721.95701398633	1666.96999755427	1740.27962234604	2296.86607907748	1685.29491197071	1709.73554462888	2391.74179144665	1781.75098781789	1721.95701398633	0.733736689013925	-0.446665668886531	0.744377550003082	-0.425893549683239	0.985705021612873	-0.0207721192032921	1
LOF down	ENSMUSG00000009073.16	Nf2	chr11	4765845	4849536	-	3477.84607917928	2771.41342817656	2844.31880927777	1970.24481460244	2286.26112415343	2417.04817000171	2346.60214942428	2226.90393655081	2355.96601615253	3031.1927722112	2224.51803625253	2309.82403404254	2844.31880927777	2286.26112415343	2346.60214942428	0.733875475240652	-0.446392809058144	0.762018191392546	-0.392102655805843	0.963068183319266	-0.0542901532523003	1
LOF down	ENSMUSG00000028882.13	Ppp1r8	chr4	132826929	132843169	-	5012.46463274797	4997.64112840319	5735.14849216638	3766.85728324236	4226.38997755514	3562.57968686546	3969.56406382111	3655.90201003155	3610.05785888754	5248.41808443918	3851.94231588765	3745.17464424673	5012.46463274797	3766.85728324236	3655.90201003155	0.733924442358759	-0.446296549864177	0.713581613353298	-0.486849652647308	1.02850806218208	0.0405531027831312	1
LOF down	ENSMUSG00000038900.17	Rpl12	chr2	32961559	32965345	+	6550.58554893418	6964.22649469306	7586.99681377917	5716.60383477978	5042.54688165236	4731.44178452073	4485.45401942835	5192.22075515329	5287.86007964805	7033.93628580214	5163.53083365096	4988.51161807656	6964.22649469306	5042.54688165236	5192.22075515329	0.734088371552845	-0.44597434581513	0.70920625598298	-0.495722832429929	1.03508445584053	0.0497484866147987	1
LOF down	ENSMUSG00000035790.15	Cep19	chr16	32099800	32108069	+	1595.32617227206	1805.49340727801	1814.63962272413	1215.42642173761	1306.61739106646	1307.67905336483	1299.48496925932	1230.6881367528	1308.61757502783	1738.48640075807	1276.57428872297	1279.59689367998	1805.49340727801	1306.61739106646	1299.48496925932	0.73430214246503	-0.445554285573485	0.736040784168352	-0.442142386366956	0.997637845971692	-0.00341189920652816	1
LOF down	ENSMUSG00000052456.9	Asna1	chr8	85017931	85025281	-	2066.39394432605	2162.42264979448	2274.02394361881	1616.95122177593	1706.39377758044	1454.66171235142	1462.61773900539	1689.13404930622	1618.73267744328	2167.61351257978	1592.6689039026	1590.16148858496	2162.42264979448	1616.95122177593	1618.73267744328	0.734756862632345	-0.444661166169767	0.733600099536396	-0.446934260206501	1.00157683061477	0.00227309403673401	1
LOF down	ENSMUSG00000025132.13	Arhgdia	chr11	120578104	120581624	-	18013.2346689146	19795.9906964533	20381.0648162664	15397.8129023703	15091.8779011156	12267.2193801824	14987.300358979	15395.8502643256	14378.8899867207	19396.7633938781	14252.3033945561	14920.6802033418	19795.9906964533	15091.8779011156	14987.300358979	0.734777401009816	-0.444620839630862	0.769235562673871	-0.378502633162171	0.955204668977761	-0.0661182064686908	1
LOF down	ENSMUSG00000027933.11	Ints3	chr3	90391388	90433622	-	3086.16519312199	2631.16866386036	2784.21244953454	1806.25871008228	2263.27078882675	2184.90889112607	2112.36022363505	2008.76300615007	1994.73303971256	2833.84876883896	2084.81279667837	2038.61875649923	2784.21244953454	2184.90889112607	2008.76300615007	0.735682446996817	-0.442844925077507	0.719381633528191	-0.475170768269287	1.02265947962652	0.0323258431917797	1
LOF down	ENSMUSG00000037070.10	Rbmxl1	chr8	78505269	78508898	-	5036.98117107049	5015.32965723587	5418.15899971102	3435.26773366117	4139.53759965433	3808.71731421602	4000.23860172208	3753.89044935594	4033.76823691304	5156.82327600579	3794.50754917717	3929.29909599702	5036.98117107049	3808.71731421602	4000.23860172208	0.735822685030269	-0.442569940353887	0.761961169830984	-0.392210616223447	0.965695778425937	-0.0503593241304405	1
LOF down	ENSMUSG00000055612.15	Cdca7	chr2	72476159	72486893	+	16408.5688629959	17789.60614029	20364.6071225271	12638.9878498548	14450.7029936714	13077.9570626878	14106.1045429147	11442.4833492021	13768.8833566947	18187.5940419377	13389.215968738	13105.8237496038	17789.60614029	13077.9570626878	13768.8833566947	0.736173016500402	-0.441883224375511	0.720591394297889	-0.472746672484157	1.02162338091436	0.0308634481086451	1
LOF down	ENSMUSG00000078125.2	RP23-345I5.10	chr14	50769248	50769730	+	981.245260003418	880.004309425565	932.364127921745	712.616086554493	615.630090414498	729.080649735073	718.063046318184	631.092210410679	619.094252074798	931.204565783576	685.775608901355	656.08316960122	932.364127921745	712.616086554493	631.092210410679	0.736439268126116	-0.44136153932882	0.704553213878574	-0.505219419581073	1.04525712695569	0.063857880252252	1
LOF down	ENSMUSG00000024212.8	Mllt1	chr17	56892612	56935388	-	3792.47498765152	3102.44161061662	3291.53874784346	2218.63553174326	2657.93821193479	2634.02257136287	2409.34552240354	2464.87586062433	2444.57033112838	3395.48511537053	2503.53210501364	2439.59723805208	3291.53874784346	2634.02257136287	2444.57033112838	0.737312054080508	-0.439652751561993	0.718482677779567	-0.476974720365877	1.02620714024607	0.0373219688038834	1
LOF down	ENSMUSG00000081675.1	RP23-48A2.6	chr11	72572530	72573330	-	729.075151543289	753.025941733865	815.729167943814	548.629982034339	638.620425741181	507.440132215611	567.478951167963	515.605835492644	521.402315050151	765.943420406989	564.89684666371	534.829033903586	753.025941733865	548.629982034339	521.402315050151	0.737517722083896	-0.439250378060624	0.698261803227451	-0.518160039251758	1.05621948483362	0.0789096611911342	1
LOF down	ENSMUSG00000111356.1	RP23-288C18.3	chr10	20208490	20208888	+	19751.5739814013	19354.4092088091	21495.8946791229	16638.5607078942	14905.4007367992	13140.949630825	13995.9550659067	14457.9609165064	15084.3166482592	20200.6259564444	14894.9703585061	14512.7442102241	19751.5739814013	14905.4007367992	14457.9609165064	0.737351921203923	-0.439574745857341	0.718430420993673	-0.477079654486053	1.02633727589664	0.0375049086287122	1
LOF down	ENSMUSG00000045969.8	Ing1	chr8	11555571	11563251	+	5782.40068149545	5282.55278924377	5451.07438718945	3747.56480035764	4189.34999286215	4248.49876213622	4248.42349928448	4225.16818134469	4616.51200079262	5505.34261930956	4061.804518452	4363.36789380726	5451.07438718945	4189.34999286215	4248.42349928448	0.737793230925455	-0.438711542172165	0.792569726451374	-0.335390232719735	0.930887474378849	-0.103321309452429	1
LOF down	ENSMUSG00000115584.1	RP24-134B24.2	chr14	101981991	101982763	-	3437.568909078	3741.75558128329	3967.01974305307	2827.55452279236	2931.26775415202	2470.70850582222	2702.14792964008	2589.69446785898	2527.49488232372	3715.44807780479	2743.17692758887	2606.44575994093	3741.75558128329	2827.55452279236	2589.69446785898	0.738316582588238	-0.437688533079938	0.701515861710253	-0.511452370440601	1.05245885786284	0.0737638373606633	1
LOF down	ENSMUSG00000021276.10	Cinp	chr12	110872610	110889145	-	1152.86102826101	1245.14608318578	1396.04176022665	970.653045137676	969.425806275113	863.231489286326	973.21942976717	940.22240589835	970.103653709867	1264.68295722448	934.436780233038	961.181829791796	1245.14608318578	969.425806275113	970.103653709867	0.738870382410931	-0.436606795542027	0.760018014239111	-0.395894480613472	0.972174828185682	-0.0407123149285545	1
LOF down	ENSMUSG00000031165.6	Was	chrX	8081453	8090498	-	4805.24151121245	4474.5660614941	4211.73849343622	2932.45739847805	3692.50330163551	3352.60445974176	3229.19226266585	3196.28956843856	3290.85513442328	4497.18202204759	3325.85505328511	3238.77898850923	4474.5660614941	3352.60445974176	3229.19226266585	0.739542014750568	-0.435295983059375	0.720179653087423	-0.473571254599014	1.02688546056548	0.0382752715396389	1
LOF down	ENSMUSG00000115457.1	RP23-71O17.3	chr15	52089308	52089953	+	2222.8328079078	2190.85064256128	2334.13030336204	1778.52576593549	1665.522070333	1545.65097743835	1649.45356076585	1634.30718444614	1660.762929419	2249.27125127704	1663.23293790228	1648.17455821033	2222.8328079078	1665.522070333	1649.45356076585	0.739454139627654	-0.435467419616284	0.732759358069671	-0.448588607196705	1.00913639857923	0.0131211875804212	1
LOF down	ENSMUSG00000084153.2	RP23-269N23.5	chr11	48996674	48997713	-	817.21794408375	804.828061886698	767.071638627867	543.806861313158	607.966645305604	615.92733289619	627.433729792588	557.600880917384	570.248283562475	796.372548199438	589.233613171651	585.094298090816	804.828061886698	607.966645305604	570.248283562475	0.73989694208305	-0.434603758605089	0.73469923017021	-0.444774331942827	1.00707461189477	0.0101705733377382	1
LOF down	ENSMUSG00000042797.9	Aqp11	chr7	97724006	97738289	-	8025.08021090243	9259.94484390519	8274.64219131777	5300.60967257792	7005.66607038075	6608.3870091987	5832.34509271644	5448.85714386004	5833.11740257631	8519.8890820418	6304.88758405246	5704.77321305093	8274.64219131777	6608.3870091987	5832.34509271644	0.740019913796987	-0.434364000970638	0.669583037773982	-0.578665113637869	1.10519513196925	0.144301112667231	1
LOF down	ENSMUSG00000017697.3	Ada	chr2	163726584	163750239	-	3559.56787358765	3600.87908379449	3611.39044790564	2587.60426691361	2854.63330306308	2534.8676029989	2734.21676471837	2338.89072435011	2654.72159100698	3590.61246842926	2659.03505765853	2575.94302669182	3600.87908379449	2587.60426691361	2654.72159100698	0.740551947902566	-0.433327154305377	0.717410483403876	-0.479129267567562	1.03225693662698	0.0458021132621848	1
LOF down	ENSMUSG00000090323.2	RP23-285F13.3	chr1	146420436	146421036	+	1777.44902838216	1847.81952984191	2035.0296084493	1383.02986679865	1412.62838173949	1397.50178941219	1461.22344182807	1214.35673019874	1266.58732305211	1886.76605555779	1397.72001265011	1314.05583169297	1847.81952984191	1397.50178941219	1266.58732305211	0.740801970934811	-0.432840157933253	0.696459334649465	-0.521888976680052	1.06366866531793	0.0890488187467988	1
LOF down	ENSMUSG00000016831.12	Tox4	chr14	52279146	52296401	+	4931.91029254543	4362.11755677209	4608.86979888255	3116.94176606322	3481.75856114092	3703.72970065417	3549.88061344873	3409.76438268099	3331.7494336429	4634.29921606669	3434.14334261944	3430.46480992421	4608.86979888255	3481.75856114092	3409.76438268099	0.741027538902447	-0.432400936297236	0.740233776453428	-0.433947128379057	1.00107231319925	0.00154619208182154	1
LOF down	ENSMUSG00000031060.16	Rbm10	chrX	20617503	20650901	+	3002.69221740487	2871.22726944666	2932.3316931875	1990.74307766746	2313.08318203456	2223.40434943208	2205.77813451528	2193.0745944031	2225.33144920097	2935.41706001301	2175.74353637803	2208.06139270645	2932.3316931875	2223.40434943208	2205.77813451528	0.74120422818841	-0.432056983666474	0.752213858393486	-0.410785208807758	0.985363696663885	-0.0212717748587165	1
LOF down	ENSMUSG00000078126.4	Rpl23a-ps3	chr14	34170655	34171122	+	16375.8801452325	20102.3812851622	20533.4773713295	15420.7227257959	14173.5417288998	12668.5053697966	13109.1820611331	13297.2645221282	13484.8951676696	19003.9129339081	14087.5899414974	13297.113916977	20102.3812851622	14173.5417288998	13297.2645221282	0.741299436094627	-0.431871680955053	0.699704001129755	-0.515183353422559	1.05944718752174	0.0833116724675063	1
LOF down	ENSMUSG00000018189.12	Uchl5	chr1	143777272	143807466	+	3253.11114455624	3520.64897087486	3545.55967294877	2347.65401103485	2573.64031573696	2740.1767139643	2727.24527883178	2428.71346039748	2613.82729178736	3439.77326279329	2553.82368024537	2589.92867700554	3520.64897087486	2573.64031573696	2613.82729178736	0.742439540381659	-0.429654548223761	0.752935870808639	-0.409401102242825	0.986059462918525	-0.0202534459809362	1
LOF down	ENSMUSG00000002015.5	Bcap31	chrX	73686178	73716175	-	3879.45032598615	4291.3634414414	4661.82063960873	3177.23077507798	3342.53930832934	3028.3093867396	3202.70061629683	3199.78915555729	3055.71291391047	4277.54480234543	3182.69315671564	3152.7342285882	4291.3634414414	3177.23077507798	3199.78915555729	0.744046714594441	-0.426534891836294	0.737042947360719	-0.44017940753568	1.00950252255829	0.0136445156993856	1
LOF down	ENSMUSG00000029687.16	Ezh2	chr6	47530139	47595341	-	10922.7015497822	10232.1821965297	11642.7449926437	6918.76667453414	8620.09850665446	8891.28433964916	8516.3671590514	7273.30856175709	8231.11367070456	10932.5429129852	8143.38317361259	8006.92979717102	10922.7015497822	8620.09850665446	8231.11367070456	0.744875482166206	-0.424928818675561	0.732394088081807	-0.44930794920471	1.01704190993279	0.0243791305291492	1
LOF down	ENSMUSG00000062647.16	Rpl7a	chr2	26910764	26913318	+	9408.51344481564	9829.13643241376	11137.5653500399	7969.00121157131	8121.97457457634	6541.89485394286	7540.35913492959	7373.63005916063	7216.70785950677	10125.0717424231	7544.2902133635	7376.89901786566	9829.13643241376	7969.00121157131	7373.63005916063	0.745109803198098	-0.424475050713159	0.728577456588001	-0.456845738527299	1.02269126838966	0.0323706878141404	1
LOF down	ENSMUSG00000062797.13	l7Rn6	chr7	89917529	89941204	-	1767.52566763257	1976.69309705139	1936.99899791571	1299.83103435828	1553.12487540255	1384.66996997685	1133.56360515861	1102.36994239943	1181.39086634457	1893.73925419989	1412.54195991256	1139.10813796754	1936.99899791571	1384.66996997685	1133.56360515861	0.745900977011412	-0.422943978424176	0.60151266096494	-0.733332990538222	1.24004202308035	0.310389012114046	1
LOF down	ENSMUSG00000084131.1	Rpl3-ps2	chrX	74170653	74171866	+	13665.0514792861	12978.958030975	14376.8688090589	11337.9510353162	10206.4316441956	9065.097166546	10737.4825625172	9859.50344249734	10123.6109623681	13673.62610644	10203.1599486859	10240.1989891275	13665.0514792861	10206.4316441956	10123.6109623681	0.746192697479161	-0.422379853416872	0.748901491778002	-0.417152131436706	0.996382976494799	-0.00522772198016676	1
LOF down	ENSMUSG00000020923.17	Ubtf	chr11	102304560	102319742	-	11888.7699051098	11621.3634430673	12984.4048083407	8750.34676840263	9282.98650857381	9203.91412225556	8640.4596078326	9201.58106417641	8954.71557634061	12164.8460521726	9079.08246641067	8932.25208278321	11888.7699051098	9203.91412225556	8954.71557634061	0.746337637769709	-0.422099651890487	0.734267580902755	-0.44562219081995	1.01643822658235	0.0235225389294627	1
LOF down	ENSMUSG00000029203.16	Ube2k	chr5	65537233	65598988	+	3345.92375392004	3930.01206671676	4185.97862497483	2887.84353180712	2890.39604690458	2776.33911419116	2610.12431593717	2873.16102447598	2956.88502412972	3820.63814853721	2851.52623096762	2813.39012151429	3930.01206671676	2887.84353180712	2873.16102447598	0.746348154446233	-0.422079322954354	0.736366547193547	-0.441504007708265	1.01355521552511	0.0194246847539106	1
LOF down	ENSMUSG00000096370.8	RP24-245M20.2	chr19	4742913	4811612	-	2485.51000422044	2502.29509665087	2425.00539487858	1871.37083981823	1876.26681082759	1787.12248863061	1691.28247608535	1816.28571462001	1740.27962234604	2470.93683191663	1844.92004642548	1749.28260435047	2485.51000422044	1871.37083981823	1740.27962234604	0.746648001112367	-0.421499834115801	0.707943069104523	-0.498294747605904	1.05467237931547	0.0767949134901034	1
LOF down	ENSMUSG00000013701.13	Timm23	chr14	32180162	32201898	-	1873.18027326054	2018.3874864427	2125.90469996585	1460.19979833755	1592.71934179851	1439.49683483693	1295.30207772737	1339.17533743338	1369.95902385726	2005.82415322303	1497.47199165766	1334.81214633934	2018.3874864427	1460.19979833755	1339.17533743338	0.746561950234507	-0.42166611371336	0.665468178850331	-0.587558413442033	1.12185972817554	0.165892299728673	1
LOF down	ENSMUSG00000090602.3	RP23-192E11.1	chr9	17030045	17030896	+	3560.15160069057	3885.15901146247	4359.85773708917	2939.69207955982	2978.52566565687	2896.4916052675	3033.99065784149	2540.70024819678	2839.88189025137	3935.05611641407	2938.2364501614	2804.85759876321	3885.15901146247	2939.69207955982	2839.88189025137	0.746682223388201	-0.421433710351837	0.712787191792126	-0.488456681854691	1.0475528067653	0.0670229715028535	1
LOF down	ENSMUSG00000005505.12	Kbtbd4	chr2	90904740	90911626	+	970.738172150912	811.777126785248	900.164292345015	614.947891950577	711.423154275676	677.753371993724	666.47405075746	650.923204083473	727.00976390435	894.226530427058	668.041472739992	681.469006248428	900.164292345015	677.753371993724	666.47405075746	0.747060671998799	-0.420702679667629	0.762076479572773	-0.391992305615401	0.980296193392044	-0.0287103740522281	1
LOF down	ENSMUSG00000082743.1	RP23-110F21.5	chr4	135756218	135756695	-	2517.03126777795	2537.04042114362	2682.60407949242	1856.90147765468	1896.70266445131	2023.92788366456	1546.2755696444	1481.49188026167	1697.11341761422	2578.89192280466	1925.84400859018	1574.96028917343	2537.04042114362	1896.70266445131	1546.2755696444	0.746771895154001	-0.421260462295032	0.610712017532161	-0.711435860213047	1.22278893114245	0.290175397918015	1
LOF down	ENSMUSG00000031157.10	Pqbp1	chrX	7894519	7899269	-	2819.98563419186	3156.77066345983	3378.12052794978	2479.08405068703	2447.19347144021	2062.42334197057	2205.77813451528	2481.2072671784	2441.16247286008	3118.29227520049	2329.56695469927	2376.04929151792	3156.77066345983	2447.19347144021	2441.16247286008	0.74706497951655	-0.420694361177826	0.761971323347216	-0.392191391713723	0.980437132771368	-0.028502969464103	1
LOF down	ENSMUSG00000022508.5	Bcl6	chr16	23965052	23988852	-	6180.50256568482	5739.92760620293	5491.86084558664	3737.91855891527	4964.63518971194	4307.9917431546	4372.51594806568	4291.66033660053	4740.33085120758	5804.0970058248	4336.8484972606	4468.16904529126	5739.92760620293	4307.9917431546	4372.51594806568	0.747204688844499	-0.420424586639197	0.769830180441016	-0.377387863178621	0.970609762813461	-0.0430367234605758	1
LOF down	ENSMUSG00000004266.15	Ptpn6	chr6	124720707	124738714	-	9317.45201676059	8770.98336831626	9707.89265043309	6799.39443668491	7035.04260996485	6932.68208220086	5959.22613585227	7071.49903791042	6647.5955287004	9265.44267850331	6922.37304295021	6559.44023415436	9317.45201676059	6932.68208220086	6647.5955287004	0.747117356735772	-0.420593216421092	0.707946771865836	-0.498287201884156	1.05532984459651	0.0776939854630634	1
LOF down	ENSMUSG00000043618.9	Eif5al3-ps	chr5	90132229	90132675	+	6233.62173205027	6603.50685314101	7292.18943027667	5224.64552121932	5181.76613446394	4640.45251943379	5301.11786815871	4666.11615830447	5167.44908750139	6709.77267182265	5015.62139170568	5044.89437132152	6603.50685314101	5181.76613446394	5167.44908750139	0.747509884018654	-0.419835439281742	0.751872621930591	-0.411439825636878	0.994197503959202	-0.00839561364486401	1
LOF down	ENSMUSG00000070713.5	RP23-39F24.2	chr8	72304110	72305260	-	11231.4931872253	12423.032839091	12170.1067442003	8398.25895575641	9576.75190441475	8811.96036495799	9382.22570616517	7193.98458706591	8567.35568651032	11941.5442568389	8928.99040837638	8381.1886599138	12170.1067442003	8811.96036495799	8567.35568651032	0.747724935429753	-0.419420449472204	0.701851325059063	-0.510762641731666	1.06536086594526	0.091342192259461	1
LOF down	ENSMUSG00000038861.14	Pi4kb	chr3	94974731	95006843	+	2723.08693510764	2737.29983685641	2737.70157592371	2124.58467768023	2041.03088066881	1970.26754784406	2261.55002160795	2315.56014355859	2294.6245673231	2732.69611596259	2045.29436873103	2290.57824416321	2737.29983685641	2041.03088066881	2294.6245673231	0.748452913144564	-0.418016538937218	0.838211841698455	-0.254613191840495	0.892916176927287	-0.163403347096722	1
LOF down	ENSMUSG00000081201.1	Smt3h2-ps4	chr1	14839869	14840156	-	2463.32837430959	2193.37757525166	2175.99333308521	1469.84603977991	1831.56338102571	1813.95265654086	1689.88817890804	1442.99642195566	1670.9865042239	2277.56642754882	1705.12069244883	1601.29036836253	2193.37757525166	1813.95265654086	1670.9865042239	0.748659038798673	-0.417619272105601	0.703070764037335	-0.508258191097601	1.06484165903806	0.0906389189919997	1
LOF down	ENSMUSG00000046691.13	Chtf8	chr8	106883863	106893601	-	9758.1659794629	9001.56597631362	9918.26490953439	6704.13780244159	7552.3251548152	7212.64905169913	7087.21255230161	6548.89402818032	6819.12439487158	9559.33228843697	7156.37066965197	6818.41032511784	9758.1659794629	7212.64905169913	6819.12439487158	0.748626625136608	-0.417681735843353	0.713272655388853	-0.487474428617606	1.04956585603086	0.0697926927742529	1
LOF down	ENSMUSG00000027342.14	Pcna	chr2	132249162	132253314	-	15591.3509189121	15512.8397862557	17087.3794127178	11241.4886208926	12366.2459240522	12478.3611363457	13241.6402929782	10225.7935609242	12262.6100021054	16063.8567059619	12028.6985604302	11910.0146186693	15591.3509189121	12366.2459240522	12262.6100021054	0.748805145651348	-0.417337745996793	0.741416886160908	-0.431643121215085	1.00996505424728	0.0143053752182922	1
LOF down	ENSMUSG00000101188.1	Eif4a-ps4	chr1	60703932	60705149	+	36443.2504893119	32267.0352566616	36782.9455071507	25302.0913033155	26935.7323169115	26774.174516351	27855.2690084363	23553.3878380814	25775.9039886775	35164.4104177081	26337.3327121927	25728.1869450651	36443.2504893119	26774.174516351	25775.9039886775	0.748976945705586	-0.417006783183457	0.731654153715283	-0.450766234118531	1.02367620261887	0.0337594509350734	1
LOF down	ENSMUSG00000059586.10	Nsmce2	chr15	59374247	59601684	+	1308.13243763692	1242.6191504954	1388.17068930789	1002.00332982535	963.039602017701	988.050096520971	1038.75139710106	1025.37902578741	1080.29107105162	1312.97409248007	984.364342788007	1048.14049798003	1308.13243763692	988.050096520971	1038.75139710106	0.749721070983698	-0.415574145087193	0.798294881813093	-0.325006333469784	0.9391530474064	-0.0905678116174094	1
LOF down	ENSMUSG00000037148.8	Arhgap10	chr8	77250366	77517953	-	835.897211377093	900.219770948622	820.738031255749	630.623034294416	701.205227463817	586.764106906787	692.965697126481	601.928984421276	595.239244196687	852.285004527155	639.530789555007	630.044641914815	835.897211377093	630.623034294416	601.928984421276	0.750371983735437	-0.414322131213832	0.739241730839042	-0.435881894444001	1.01505631031376	0.0215597632301699	1
LOF down	ENSMUSG00000039231.18	Suv39h1	chrX	8061171	8074760	-	4122.2808007996	4090.47229255602	4364.1510484994	2956.57300208395	3362.97516195306	3119.29865182654	3354.67900862437	2905.82383758411	3296.53489820379	4192.30138061834	3146.28227195452	3185.67924813742	4122.2808007996	3119.29865182654	3296.53489820379	0.750490479167425	-0.414094325166737	0.759887937175823	-0.396141418964392	0.987633100160369	-0.0179529062023454	1
LOF down	ENSMUSG00000009293.17	Ube2g2	chr10	77622275	77645993	+	2625.60450892051	2614.74360137287	3083.31314444728	2108.90953533639	2149.59635304481	1987.7654834377	2078.89709137944	2044.92540637693	1959.51850427344	2774.55375158022	2082.09045727297	2027.78033400994	2625.60450892051	2108.90953533639	2044.92540637693	0.750423543276872	-0.414223004192956	0.730849179928496	-0.452354376560058	1.02678304072297	0.0381313723671024	1
LOF down	ENSMUSG00000046598.15	Bdh1	chr16	31422280	31458901	+	2831.07644914728	2506.08549568644	3032.50895942621	2012.44712091277	2217.29011817338	2053.09110965397	2091.44576597529	2114.9171487515	2348.01434685983	2789.89030141998	2094.27611624671	2184.79242052887	2831.07644914728	2053.09110965397	2114.9171487515	0.750666115861537	-0.413756731887544	0.78311051134049	-0.352712182118419	0.958569837833722	-0.0610445497691251	1
LOF down	ENSMUSG00000020623.11	Map2k6	chr11	110399122	110525522	+	865.667293625859	734.073946555999	745.605081576714	576.362926181129	578.59010572151	606.595100579581	638.588107211123	565.766584194417	565.704472538072	781.782107252857	587.182710827407	590.019721314537	745.605081576714	578.59010572151	565.766584194417	0.751082309738115	-0.412957076170349	0.754711211526491	-0.406003388728301	0.995191668372016	-0.00695368744204765	1
LOF down	ENSMUSG00000031913.9	Vps4a	chr8	107031222	107045755	+	2927.39142112858	2992.520038585	3282.952125023	2329.56730833042	2401.21280078684	2193.0745944031	2247.60704983478	2411.21552480383	2257.13812637179	3067.62119491219	2307.95156784012	2305.32023367013	2992.520038585	2329.56730833042	2257.13812637179	0.752358723974126	-0.410507393223613	0.75150094721396	-0.412153172329194	1.00114141806919	0.00164577910558112	1
LOF down	ENSMUSG00000026279.14	Thap4	chr1	93701935	93754864	-	904.193282418378	912.854434400532	995.332695271794	704.175625292426	712.700395127158	699.91742374567	651.136781806975	634.591797529407	586.151622147882	937.460137363568	705.597814721751	623.960067161421	912.854434400532	704.175625292426	634.591797529407	0.752669672660551	-0.409911252798273	0.665585705773253	-0.587303644628733	1.13083809662968	0.177392391830461	1
LOF down	ENSMUSG00000022757.19	Tfg	chr16	56690332	56717450	-	2289.96142474325	2168.10824834784	2373.48565795582	1631.42058393947	1753.65168908528	1760.29232072036	1813.98062768924	1619.14230693165	1816.38845700477	2277.18511034897	1715.12153124837	1749.83713054189	2289.96142474325	1753.65168908528	1813.98062768924	0.753176157464658	-0.408940764149159	0.768421118946158	-0.380030924946649	0.980160668277301	-0.0289098392025099	1
LOF down	ENSMUSG00000015290.15	Ubl4a	chrX	74365718	74373218	-	2372.26694625454	2230.0180992622	2358.45906802001	1758.02750287047	1771.53306100604	1715.96421721647	1709.40833939047	1806.9534823034	1780.03796880956	2320.24803784558	1748.50826036433	1765.46659683448	2358.45906802001	1758.02750287047	1780.03796880956	0.753586785483446	-0.40815442808509	0.760895631862602	-0.394229514641237	0.990394416693832	-0.013924913443853	1
LOF down	ENSMUSG00000034403.16	Pja1	chrX	99465734	99471273	-	2200.65117799696	2169.37171469303	2348.44134139614	1518.07724699172	1719.16618609526	1826.7844759762	1505.84095150221	1791.78860478892	1663.0348349312	2239.48807802871	1688.00930302106	1653.55479707411	2200.65117799696	1719.16618609526	1663.0348349312	0.753747840670318	-0.407846130887823	0.73836284876749	-0.437598130266743	1.02083662785649	0.0297519993789204	1
LOF down	ENSMUSG00000029198.3	Grpel1	chr5	36464998	36474080	+	2880.69325289522	2853.53874061398	3279.37436551447	2415.17770113139	2310.52870033159	2069.42251620803	2261.55002160795	2089.25350988082	2161.71809485934	3004.53545300789	2265.042972557	2170.84054211604	2880.69325289522	2310.52870033159	2161.71809485934	0.753874603240056	-0.407603524084109	0.722521193731554	-0.468888188045032	1.04339444957534	0.0612846639609233	1
LOF down	ENSMUSG00000078249.5	Hmga1-rs1	chr11	120762794	120764419	+	8328.61830441925	9459.57252644538	9333.65900584132	6394.25229610571	7319.86731984542	6743.70437778953	7073.26958052844	5664.66501618162	6203.43800106509	9040.61661223532	6819.27466458022	6313.79086592505	9333.65900584132	6743.70437778953	6203.43800106509	0.754293092724583	-0.406802880069384	0.698380557071754	-0.517914700018831	1.08006026955743	0.111111819949447	1
LOF down	ENSMUSG00000000409.14	Lck	chr4	129548344	129573641	-	71159.8362081955	73981.0083763166	78232.720517222	54897.9658286624	60834.9817561049	52849.598137996	49620.2479463525	52076.189384757	53195.5316154325	74457.8550339114	56194.1819075878	51630.656315514	73981.0083763166	54897.9658286624	52076.189384757	0.754711264271506	-0.406003287901698	0.693421215155864	-0.528196118554371	1.08838790590199	0.122192830652673	1
LOF down	ENSMUSG00000020453.17	Patz1	chr11	3288874	3309083	+	8046.09438660744	7753.89296043746	7994.86139775108	5447.71485457394	6193.34088883797	6334.25268489831	6323.13769913197	6019.28984421276	5894.45885140574	7931.61624826533	5991.76947610341	6078.96213158349	7994.86139775108	6193.34088883797	6019.28984421276	0.755428564438405	-0.404632758561611	0.766421614625264	-0.383789846348553	0.985656654278685	-0.0208429122130581	1
LOF down	ENSMUSG00000053038.8	RP23-81C3.1	chr8	42246911	42247408	+	23935.1461280072	21995.0538702584	24356.6711821399	17964.9189062189	18106.166310614	17035.9900939696	18141.2005740697	17093.1500169088	18288.8393732188	23428.9570601352	17702.3584369342	17841.0633213991	23935.1461280072	17964.9189062189	18141.2005740697	0.75557603317542	-0.404351154631897	0.761496266163551	-0.393091132108524	0.992225525913662	-0.0112600225233732	1
LOF down	ENSMUSG00000029312.12	Klhl8	chr5	103861973	103911259	-	730.82633285204	628.574506732547	680.48985852155	529.337499149615	472.579115048474	541.269474363318	469.878148755783	498.107899899002	488.459685123235	679.963566035379	514.395362853802	485.48191125934	680.48985852155	529.337499149615	488.459685123235	0.756504301918785	-0.402579808427833	0.713982241857471	-0.486039902849745	1.05955618721089	0.0834600944219119	1
LOF down	ENSMUSG00000109324.2	Prmt1	chr7	44975989	44986568	-	6571.59972463919	6666.04843722797	7981.98146352039	5489.91716088427	5801.22794743289	4775.76988802462	5684.54959192085	5027.74016057306	5454.84513479483	7073.20987512918	5355.63833211393	5389.04496242958	6666.04843722797	5489.91716088427	5454.84513479483	0.75717226360629	-0.401306531033485	0.761895243823958	-0.392335445731802	0.993801011023557	-0.00897108530168341	1
LOF down	ENSMUSG00000101209.1	RP23-128A11.4	chr9	96905507	96905885	+	1299.96025819608	1190.18529716997	1275.82904074019	876.602191074646	1060.10990673036	915.725296067252	804.50947131183	711.582714141431	840.605039514405	1255.32486536875	950.812464624086	785.565741655889	1275.82904074019	915.725296067252	804.50947131183	0.757423429468028	-0.400828045919407	0.625786808919086	-0.676256846835203	1.21035377971024	0.275428800915796	1
LOF down	ENSMUSG00000030888.14	Rrp8	chr7	105731730	105737385	-	1604.66580591874	1398.02551095389	1609.99177883647	1065.909679381	1231.260180829	1200.35838172382	1279.96480877688	1168.86209765527	1192.75039390557	1537.56103190303	1165.84274731127	1213.85910011257	1604.66580591874	1200.35838172382	1192.75039390557	0.758241606753206	-0.399270471655517	0.789470515268057	-0.341042708815631	0.960443223767201	-0.058227762839886	1
LOF down	ENSMUSG00000062081.6	RP23-460I18.1	chr14	48079375	48079752	-	2919.21924168774	2946.40351698552	2822.85225222662	2174.02166507234	2384.60866971757	2034.42664502075	1975.71910025799	2011.09606422923	2037.89924444438	2896.15833696663	2197.68565993689	2008.23813631053	2919.21924168774	2174.02166507234	2011.09606422923	0.758827869279652	-0.398155429668278	0.693414483136968	-0.528210124900312	1.09433518874131	0.130054695232034	1
LOF down	ENSMUSG00000030521.11	Mphosph10	chr7	64376527	64392268	-	2001.01650879935	1818.12807072992	2128.05135567097	1443.31887581341	1568.45176562034	1502.48940297404	1451.46336158685	1387.003028056	1517.63288215033	1982.39864506675	1504.75334813593	1452.03309059773	2001.01650879935	1502.48940297404	1451.46336158685	0.759056888926226	-0.397720079739243	0.73246271339579	-0.449172775035965	1.03630788986806	0.0514526952967225	1
LOF down	ENSMUSG00000048429.10	Timm29	chr9	21592722	21595970	+	3024.87384731571	2585.05214226088	2910.86513613635	1976.27371550391	2193.02254199522	2302.72832412325	2215.53821475649	2151.07954897836	2092.42497673721	2840.26370857098	2157.34152720746	2153.01424682402	2910.86513613635	2193.02254199522	2151.07954897836	0.759556769569429	-0.396770298539794	0.758033220762893	-0.3996670190772	1.00200987076134	0.00289672053740638	1
LOF down	ENSMUSG00000024782.7	Ak3	chr19	29020833	29047961	-	3209.33161183747	2936.295786224	3154.15278271608	2070.32456956694	2417.81693185611	2575.69611938407	2564.11250908571	2225.73740751123	2391.18055159165	3099.92672692585	2354.61254026904	2393.67682272953	3154.15278271608	2417.81693185611	2391.18055159165	0.759570385911693	-0.396744436018162	0.772172065209845	-0.373005731895088	0.983680218611991	-0.0237387041230736	1
LOF down	ENSMUSG00000054452.10	Aes	chr10	81559488	81566362	+	20630.0832712914	25170.1447957235	25790.6371931569	18842.7268774739	18917.2142513053	16621.8722849201	14998.4547363975	17136.3115913732	16462.2273414091	23863.6217533906	18127.2711378998	16198.9978897266	25170.1447957235	18842.7268774739	16462.2273414091	0.759619446085303	-0.396651256261812	0.678815565262008	-0.558908448585381	1.11903657629316	0.162257192323569	1
LOF down	ENSMUSG00000057130.11	Txnl4a	chr18	80206795	80223533	+	1967.16033683017	1988.06429415811	2079.39382635502	1420.4090523878	1619.54139967963	1544.48444839878	1420.78882368588	1550.31709359666	1352.91973251575	2011.5394857811	1528.14496682207	1441.3418832661	1988.06429415811	1544.48444839878	1420.78882368588	0.75968927163698	-0.396518647298239	0.716536709050188	-0.480887477478746	1.06022379878345	0.0843688301805069	1
LOF down	ENSMUSG00000116174.1	RP24-388K7.4	chr15	73428359	73428910	-	4399.55117468516	4620.49642436366	5172.72469742617	3866.93703820687	3425.55996367569	3489.08835737216	2847.15483608103	3337.43958222727	3198.84296117914	4730.924098825	3593.86178641824	3127.81245982915	4620.49642436366	3489.08835737216	3198.84296117914	0.75965323292987	-0.396587088566592	0.66114196602858	-0.596968002134479	1.14900168490746	0.200380913567887	1
LOF down	ENSMUSG00000028896.13	Rcc1	chr4	132331919	132353605	-	5225.52502531267	5408.26769059028	6155.89301036897	4140.64913913389	4461.40229422789	4156.3429680097	4811.71955892049	3903.20616642169	4347.29119759679	5596.56190875731	4252.79813379049	4354.07230764632	5408.26769059028	4156.3429680097	4347.29119759679	0.759894771669703	-0.396128443306264	0.777990555386017	-0.362175453532531	0.976740355533835	-0.0339529897737332	1
LOF down	ENSMUSG00000081325.1	RP23-311O20.1	chr11	11436984	11437775	+	938.633181490479	875.582177217396	864.386697259761	672.825340604749	697.37350490937	666.088081597963	559.113168104062	552.934764759079	646.357118221211	892.867351989212	678.762309037361	586.135017028117	875.582177217396	672.825340604749	559.113168104062	0.760205093763538	-0.395539402859313	0.656463712915778	-0.607212828846621	1.15803064024206	0.211673425987308	1
LOF down	ENSMUSG00000094936.7	Rbm4	chr19	4784293	4793901	-	2153.9530097636	2362.68206550726	2303.36157158872	1849.66679657291	1789.41443292679	1544.48444839878	1500.26376279294	1759.12579168078	1681.21007902881	2273.33221561986	1727.85522596616	1646.86654450084	2303.36157158872	1789.41443292679	1681.21007902881	0.760053992150475	-0.395826187593012	0.724428454928572	-0.465084879662105	1.04917744047673	0.0692586920690936	1
LOF down	ENSMUSG00000075327.10	Zbtb2	chr10	4367075	4388108	-	2188.97663593862	1926.78617641635	2067.94499592774	1451.75933707548	1548.01591199662	1701.96586874155	1648.05926358853	1616.8092488525	1605.10124437007	2061.23593609424	1567.24703927122	1623.32325227037	2067.94499592774	1548.01591199662	1616.8092488525	0.760343351203617	-0.395277045781012	0.787548491584299	-0.344559337845381	0.965455917100477	-0.0507177079356311	1
LOF down	ENSMUSG00000040842.17	Szrd1	chr4	141113001	141139775	-	6770.06693963096	6650.88684108568	7056.05730271399	5195.70679689223	5659.45421291834	4717.44343604582	5069.66453672411	5052.23727040416	5126.55478828177	6825.67036114354	5190.8681486188	5082.81886513668	6770.06693963096	5195.70679689223	5069.66453672411	0.760492065097199	-0.394994899803656	0.744662223079452	-0.425341923799255	1.02125774818049	0.0303470239955989	1
LOF down	ENSMUSG00000104496.1	RP23-13N24.1	chr1	139928240	139929608	-	2354.75513316704	2452.38817601582	2577.41794994177	1899.10378396502	1983.55504235211	1734.62868184969	1932.49588776117	1852.44811484687	1857.28275622439	2461.52041970821	1872.42916938894	1880.74225294414	2452.38817601582	1899.10378396502	1857.28275622439	0.760679925462856	-0.394638562425669	0.764057140410433	-0.388247559893128	0.995579892171726	-0.00639100253254092	1
LOF down	ENSMUSG00000029063.16	Nadk	chr4	155562378	155591001	+	4387.87663262682	3736.70171590252	3915.50000613031	2849.25856603767	3213.53798232962	3104.13377431205	3255.68390903487	3170.62592956789	3215.88225252065	4013.35945155322	3055.64344089311	3214.06403037447	3915.50000613031	3104.13377431205	3215.88225252065	0.761367995510729	-0.393334168129281	0.800841307431506	-0.320411704517617	0.950710194948139	-0.0729224636116638	1
LOF down	ENSMUSG00000030801.10	Kat8	chr7	127912516	127925837	+	1273.69253856482	1348.11859031885	1330.92653717149	876.602191074646	1067.77335183925	1067.37407121215	904.898868078644	961.21992861072	1010.99795292949	1317.57922201839	1003.91653804202	959.038916539618	1330.92653717149	1067.37407121215	961.21992861072	0.761940171236251	-0.392250375448893	0.72787950850536	-0.458228445107493	1.04679436958025	0.0659780696585996	1
LOF down	ENSMUSG00000024742.15	Fen1	chr19	10199132	10204169	-	4047.56373162623	4508.67965281426	4887.21948864583	3358.09780212227	3733.37500888294	3172.95898764704	3572.1893682858	3127.46435510357	3230.64963834996	4481.15429102877	3421.47726621742	3310.10112057978	4508.67965281426	3358.09780212227	3230.64963834996	0.763525878380751	-0.389251039399128	0.738671535413669	-0.436995110181518	1.03364735444038	0.0477440707823899	1
LOF down	ENSMUSG00000021477.9	Ctsl	chr13	64359337	64370890	-	64928.5493845569	64937.7480106117	66997.1245566485	48132.3332370258	54140.9624534858	48069.162133813	57336.288525624	49499.3267363334	50482.8764338644	65621.1406506057	50114.1526081082	52439.4972319406	64937.7480106117	48132.3332370258	50482.8764338644	0.7636891421156	-0.388942582792351	0.799125048909929	-0.323506817859013	0.955656618644771	-0.0654357649333377	1
LOF down	ENSMUSG00000040667.11	Nup88	chr11	70943058	70969973	-	4041.72646059706	3777.13263894864	4172.38313884244	2643.07015520719	3341.26206747786	3178.79163284492	3100.9169223527	3041.14120617494	3218.15415803285	3997.08074612938	3054.37461850999	3120.07076218683	4041.72646059706	3178.79163284492	3100.9169223527	0.764151342568631	-0.388069698052733	0.780587373724733	-0.357367968021381	0.978944021246879	-0.0307017300313518	1
LOF down	ENSMUSG00000029227.15	Fip1l1	chr5	74535449	74598800	+	4352.26927934889	4062.67603296182	4289.01809882037	2829.96608315295	3345.09379003231	3545.08175127182	3290.5413384678	3120.46518086611	3473.74352815547	4234.65447037703	3240.04720815236	3294.91668249646	4289.01809882037	3345.09379003231	3290.5413384678	0.765126701792953	-0.386229423013146	0.778083951251659	-0.362002271911999	0.983347234655255	-0.0242271511011465	1
LOF down	ENSMUSG00000029447.11	Cct6a	chr5	129786998	129846371	+	9671.19064112827	9462.73119230836	10342.5871872455	7077.92965833312	7904.84362982434	7570.773466849	8079.95214255122	7113.49408333516	7433.67483592198	9825.50300689405	7517.84891833549	7542.37368726945	9671.19064112827	7570.773466849	7433.67483592198	0.765136290026129	-0.386211343903178	0.767632321925642	-0.381512635959455	0.996748401769676	-0.00469870794372399	1
LOF down	ENSMUSG00000036646.13	Man1b1	chr2	25332338	25352212	+	4683.24254670281	3709.53718948092	4007.80620145026	2987.92328677163	3225.03314999296	3280.27965928804	3180.39186145976	3105.30030335162	3211.33844149625	4133.528645878	3164.41203201754	3165.67686876921	4007.80620145026	3225.03314999296	3180.39186145976	0.765547381696056	-0.38543642229296	0.765853376128423	-0.384859882607009	0.999600452982379	-0.000576539685950693	1
LOF down	ENSMUSG00000028619.15	Tceanc2	chr4	107134155	107179116	-	1752.93249005964	1631.13505164164	1667.95148287459	1216.63220191791	1264.46844296754	1387.003028056	1299.48496925932	1214.35673019874	1280.21875612532	1684.00634152529	1289.36789098048	1264.68681852779	1667.95148287459	1264.46844296754	1280.21875612532	0.765655009239833	-0.385233609490622	0.750998845635167	-0.413117404721317	1.01951556076264	0.0278837952306955	1
LOF down	ENSMUSG00000069622.4	Gm10273	chr10	59395632	59396757	+	2500.10318179336	2706.97664457182	2897.26965000395	2035.35694433838	2199.40874625263	1978.43325112109	1850.23235429948	1819.78530173874	1866.3703782732	2701.44982545638	2071.06631390403	1845.46267810381	2706.97664457182	2035.35694433838	1850.23235429948	0.7666499278972	-0.383360138512369	0.683137869418707	-0.549751325370288	1.12224773682881	0.166391186857919	1
LOF down	ENSMUSG00000056167.7	Cnot10	chr9	114585878	114640184	-	3145.70535761952	2914.18512518315	3149.14391940414	2298.21702364275	2429.31209951945	2337.72419531054	2617.09580182375	2544.19983531551	2550.21393744573	3069.67813406894	2355.08443949091	2570.50319152833	3145.70535761952	2337.72419531054	2550.21393744573	0.767208917883905	-0.382308604833574	0.837385249938587	-0.256036588831919	0.916195882289749	-0.126272016001655	1
LOF down	ENSMUSG00000030435.16	U2af2	chr7	5062143	5079938	+	11605.0785330922	11900.5895053545	12495.6828594762	8963.76986031489	9761.95182787969	8902.94963004492	10094.7115637741	9818.67492611217	10087.2604741729	12000.4502993076	9209.55710607983	10000.2156546864	11900.5895053545	8963.76986031489	10087.2604741729	0.767434294245707	-0.381884858963169	0.833320034270993	-0.263057429807056	0.920935850194787	-0.118827429156112	1
LOF down	ENSMUSG00000001416.13	Cct3	chr3	88297116	88321767	+	11264.7656320916	11220.8446116417	12442.0164668483	8792.54907471296	9535.88019716731	8479.49958867879	8231.93053487876	8129.54087680596	8120.92625336281	11642.5422368605	8935.97628685302	8160.79922168251	11264.7656320916	8792.54907471296	8129.54087680596	0.767527925177847	-0.381708853482472	0.700946499111272	-0.512623762509423	1.09498788588144	0.130914909026951	1
LOF down	ENSMUSG00000046032.16	Snx12	chrX	101097786	101222563	-	1621.01016480041	1580.596397834	1454.71701616647	1202.16283975436	1184.00226932415	1188.69309132806	1126.59211927203	1068.54060025172	1138.22466161275	1552.10785960029	1191.61940013552	1111.1191270455	1580.596397834	1188.69309132806	1126.59211927203	0.767742649304279	-0.381305300598008	0.71587752112256	-0.482215315755279	1.07244972310402	0.100910015157271	1
LOF down	ENSMUSG00000026786.14	Apbb1ip	chr2	22774094	22875653	+	4578.75539528067	3993.18538397631	3946.98428980533	2813.08516062882	3331.044140666	3468.09083465979	3106.49411106197	3337.43958222727	3330.6134808868	4172.97502302077	3204.07337865154	3258.18239139201	3993.18538397631	3331.044140666	3330.6134808868	0.767815134520538	-0.381169097241529	0.780781666177683	-0.35700891804327	0.983392884056021	-0.0241601791982595	1
LOF down	ENSMUSG00000083482.1	RP23-289P8.1	chrX	76919856	76920110	-	1339.65370119443	1596.38972714889	1603.55181172113	1211.80908119673	1180.1705467697	1094.2042391224	839.366900744751	864.398018325902	941.704834807353	1513.19841335482	1162.06128902961	881.823251292669	1596.38972714889	1180.1705467697	864.398018325902	0.767950375029324	-0.380915007915203	0.582754543958075	-0.779039746249269	1.31779388593592	0.398124738334066	1
LOF down	ENSMUSG00000034116.17	Vav1	chr17	57279100	57328031	+	9531.0961364282	8891.644404282	10059.944186072	6941.67649795975	7714.53474295346	7220.81475497616	7215.48789261476	8105.04376697486	7765.37304070334	9494.22824226073	7292.34199862979	7695.30156676432	9531.0961364282	7220.81475497616	7765.37304070334	0.768081597845952	-0.380668509781566	0.810524180629129	-0.303072868116349	0.947635636545435	-0.0775956416652169	1
LOF down	ENSMUSG00000089803.3	AC074310.4	chr1	172144274	172144901	-	1940.30889009599	2003.22589030041	2113.02476573516	1454.17089743607	1670.63103373893	1528.15304184471	1316.21653538712	1376.50426669982	1440.38809473549	2018.85318204385	1550.98499100657	1377.70296560748	2003.22589030041	1528.15304184471	1376.50426669982	0.768250512123115	-0.380351271354537	0.682418601739386	-0.551271121924891	1.1257760415161	0.170919850570354	1
LOF down	ENSMUSG00000028334.10	Nans	chr4	46489248	46503632	+	3575.32850536641	3755.65371108039	4112.99233100091	2989.12906695192	3084.5366563299	2720.3457202915	2796.96013769763	3025.97632866045	2717.19899259251	3814.65818248257	2931.33714785777	2846.7118196502	3755.65371108039	2989.12906695192	2796.96013769763	0.76844031827514	-0.379994879046816	0.746256068950735	-0.422257335699835	1.0297273955247	0.042262456653019	1
LOF down	ENSMUSG00000021178.9	Psmc1	chr12	100110154	100123405	+	5170.07095053556	6088.01258430307	6166.62628889455	4724.24674639679	4604.45326959391	4071.18634812065	4396.21900008007	4381.48307264789	4480.19767006056	5808.23660791106	4466.62878803712	4419.29991426284	6088.01258430307	4604.45326959391	4396.21900008007	0.769016327942526	-0.378913864721545	0.760867749127776	-0.39428238262816	1.01070958629025	0.015368517906615	1
LOF down	ENSMUSG00000021901.10	Bap1	chr14	31251450	31259944	+	5311.91663654438	5010.9075250277	5208.50229251142	3693.30469224435	4309.41063290149	3947.53426992558	3952.83249769331	3804.05119805772	3747.5081423757	5177.10881802783	3983.41653169047	3834.79727937558	5208.50229251142	3947.53426992558	3804.05119805772	0.769428781913824	-0.378140297553719	0.740721783946663	-0.432996328726839	1.03875543907215	0.0548560311731193	1
LOF down	ENSMUSG00000053644.13	Aldh7a1	chr18	56509687	56572951	-	2184.8905462182	2035.44428210278	2279.74835883245	1503.60788482818	1849.44475294646	1652.97164907936	1671.76231560292	1505.98899009277	1675.53031524831	2166.69439571781	1668.67476228467	1617.76054031467	2184.8905462182	1652.97164907936	1671.76231560292	0.770147726224144	-0.376792891353267	0.746649155280948	-0.421497603999336	1.03147203847616	0.0447047126460683	1
LOF down	ENSMUSG00000028902.4	Sf3a3	chr4	124714776	124732460	+	4423.48398590476	4719.04679928857	5277.91082697682	3677.62954990051	3924.9611366053	3515.91852528242	3991.87281865818	3585.91026765698	3544.17259903371	4806.81387072338	3706.16973726274	3707.31856178296	4719.04679928857	3677.62954990051	3585.91026765698	0.771024182949068	-0.375151984327399	0.771263182117979	-0.374704852455175	0.999690119826212	-0.000447131872223576	1
LOF down	ENSMUSG00000110546.1	RP23-314A15.8	chr8	72035245	72035655	+	798.538676790408	966.551754071152	893.72432522967	682.471582047111	680.769373840099	687.085604310333	593.970597536984	549.435177640351	598.647102464988	886.271585363743	683.442186732514	580.684292547441	893.72432522967	682.471582047111	593.970597536984	0.771143064969206	-0.374929556440313	0.655199040719687	-0.609994850164184	1.17696000305825	0.235065293723871	1
LOF down	ENSMUSG00000050017.11	Pitpnb	chr5	111330763	111388359	+	4271.13121204343	3656.47160298289	3937.68211508316	2784.14643630173	3182.88420189405	3196.28956843856	3181.78615863708	2913.98954086114	3229.51368559385	3955.09497670316	3054.44006887811	3108.42979503069	3937.68211508316	3182.88420189405	3181.78615863708	0.772279828138083	-0.372804406048576	0.785930505674424	-0.34752634417365	0.982631190114415	-0.0252780618749263	1
LOF down	ENSMUSG00000042079.13	Hnrnpf	chr6	117900324	117925622	+	31249.8304546597	28940.9601029461	30594.8526612049	20284.839973107	24484.7071229169	25375.5061978993	22199.9996572391	20918.1987376789	22683.8405865718	30261.8810729369	23381.6844313077	21934.0129938299	30594.8526612049	24484.7071229169	22199.9996572391	0.772644779581065	-0.372122801724174	0.724806661587387	-0.464331879852382	1.06600121181131	0.092209078128209	1
LOF down	ENSMUSG00000020484.18	Xbp1	chr11	5520659	5525893	+	6855.87482375975	6514.43247580504	7255.69628328971	5351.25244015032	5295.44057024587	5290.20919447769	5051.53867341899	5035.9058638501	4646.04677245124	6875.33452761817	5312.30073495796	4911.16376990678	6855.87482375975	5295.44057024587	5035.9058638501	0.772660692162467	-0.372093089796407	0.714316336198431	-0.485364979181699	1.08167859673285	0.113271889385292	1
LOF down	ENSMUSG00000028990.13	Lzic	chr4	149485229	149496668	+	2421.30002289957	2252.12876030304	2547.36477007016	1836.40321458967	1938.85161255023	1805.78695326383	1826.52930228509	1498.98981585531	1789.12559085836	2406.93118442426	1860.34726013458	1704.88156966625	2421.30002289957	1836.40321458967	1789.12559085836	0.772912525365604	-0.371622948993769	0.708321692244004	-0.49752336960708	1.09118855716105	0.125900420613311	1
LOF down	ENSMUSG00000071497.3	Nutf2-ps1	chr19	53588204	53589067	-	2646.61868462552	2752.4614329987	2779.20358622261	1947.33499117683	2290.09284670787	2085.7539227621	2113.75452081236	1808.12001134298	1924.30396883433	2726.09456794894	2107.72725354893	1948.72616699656	2752.4614329987	2085.7539227621	1924.30396883433	0.77316732821002	-0.371147420123094	0.71484173363169	-0.484304231148842	1.08159231873888	0.113156811025748	1
LOF down	ENSMUSG00000030745.9	Il21r	chr7	125603429	125633570	+	10978.1556245594	11231.5840755758	12191.5733012515	8546.56991793273	9214.01550259376	8845.78970710569	9359.9169513281	8754.80044201876	9086.48609604827	11467.1043337956	8868.79170921073	9067.06782979838	11231.5840755758	8845.78970710569	9086.48609604827	0.773411617357736	-0.370691659690181	0.790702479533228	-0.338793146138792	0.978132277787089	-0.0318985135513893	1
LOF down	ENSMUSG00000048878.6	Hexim1	chr11	103116231	103119725	+	3763.87235960859	3914.21873740187	3911.20669472008	2928.84005793716	3236.5283176563	2803.16928210141	2974.03587921687	3209.1213878739	3172.71604778883	3863.09926391018	2989.51255256496	3118.6244382932	3911.20669472008	2928.84005793716	3172.71604778883	0.773863768009681	-0.36984848008811	0.807285608068111	-0.308848922689725	0.958599732579885	-0.0609995573983848	1
LOF down	ENSMUSG00000025747.12	Tyms	chr5	30058202	30073617	-	4404.80471861142	4674.19374403428	4860.74406828274	3540.17060934685	3765.30603017	3483.25571217428	3607.04679771872	2880.16019871343	3366.96396908202	4646.58084364281	3596.24411723038	3284.72365517139	4674.19374403428	3540.17060934685	3366.96396908202	0.773954922607352	-0.369678552838926	0.706911978011824	-0.500397507563564	1.09483916906329	0.130718954724638	1
LOF down	ENSMUSG00000021774.13	Ube2e1	chr14	18282722	18331859	-	5697.76025157249	5642.00896445063	6378.42965179926	4383.01095537323	4543.14570872276	4786.26864938081	4166.15996582279	3892.7074050655	4536.99530786558	5906.06628927413	4570.8084378256	4198.62089291796	5697.76025157249	4543.14570872276	4166.15996582279	0.773917564407725	-0.369748192282486	0.710899723652438	-0.492282020826064	1.08864518955151	0.122533828543577	1
LOF down	ENSMUSG00000023883.13	Phf10	chr17	14945009	14961273	-	3171.38935014787	3249.63543983138	3522.66201209421	2359.7118128378	2724.35473621188	2621.19075192753	2313.13901716868	2333.05807915223	2418.44341773806	3314.56226735782	2568.41910032574	2354.88017135299	3249.63543983138	2621.19075192753	2333.05807915223	0.774889380000435	-0.36793772297213	0.710464906495833	-0.493164705763891	1.09067931845129	0.12522698279176	1
LOF down	ENSMUSG00000101841.1	RP23-104F14.2	chr11	9149778	9150597	-	1548.62800403871	1559.74920313835	1807.48410370708	1301.03681453857	1318.1125587298	1189.85962036764	1239.53019063469	1229.52160771323	1180.25491358847	1638.62043696138	1269.66966454534	1216.43557064546	1559.74920313835	1301.03681453857	1229.52160771323	0.774840613424658	-0.368028519817202	0.742353471985979	-0.429821804463155	1.04376236208846	0.0617932846459528	1
LOF down	ENSMUSG00000028792.14	Ak2	chr4	128991958	129011529	+	4997.28772807213	5221.9064046746	5589.17590421853	4169.58786346097	4139.53759965433	3946.367740886	4159.1884799362	4233.33388462173	4233.69592198674	5269.45667898842	4085.16440133377	4208.73942884822	5221.9064046746	4139.53759965433	4233.33388462173	0.775253436966863	-0.367260078068738	0.798704626537736	-0.32426602429354	0.970638470353515	-0.042994053775198	1
LOF down	ENSMUSG00000107035.1	Ybx1-ps2	chr6	37686239	37687195	-	5786.48677121587	5707.07748122797	6087.20002780528	4234.69999319692	4817.75249179147	4580.95953841541	4418.52775491714	3899.70657930296	4310.94070940158	5860.25476008304	4544.47067446793	4209.72501454056	5786.48677121587	4580.95953841541	4310.94070940158	0.775473227789083	-0.366851119947905	0.718351878354331	-0.477237386212623	1.07951722708043	0.110386266264718	1
LOF down	ENSMUSG00000027680.15	Fxr1	chr3	34019943	34070322	+	6414.57713395452	5481.54873861136	5878.25887250739	4173.20520400186	4798.59387901923	4816.59840440979	4358.57297629251	4001.19460574608	4586.97722913401	5924.79491502442	4596.13249581029	4315.5816037242	5878.25887250739	4798.59387901923	4358.57297629251	0.775745415956114	-0.36634482829859	0.728393415404221	-0.457210214317002	1.06500882565724	0.0908653860184123	1
LOF down	ENSMUSG00000022774.13	Ncbp2	chr16	31948513	31961781	+	3411.88491654966	3384.19460559422	3587.77723514937	2474.26092996585	2968.30773884501	2616.52463576923	2675.65628327106	2727.34489452896	2846.69760678797	3461.28558576442	2686.36443486003	2749.89959486266	3411.88491654966	2616.52463576923	2727.34489452896	0.776117534452666	-0.365652945655544	0.794473477187915	-0.331929037639773	0.976895461884743	-0.0337239080157706	1
LOF down	ENSMUSG00000083692.1	RP24-240E9.1	chr16	50665008	50666346	-	3083.24655760741	3251.53063934916	3294.40095545028	2561.07710294711	2567.25411147955	2349.3894857063	2359.15082402013	2329.5584920335	2528.63083507982	3209.72605080228	2492.57356671099	2405.78005037782	3251.53063934916	2561.07710294711	2359.15082402013	0.776568943037353	-0.364814083522933	0.749528156702496	-0.415945419553378	1.03607707875021	0.0511313360304451	1
LOF down	ENSMUSG00000032312.7	Csk	chr9	57626646	57653631	-	10736.4926039517	10556.2613140712	12031.2896752695	8799.78375579473	8779.75361308976	8298.68758754449	8118.99246351609	9339.23149084639	8721.84526134	11108.0145310975	8626.07498547633	8726.68973856749	10736.4926039517	8779.75361308976	8721.84526134	0.77656317079233	-0.364824807130018	0.785621022923284	-0.348094558741175	0.988470456025668	-0.0167302483888432	1
LOF down	ENSMUSG00000007656.13	Arpp19	chr9	75037614	75060313	+	4145.62988491628	4884.56089050859	4853.58854926569	3837.99831387978	3488.14476539833	3457.59207330361	3538.7262360302	3339.77264030642	3553.26022108251	4627.92644156352	3594.57838419391	3477.25303247304	4853.58854926569	3488.14476539833	3538.7262360302	0.77671467547775	-0.364543369962103	0.751363072939913	-0.412417880951297	1.03374081512769	0.0478745109891939	1
LOF down	ENSMUSG00000037935.16	Smarce1	chr11	99209047	99231017	-	5744.45841980585	5861.22037534127	6318.32329205603	4426.41904186386	4767.94009858366	4731.44178452073	4333.47562710081	4400.14753728111	4560.8503157437	5974.66736240105	4641.93364165608	4431.49116004187	5861.22037534127	4731.44178452073	4400.14753728111	0.776935912929322	-0.36413249485443	0.741713453024937	-0.431066158370453	1.04748796150419	0.0669336635160233	1
LOF down	ENSMUSG00000061887.14	Ssbp3	chr4	106910701	107049694	+	5338.18435617564	5333.09144305141	5745.88177069195	3812.67693009358	4738.56355899956	4205.3371876719	4263.76076823497	4290.49380756096	4256.41497710875	5472.38585663967	4252.19255892168	4270.22318430156	5338.18435617564	4205.3371876719	4263.76076823497	0.777027181619965	-0.363963027654091	0.780322019712934	-0.35785848325846	0.995777591802188	-0.0061045443956312	1
LOF down	ENSMUSG00000025613.13	Cct8	chr16	87483326	87495873	-	11982.1662415765	13001.7004251885	14021.9550658131	9956.12694869788	10648.3569788084	9714.8538415899	10704.0194302616	9131.58932180184	10106.5716710266	13001.940577526	10106.4459230321	9980.72680769668	13001.7004251885	9956.12694869788	10106.5716710266	0.777302885117098	-0.363451223783403	0.767633627317791	-0.381510182595879	1.01259618840969	0.0180589588124756	1
LOF down	ENSMUSG00000060073.9	Psma3	chr12	70974621	70996347	+	2182.55563780653	2062.60880852439	2120.18028475221	1601.27607943209	1620.81864053112	1726.46297857265	1684.31099019877	1565.48197111115	1741.41557510214	2121.78157702771	1649.51923284529	1663.73617880402	2120.18028475221	1620.81864053112	1684.31099019877	0.777421790586008	-0.363230548916212	0.784122266314829	-0.350849467009779	0.991454807474973	-0.0123810819064327	1
LOF down	ENSMUSG00000028467.15	Gba2	chr4	43566928	43578873	-	3416.55473337299	2900.91872855865	3217.12135006613	2372.97539482105	2531.49136763804	2510.3704931678	2472.0888953828	2603.69281633389	2654.72159100698	3178.19827066592	2471.6124185423	2576.83443424122	3217.12135006613	2510.3704931678	2603.69281633389	0.777677227174509	-0.362756602114628	0.81078466942256	-0.302609284766746	0.959166171368743	-0.0601473173478819	1
LOF down	ENSMUSG00000029518.15	Rab35	chr5	115631908	115647736	+	4391.37899524432	4063.30776613441	4536.59905681033	3201.34637868389	3586.49231096247	3315.27553047532	3361.65049451096	3407.43132460184	3494.19067776528	4330.42860606302	3367.70474004056	3421.09083229269	4391.37899524432	3315.27553047532	3407.43132460184	0.777683930714259	-0.362744166207374	0.790012061970687	-0.340053414240094	0.984395008823441	-0.0226907519672797	1
LOF down	ENSMUSG00000062352.14	Itgb1bp1	chr12	21240825	21286284	-	1805.46792932217	2010.17495519896	2213.20203197387	1670.00554970892	1540.35246688773	1481.49188026167	1441.70328134564	1410.33360884753	1410.85332307688	2009.614972165	1563.94996561944	1420.96340442335	2010.17495519896	1540.35246688773	1410.85332307688	0.778233635438417	-0.361724759614449	0.707082413350313	-0.500049718038622	1.10062649097857	0.138324958424173	1
LOF down	ENSMUSG00000001674.11	Ddx18	chr1	121553835	121567989	-	1688.72250873878	1631.76678481424	1822.51069364289	1249.18826678588	1381.97460130392	1373.00467958109	1395.69147449418	1401.00137653092	1393.81403173537	1714.3333290653	1334.7225158903	1396.83562758682	1688.72250873878	1373.00467958109	1395.69147449418	0.778566509360242	-0.361107807508962	0.814798151505584	-0.295485387554538	0.95553298436135	-0.065622419954424	1
LOF down	ENSMUSG00000066979.6	Bub3	chr7	131560222	131571895	+	8967.79948211333	9898.62708139927	11123.2543120058	7703.72957190635	8110.479406913	7538.11065374087	8339.29141753215	7529.94495046383	7985.74787538684	9996.56029183947	7784.10654418674	7951.66141446094	9898.62708139927	7703.72957190635	7985.74787538684	0.778678497096764	-0.360900307530824	0.795439749505853	-0.330175436965891	0.978928319310794	-0.030724870564933	1
LOF down	ENSMUSG00000024182.16	Axin1	chr17	26138688	26195811	+	4705.42417661365	3844.72808841636	4181.6853135646	3118.14754624352	3470.26339347758	3329.27387895024	3385.35354652534	3345.6052855043	3341.97300844781	4243.94585953154	3305.89493955711	3357.64394682582	4181.6853135646	3329.27387895024	3345.6052855043	0.77896727455473	-0.360365374853723	0.791160881396457	-0.337957000451797	0.984587702541354	-0.0224083744019251	1
LOF down	ENSMUSG00000023110.12	Prmt5	chr14	54507187	54517525	-	3193.57098005871	2888.91579827933	3179.19709927576	2221.04709210385	2608.12581872698	2387.88494401231	2571.08399497229	2300.3952660441	2357.10196890863	3087.2279592046	2405.68595161438	2409.52707664167	3179.19709927576	2387.88494401231	2357.10196890863	0.779238197957428	-0.359863695376444	0.780482396661913	-0.357562001486174	0.998405859363636	-0.00230169389027003	1
LOF down	ENSMUSG00000038876.12	Rnf146	chr10	29344176	29362442	-	3117.10272957659	3079.69921640318	3293.68540354857	2394.67943806637	2530.21412678656	2476.5411510201	2548.77524013522	2596.69364209644	2739.91804771452	3163.49578317611	2467.14490529101	2628.46230998206	3117.10272957659	2476.5411510201	2596.69364209644	0.779879308963082	-0.358677219416112	0.830872708590468	-0.267300624813259	0.938626700455845	-0.0913765946028531	1
LOF down	ENSMUSG00000027406.12	Idh3b	chr2	130279309	130284547	-	4305.57111111553	4284.41437654284	4291.16475452548	3079.56258047407	3582.66058840802	3395.76603420608	3390.93073523461	3409.76438268099	3671.39930771697	4293.71674739462	3352.66306769606	3490.69814187752	4291.16475452548	3395.76603420608	3409.76438268099	0.780830051197583	-0.356919517038516	0.812978206817123	-0.298711415819865	0.960456313158255	-0.0582081012186513	1
LOF down	ENSMUSG00000028820.13	Sfpq	chr4	127021324	127037013	+	26165.5673882529	25719.7526558816	27313.3316399854	18999.4783009123	19537.9533051257	23325.914675364	20471.0711573662	18005.3757258574	18919.2931528546	26399.5505613733	20621.115427134	19131.9133453594	26165.5673882529	19537.9533051257	18919.2931528546	0.78111615495856	-0.356390996299286	0.724706024857575	-0.464532206641686	1.07783863824241	0.1081412103424	1
LOF down	ENSMUSG00000031984.8	RP23-9L16.5	chr8	124836945	124863120	-	1388.68677783946	1515.52788105666	1442.55263383748	1094.84840370809	1241.47810764086	1061.54142601427	1010.86545355473	971.718689966905	971.239606465968	1448.9224309112	1132.62264578774	984.607916662534	1442.55263383748	1094.84840370809	971.718689966905	0.781699987262572	-0.355313080623683	0.679544947097915	-0.557359116653048	1.15032859945604	0.202046036029364	1
LOF down	ENSMUSG00000052310.9	Slc39a1	chr3	90248172	90253612	+	2941.40087159858	3048.1125577734	3151.29057510926	2514.0516759156	2410.15348674722	2221.07129135293	2297.80174821819	2573.36306130491	2535.44655161642	3046.93466816041	2381.75881800525	2468.87045371317	3048.1125577734	2410.15348674722	2535.44655161642	0.781690150069163	-0.355331236130499	0.810280075746998	-0.303507428803348	0.964715995698799	-0.0518238073271517	1
LOF down	ENSMUSG00000028437.14	Ubap1	chr4	41348996	41390525	+	2257.2727069799	2163.05438296707	2427.1520505837	1801.4355893611	1816.23649080792	1734.62868184969	1827.92359946241	1808.12001134298	1868.6422837854	2282.49304684356	1784.10025400624	1834.89529819693	2257.2727069799	1801.4355893611	1827.92359946241	0.781645427780582	-0.355413778388073	0.803899622272407	-0.314912722202634	0.972317197476822	-0.0405010561854389	1
LOF down	ENSMUSG00000024668.7	Sdhaf2	chr19	10500513	10525209	-	2540.96407899755	2506.71722885904	2588.15122846735	2025.71070289602	2055.08053003512	1889.77704411331	1670.3680184256	1846.61546964899	1858.41870898049	2545.27751210798	1990.18942568148	1791.80073235169	2540.96407899755	2025.71070289602	1846.61546964899	0.781914512745301	-0.354917209579998	0.70397067660718	-0.506412759198764	1.11072028811452	0.151495549618766	1
LOF down	ENSMUSG00000025510.14	Cd151	chr7	141467392	141471473	+	1773.36293866174	1669.03904199737	1760.25767819455	1424.02639292869	1332.1622080961	1312.34516952313	1385.93139425296	1399.83484749134	1498.32168529662	1734.21988628455	1356.17792351597	1428.02930901364	1760.25767819455	1332.1622080961	1399.83484749134	0.782010363415617	-0.35474036823805	0.823441894714455	-0.280261243557297	0.949684936405615	-0.0744791246807531	1
LOF down	ENSMUSG00000021877.12	Arf4	chr14	26638074	26665084	+	4683.82627380572	4674.82547720688	5149.1114846699	3475.05847961091	3962.00112129829	3912.5383987383	3878.93474729551	3934.70245049024	3892.91009515657	4835.92107856083	3783.19933321583	3902.18243098077	4683.82627380572	3912.5383987383	3892.91009515657	0.78231205012587	-0.35418390759744	0.806916069883849	-0.309509473254686	0.969508576323779	-0.0446744343427535	1
LOF down	ENSMUSG00000021811.7	Dnajc9	chr14	20384638	20388910	-	5845.44320861048	6240.26027889859	6578.78418427669	4696.51380225	5077.03238464239	4829.43022384512	4864.70285165853	3952.20038608388	4597.20080393891	6221.49589059525	4867.65880357917	4471.36801389377	6240.26027889859	4829.43022384512	4597.20080393891	0.78239363798944	-0.354033455781268	0.718696611317052	-0.476545211176271	1.08862853347209	0.122511755395003	1
LOF down	ENSMUSG00000017428.16	Psmd11	chr11	80428615	80473248	+	2997.43867347861	3006.4181683821	3140.55729658368	2280.13032093832	2474.01552932133	2404.21635056638	2331.26488047379	2482.37379621798	2484.3286775919	3048.13804614813	2386.12073360868	2432.65578476122	3006.4181683821	2404.21635056638	2482.37379621798	0.782812555561245	-0.353261199294799	0.798079269354392	-0.325396045401145	0.98087067991943	-0.0278651538936544	1
LOF down	ENSMUSG00000020780.15	Srp68	chr11	116245166	116274217	-	4581.67403079526	4075.31069641373	4379.89319033692	3122.9706669647	3721.8798412196	3379.43462765201	3644.69282150628	3203.28874267602	3456.70423681396	4345.6259725153	3408.09504527877	3434.89526699875	4379.89319033692	3379.43462765201	3456.70423681396	0.784258715967247	-0.350598437139365	0.790425887714076	-0.339297896617218	0.992197659713974	-0.0113005405221466	1
LOF down	ENSMUSG00000001924.15	Uba1	chrX	20658326	20683179	+	11220.9860993728	9716.05619451916	9884.63397015425	7754.37233947875	8074.71666307149	8361.6801556816	8298.85679938997	8322.01816833602	8351.52466285122	10273.8920880154	8063.58971941061	8324.1332101924	9884.63397015425	8074.71666307149	8322.01816833602	0.784862216804562	-0.349488684933638	0.810221981979214	-0.303610867845988	0.968700225692836	-0.0458778170876502	1
LOF down	ENSMUSG00000059923.13	Grb2	chr11	115644045	115708597	-	5897.97864787301	6338.81065382349	6562.32649053747	4774.88951396919	5054.04204931571	4926.25213412994	4740.61040287733	5395.19680803954	4864.14970162254	6266.37193074466	4918.39456580495	4999.98563751314	6338.81065382349	4926.25213412994	4864.14970162254	0.784887111739069	-0.349442925017827	0.797907575990142	-0.325706450423385	0.983681738784199	-0.0237364745944418	1
LOF down	ENSMUSG00000068165.3	RP23-48P22.4	chr14	66045080	66045707	+	1782.11884520549	1842.76566446114	1957.75000306515	1390.26454788042	1546.73867114514	1445.32948003481	1246.50167652128	1263.35094986093	1359.73544905235	1860.87817091059	1460.77756635346	1289.86269181152	1842.76566446114	1445.32948003481	1263.35094986093	0.784993660083963	-0.349247092605852	0.693147306457115	-0.528766110906459	1.13250625483391	0.179519018300606	1
LOF down	ENSMUSG00000021484.8	Lman2	chr13	55343833	55362783	-	7882.65079779069	7524.57381878529	7833.86221986743	5914.3517843482	6559.90901321341	5773.1522168622	6140.48476890346	5986.62703110463	5786.54333957619	7747.02894548114	6082.47100480794	5971.21837986143	7833.86221986743	5914.3517843482	5986.62703110463	0.785135959554644	-0.348985592232039	0.770775276803949	-0.375617798038849	1.01863147817901	0.0266322058068106	1
LOF down	ENSMUSG00000022010.19	Tsc22d1	chr14	76414961	76507765	+	8497.31543716225	8141.14539523852	8666.04908155046	6223.03151050378	6918.81369247995	6736.70520355207	6900.37673054115	6399.57831111458	7351.88623748274	8434.83663798374	6626.18346884527	6883.94709304616	8497.31543716225	6736.70520355207	6900.37673054115	0.785573420474588	-0.348181977350599	0.816132829656282	-0.293124117824205	0.962555838864411	-0.055057859526394	1
LOF down	ENSMUSG00000030718.9	Ppme1	chr7	100326737	100372307	-	2450.48637804542	2142.83892144402	2175.99333308521	1743.55814070693	1733.21583546156	1843.11588253026	1783.30608978827	1692.63363642495	1773.22225227295	2256.43954419155	1773.29661956625	1749.72065949539	2175.99333308521	1743.55814070693	1773.22225227295	0.785882619426259	-0.3476142493472	0.775434318193661	-0.366923509408534	1.01347412796604	0.0193092600613339	1
LOF down	ENSMUSG00000042660.7	Wdr55	chr18	36760239	36763708	+	1294.70671426983	1200.92476110409	1336.65095238513	1045.41141631598	1005.18855011662	963.552986689872	1033.1742083918	1031.21167098529	1015.54176395389	1277.42747591968	1004.71765104082	1026.64254777699	1294.70671426983	1005.18855011662	1031.21167098529	0.786516393282897	-0.346451258983889	0.803679713431764	-0.315307429186949	0.978644079398771	-0.0311438297969405	1
LOF down	ENSMUSG00000026083.12	Eif5b	chr1	37998010	38055579	+	5126.8751449197	4836.54916939133	5295.08407261774	3899.49310307484	4020.75420046647	4081.68510947683	4339.05281581008	4164.50867128674	4139.41184323039	5086.16946230959	4000.64413767271	4214.3244434424	5126.8751449197	4020.75420046647	4164.50867128674	0.786573111123995	-0.346347226062827	0.828585141464931	-0.271278145348737	0.949296664593021	-0.0750690807140903	1
LOF down	ENSMUSG00000061374.14	Fiz1	chr7	5007059	5014697	-	2193.64645276195	2178.84771228196	2209.62427246535	1647.09572628331	1823.89993591681	1710.13157201859	1837.68367970362	1837.28323733238	1816.38845700477	2194.03947916975	1727.04241140624	1830.45179134692	2193.64645276195	1710.13157201859	1837.28323733238	0.787151930401803	-0.345285973661951	0.834283889932366	-0.261389707732936	0.943506089354807	-0.0838962659290154	1
LOF down	ENSMUSG00000027361.15	Gabpb1	chr2	126627442	126676337	-	3094.92109966575	2898.39179586826	3091.89976726774	2194.51992813735	2512.33275486581	2448.54445407027	2384.24817321183	2453.21057022857	2467.28938625039	3028.40422093392	2385.13237902448	2434.91604323026	3091.89976726774	2448.54445407027	2453.21057022857	0.787587192798502	-0.344488443572118	0.804026102723952	-0.3146857555987	0.979554258413057	-0.0298026879734184	1
LOF down	ENSMUSG00000027671.14	Actl6a	chr3	32706298	32726973	+	4171.89760454755	4073.41549689594	4422.82630443922	3143.46893002972	3553.28404882393	3283.77924640677	3570.79507110849	3084.30278063925	3301.07870922819	4222.71313529424	3326.84407508681	3318.72552032531	4171.89760454755	3283.77924640677	3301.07870922819	0.787845152747984	-0.34401599225519	0.785922560684213	-0.347540928485915	1.00244628689892	0.00352493623072438	1
LOF down	ENSMUSG00000018965.11	Ywhah	chr5	33018816	33027966	+	9838.13659256252	10930.2473522478	11555.4476606357	8382.58381341258	8360.81861380354	8724.47068698978	9292.99068681689	8138.87310912257	8553.72425343712	10774.6105351487	8489.29103806863	8661.86268312553	10930.2473522478	8382.58381341258	8553.72425343712	0.787897716615842	-0.343919740978423	0.80391422547191	-0.314886515234042	0.980076843587802	-0.0290332257443816	1
LOF down	ENSMUSG00000033047.5	Eif3l	chr15	79075179	79094405	+	5913.73927965177	5861.22037534127	6134.42645331782	4680.83865990616	4793.4849156133	4649.7847517504	4804.74807303391	4561.12854474262	4585.84127637791	5969.79536943695	4708.03610908995	4650.57263138481	5913.73927965177	4680.83865990616	4585.84127637791	0.788642795562689	-0.342556094724601	0.779017092477566	-0.360273111963583	1.01235621551577	0.017717017238983	1
LOF down	ENSMUSG00000040028.10	Elavl1	chr8	4285382	4325413	-	5593.85682725327	5900.3878320422	6216.71492201391	4299.81212293286	4784.54422965293	4887.75667582393	4753.15907747318	4387.31571784577	4653.99844174394	5903.65319376979	4657.37100946991	4598.15774568763	5900.3878320422	4784.54422965293	4653.99844174394	0.78889644371131	-0.342092160870926	0.778866507697324	-0.360552013309411	1.01287760600162	0.0184598524384855	1
LOF down	ENSMUSG00000028907.7	Utp11	chr4	124678160	124693600	-	1747.67894613339	1912.25631344665	1952.74113975322	1442.11309563312	1549.2931528481	1438.33030579735	1482.13789948783	1408.00055076837	1523.31264593083	1870.89213311109	1476.57885142619	1471.15036539568	1912.25631344665	1442.11309563312	1482.13789948783	0.789237832205111	-0.341467981417729	0.786336282760095	-0.346781670805863	1.00368996001918	0.00531368938813457	1
LOF down	ENSMUSG00000071041.4	AC122514.1	chr8	100030558	100032102	+	6376.63487226492	6388.71757445854	7214.19427299082	5387.42584555918	5451.26395412672	4934.41783740697	5644.11497377866	5093.06578678933	5336.70604816037	6659.84890657143	5257.70254569762	5357.96226957612	6388.71757445854	5387.42584555918	5336.70604816037	0.789462736986379	-0.341056923081354	0.804517091114379	-0.313805025083393	0.98128771371762	-0.0272518979979609	1
LOF down	ENSMUSG00000021518.4	Ptdss1	chr13	66932830	66998401	+	2417.79766028207	2088.5098686008	2368.47679464388	1760.43906323106	1840.50406698608	1826.7844759762	1819.55781639851	1795.28819190764	1688.02579556541	2291.59477450892	1809.24253539778	1767.62393462385	2368.47679464388	1826.7844759762	1795.28819190764	0.78951241970147	-0.340966133804018	0.771351005983443	-0.374540581886046	1.02354494073016	0.0335744480820282	1
LOF down	ENSMUSG00000101795.2	RP23-278M14.1	chr1	143093347	143094616	-	33564.3084177255	31970.1206655417	35441.2856914536	27064.9419269072	27523.2631085934	25148.0330351819	29278.8464264768	24558.935870196	27233.3313747545	33658.5715915736	26578.7460235608	27023.7045571424	33564.3084177255	27064.9419269072	27233.3313747545	0.789657575077096	-0.340700912273904	0.802877343847467	-0.316748491875917	0.983534510131995	-0.0239524203979866	1
LOF down	ENSMUSG00000003099.11	Ppp5c	chr7	17004640	17027924	-	4039.97527928831	4095.52615793678	4230.34284288055	3006.00998947606	3479.20407943795	3284.94577544634	3262.65539492146	3396.93256324565	3352.19658325271	4121.94809336855	3256.71994812012	3337.26151380661	4095.52615793678	3284.94577544634	3352.19658325271	0.790092420950079	-0.339906672676593	0.80963210555117	-0.304661594379501	0.975865971140325	-0.0352450782970918	1
LOF down	ENSMUSG00000015776.12	Med22	chr2	26905262	26910677	-	3040.05075199155	2722.76997388671	3018.91347329382	2300.62858400334	2368.0045386483	2270.06551101512	2222.50970064308	2460.20974446603	2334.38291378662	2927.24473305736	2312.89954455559	2339.03411963191	3018.91347329382	2300.62858400334	2334.38291378662	0.790128518615483	-0.339840760472076	0.799056564426339	-0.323630461159736	0.988826766203634	-0.0162102993123404	1
LOF down	ENSMUSG00000068200.6	RP23-130J1.5	chrX	10660522	10660998	+	3570.65868854307	3363.97914407117	3211.39693485249	2424.82394257375	2800.98918730082	2796.17010786395	2753.7369252008	2658.51968119397	2708.1113705437	3382.01158915558	2673.99441257951	2706.78932564616	3363.97914407117	2796.17010786395	2708.1113705437	0.790652054875765	-0.338885152582258	0.800348920839148	-0.321298999112406	0.987884201863837	-0.017586153469852	1
LOF down	ENSMUSG00000029388.14	Eif2b1	chr5	124570213	124579131	-	1654.86633676959	1687.99103717524	1772.42206052353	1279.33277129326	1472.65870175916	1292.51417585034	1392.90288013955	1312.34516952313	1356.32759078405	1705.09314482279	1348.16854963425	1353.85854681558	1687.99103717524	1292.51417585034	1356.32759078405	0.790671497171711	-0.338849676851931	0.794008556615413	-0.332773540264586	0.995797199644891	-0.00607613658734539	1
LOF down	ENSMUSG00000034024.8	Cct2	chr10	117051001	117063814	-	14812.6589636209	14456.581921676	15624.0757737309	11003.9499253744	12799.2305727047	11721.2837896608	12407.8505809428	11443.6498782417	12111.528285544	14964.4388863426	11841.4880959133	11987.6762482428	14812.6589636209	11721.2837896608	12111.528285544	0.79130852722587	-0.337687790942459	0.801077563902745	-0.319986157321683	0.987805130093419	-0.0177016336207763	1
LOF down	ENSMUSG00000038976.12	Ppp1r9b	chr11	94991035	95006899	+	11676.293239648	10651.0212899605	10001.9844820339	7811.04400795263	8607.32609813964	9172.417838187	7794.12122120126	7679.26066752958	7464.34556033669	10776.4330038808	8530.26264809309	7645.90914968918	10651.0212899605	8607.32609813964	7679.26066752958	0.791566434368513	-0.33721765733365	0.709502777675669	-0.495119762495731	1.11566361580949	0.157902105162082	1
LOF down	ENSMUSG00000031701.6	Dnaja2	chr8	85537633	85555344	-	7925.84660340655	7284.51521319899	7790.21355386342	5834.77029244871	5859.98102660108	6516.23121507219	5825.37360682985	5725.32452623958	6014.8698435524	7666.85845682299	6070.32751137399	5855.18932554061	7790.21355386342	5859.98102660108	5825.37360682985	0.791762042505403	-0.336861189431244	0.763701241977395	-0.388919724967934	1.03674316471629	0.0520585355366898	1
LOF down	ENSMUSG00000031660.13	Brd7	chr8	88331039	88362194	-	5589.77073753285	5658.43402693811	6013.49818192966	4208.17282923042	4785.82147050441	4690.61326813556	4155.00558840425	4073.5194061998	4166.67470937681	5753.90098213354	4561.5358559568	4131.73323466029	5658.43402693811	4690.61326813556	4155.00558840425	0.792772741505431	-0.335020736766356	0.718075136761955	-0.477793284596136	1.10402477529067	0.14277254782978	1
LOF down	ENSMUSG00000050471.17	Fam118b	chr9	35216965	35267805	-	1039.0342431922	1084.68585734651	1084.06113108323	844.046126206675	853.196888790218	845.733553692685	837.972603567434	772.242224199389	813.342173367992	1069.26041054065	847.658856229859	807.852333711605	1084.06113108323	845.733553692685	813.342173367992	0.792752493100591	-0.335057585468114	0.755524403361323	-0.404449739841705	1.04927450334316	0.0693921543735912	1
LOF down	ENSMUSG00000026470.14	Stx6	chr1	155158715	155208256	+	6683.67532839924	6462.63035565221	7029.5818823509	5136.62356805776	5508.73979244343	5354.36829165438	5408.47875081211	5292.54225255684	5546.85730803897	6725.29585546745	5333.24388405186	5415.95943713597	6683.67532839924	5354.36829165438	5408.47875081211	0.793012530402822	-0.334584432732145	0.805311699816592	-0.312380801422232	0.984727442285303	-0.0222036313099127	1
LOF down	ENSMUSG00000052763.7	Zfp212	chr6	47920476	47932639	+	2116.010748074	2061.3453421792	2132.3446670812	1655.53618754538	1760.03789334269	1591.14560998182	1763.78592930583	1732.29562377053	1758.45486644365	2103.23358577813	1668.9065636233	1751.51213984	2116.010748074	1655.53618754538	1758.45486644365	0.793495584564779	-0.333705899733924	0.832771096697753	-0.264008097544982	0.952837565702369	-0.0696978021889422	1
LOF down	ENSMUSG00000016481.15	Cr1l	chr1	195097382	195131586	-	2490.76354814669	2368.99939723322	2380.64117697287	1802.6413695414	1947.7922985106	1997.09771575431	1832.10649099436	1991.26507055643	1933.39159088313	2413.46804078426	1915.8437946021	1918.92105081131	2380.64117697287	1947.7922985106	1933.39159088313	0.793813616848039	-0.333127784765987	0.795088651842164	-0.330812366009181	0.998396361221895	-0.00231541875680602	1
LOF down	ENSMUSG00000109865.1	Hspa14	chr2	3488850	3512814	-	4068.57790733124	3793.55770143612	4208.8762858294	2997.56952821399	3424.28272282421	3161.29369725128	3250.10672032561	2918.65565701944	3143.18127613021	4023.67063153225	3194.38198276316	3103.98121782509	4068.57790733124	3161.29369725128	3143.18127613021	0.7938974819981	-0.332975374373067	0.771430244190504	-0.374392386452035	1.02912413400536	0.0414170120789675	1
LOF down	ENSMUSG00000031171.11	Ftsj1	chrX	8238668	8252406	-	914.116643167967	919.171766126488	932.364127921745	716.233427095378	795.721050473511	684.75254623118	711.0915604316	731.413707814225	727.00976390435	921.884179072067	732.235674600023	723.171677383392	919.171766126488	716.233427095378	727.00976390435	0.794281636698727	-0.332277445423099	0.784449602021925	-0.350247332523344	1.01253367284713	0.0179698871002455	1
LOF down	ENSMUSG00000001017.15	Chtop	chr3	90498956	90509498	-	14654.4689187304	14171.0385276628	14700.2982686296	10332.33036495	12189.9866865477	12039.7462174651	11685.6046430926	11478.645749429	11751.4312618602	14508.6019050076	11520.6877563209	11638.5605514606	14654.4689187304	12039.7462174651	11685.6046430926	0.794059126561644	-0.332681658776861	0.802183465206498	-0.317995865596613	0.98987221876636	-0.014685793180247	1
LOF down	ENSMUSG00000032399.8	Rpl4	chr9	64173375	64178666	+	46454.1703043379	47260.5903750438	51214.9118126408	40062.0464903097	39618.7339721314	35414.6551124913	40297.977018812	36294.2180083317	39171.0588886152	48309.8908306742	38365.1451916441	38587.751305253	47260.5903750438	39618.7339721314	39171.0588886152	0.794146799588385	-0.332522377868831	0.798754678219058	-0.324175619095436	0.994231171652168	-0.00834675877339535	1
LOF down	ENSMUSG00000049305.6	Ccdc71	chr9	108460527	108465938	+	2303.97087521326	2220.54210167327	2191.73547492272	1666.38820916804	1827.73165847126	1844.28241156984	1535.12119222587	1591.14560998182	1493.77787427222	2238.74948393642	1779.46742640305	1540.01489215997	2220.54210167327	1827.73165847126	1535.12119222587	0.794848838233651	-0.331247575454235	0.687890674329557	-0.539748797598566	1.15548715500227	0.208501222144331	1
LOF down	ENSMUSG00000001767.5	Crnkl1	chr2	145917479	145935014	-	3034.21348096238	3077.1722837128	3255.0456008565	2386.2389768043	2660.49269363776	2398.3837053685	2565.50680626303	2355.22213090418	2391.18055159165	3122.14378851056	2481.70512527019	2437.30316291962	3077.1722837128	2398.3837053685	2391.18055159165	0.794872143430044	-0.331205275841091	0.780650517086643	-0.35725127009126	1.01821766082533	0.0260459942501688	1
LOF down	ENSMUSG00000089739.2	RP23-118A2.10	chr2	167607850	167661496	-	4698.41945137865	4850.44729918843	5229.25329766087	4097.24105264326	4060.34866686243	3605.74126132978	3986.29562994891	4099.18304507047	3984.92226840072	4926.04001607598	3921.11032694516	4023.46698114003	4850.44729918843	4060.34866686243	3986.29562994891	0.79599644220281	-0.32916611239461	0.816775131344766	-0.291989154273715	0.974560085947102	-0.0371769581208955	1
LOF down	ENSMUSG00000024142.14	Mlst8	chr17	24473550	24479078	-	1710.90413864962	1621.65905405271	1638.61385490468	1290.18479291592	1347.48909831389	1320.51087280016	1324.58231845102	1405.66749268922	1368.82307110116	1657.059015869	1319.39492134332	1366.3576274138	1638.61385490468	1320.51087280016	1368.82307110116	0.7962268746665	-0.328748528037662	0.82456787255537	-0.278289843954855	0.965629272213771	-0.0504586840828069	1
LOF down	ENSMUSG00000047832.9	Cdca4	chr12	112820229	112829423	-	5456.68095806779	5454.38421218976	5883.98328772104	4389.03985627471	4785.82147050441	4205.3371876719	4562.14036418077	4226.33471038427	4657.40630001224	5598.34948599286	4460.06617148367	4481.96045819243	5456.68095806779	4389.03985627471	4562.14036418077	0.796675195545189	-0.327936437529922	0.800586042262339	-0.320871631465734	0.995115020109396	-0.00706480606418785	1
LOF down	ENSMUSG00000020329.12	Polrmt	chr10	79736123	79746581	-	1646.11043022584	1605.86572473782	1694.42690323768	1254.01138750706	1360.26150682872	1326.34351799804	1266.02183700371	1318.17781472101	1374.50283488166	1648.80101940045	1313.53880411127	1319.56749553546	1646.11043022584	1326.34351799804	1318.17781472101	0.796663022799995	-0.327958481260403	0.800319432126076	-0.321352155932853	0.995431312574321	-0.0066063253275509	1
LOF down	ENSMUSG00000079562.7	Maea	chr5	33335509	33373296	+	4246.030946618	4070.88856420556	4367.72880800793	3270.07584896072	3513.68958242798	3323.44123375236	3194.33483323293	3353.77098878134	3478.28733917987	4228.21610627716	3369.06888838035	3342.13105373138	4246.030946618	3323.44123375236	3353.77098878134	0.796806218910777	-0.327699187495519	0.790435249695419	-0.339280809115051	1.00806007730274	0.0115816216195324	1
LOF down	ENSMUSG00000067194.6	Eif1ax	chrX	159372178	159389928	+	5766.64004971669	5627.47910148093	6365.54971756857	4339.6028688826	4789.65319305886	5020.74098633561	4484.05972225103	4243.83264597791	4534.72340235338	5919.88962292206	4716.66568275902	4420.87192352744	5766.64004971669	4789.65319305886	4484.05972225103	0.796748923239362	-0.327802930602819	0.746782829600342	-0.421239338098844	1.06690846610086	0.0934364074960245	1
LOF down	ENSMUSG00000030298.10	Sec13	chr6	113728062	113740743	-	4724.10344390699	4524.47298212914	5038.20093990561	3790.97288684827	4056.51694430798	3538.08257703436	3750.65940698236	3693.23093929799	3879.27866208337	4762.25912198058	3795.1908027302	3774.38966945457	4724.10344390699	3790.97288684827	3750.65940698236	0.796930764479657	-0.327473703269669	0.792562851532707	-0.335402747018167	1.00551112500227	0.00792904374849783	1
LOF down	ENSMUSG00000032382.14	Snx1	chr9	66088133	66126587	-	4637.71183267528	4110.05602090648	4272.56040508115	3185.67123634005	3601.81920118026	3605.74126132978	3180.39186145976	3175.29204572619	3282.90346513058	4340.1094195543	3464.41056628336	3212.86245743884	4272.56040508115	3601.81920118026	3180.39186145976	0.798231157646512	-0.325121501699913	0.740272225157121	-0.433872194871056	1.07829407955579	0.108750693171144	1
LOF down	ENSMUSG00000079316.10	Rab9	chrX	166457253	166479867	-	1194.30565256811	1240.09221780501	1282.26900785554	991.151308202695	993.693382453277	983.383980362666	1030.38561403716	919.22488318598	1060.97987419791	1238.88895940955	989.409557006213	1003.53012380702	1240.09221780501	991.151308202695	1030.38561403716	0.798626502796311	-0.324407145608149	0.810024269071937	-0.303962961772548	0.985929105199916	-0.0204441838356012	1
LOF down	ENSMUSG00000029622.16	Arpc1b	chr5	145114215	145130705	+	9014.49765034668	8446.90425077475	8807.72835808807	6731.87074658838	7339.02593261765	6912.85108852807	6512.76211524707	7105.32838005813	6836.16368621309	8756.37675306983	6994.5825892447	6818.08472717276	8807.72835808807	6912.85108852807	6836.16368621309	0.798798725373771	-0.3240960641816	0.778642230621525	-0.360967501735659	1.02588672173118	0.036871437554059	1
LOF down	ENSMUSG00000014959.12	Gorasp2	chr2	70661576	70712636	+	3092.00246415116	2916.08032470094	3210.68138295078	2369.35805428017	2531.49136763804	2466.04238966391	2589.20985827741	2480.04073813882	2522.95107129931	3072.92139060096	2455.63060386071	2530.73388923851	3092.00246415116	2466.04238966391	2522.95107129931	0.79911923922677	-0.323517306369618	0.82355959282889	-0.280055047646011	0.970323515365574	-0.0434622587236066	1
LOF down	ENSMUSG00000020720.13	Psmd12	chr11	107479484	107504362	+	4275.21730176385	3948.33232872203	4361.28884089258	3178.43655525828	3554.56128967541	3325.77429183151	3358.86190015632	3141.46270357848	3495.32663052138	4194.94615712615	3352.9240455884	3331.88374475206	4275.21730176385	3325.77429183151	3358.86190015632	0.799277015723463	-0.323232491675662	0.794261384998239	-0.33231423010877	1.00631483642533	0.0090817384331078	1
LOF down	ENSMUSG00000025373.14	Rnf41	chr10	128411657	128441441	+	1964.24170131559	1809.28380631358	1948.44782834299	1421.6148325681	1628.48208564001	1528.15304184471	1563.0071357722	1578.31379054649	1517.63288215033	1907.32444532405	1526.08332001761	1552.98460282301	1948.44782834299	1528.15304184471	1563.0071357722	0.800117318141081	-0.321716542523384	0.814221516758862	-0.296506747996591	0.982677688654157	-0.0252097945267938	1
LOF down	ENSMUSG00000006599.13	Gtf2h1	chr7	46796103	46823800	+	2934.39614636358	2717.08437533335	3101.2019419899	2199.34304885854	2480.40173357875	2322.55931779605	2304.77323410477	2285.23038852961	2341.19863032323	2917.56082122894	2334.10136674445	2310.40075098587	2934.39614636358	2322.55931779605	2304.77323410477	0.800018066379596	-0.321895514909924	0.791894631356023	-0.336619615255642	1.01025822717053	0.0147241003457176	1
LOF down	ENSMUSG00000081888.1	Spcs2-ps	chr2	129378271	129379396	-	2166.79500602777	2145.3658541344	2120.89583665392	1690.50381277394	1751.09720738232	1706.63198489986	1451.46336158685	1491.99064161785	1535.80812624794	2144.35223227203	1716.07766835204	1493.08737648421	2145.3658541344	1706.63198489986	1491.99064161785	0.800277884633619	-0.321427053423575	0.696288302832705	-0.522243307570263	1.14934845433688	0.200816254146688	1
LOF down	ENSMUSG00000019173.11	Rab5c	chr11	100715009	100738215	-	8461.70808388432	8288.33922445328	8703.25778043913	6443.68928349781	7360.73902709285	6576.89072513015	6132.11898583956	6401.91136919373	6810.03677282278	8484.43502959224	6793.77301190694	6448.02237595202	8461.70808388432	6576.89072513015	6401.91136919373	0.800733695079452	-0.32060557843128	0.759982527235159	-0.395961844963984	1.05362119046677	0.0753562665327043	1
LOF down	ENSMUSG00000039395.8	Mreg	chr1	72159442	72212307	-	2720.75202669597	2467.54977215812	2722.6749859879	1999.18353892952	2099.783959837	2243.23534310487	2066.34841678359	2074.08863236634	2124.23165390802	2636.992261614	2114.06761395713	2088.22290101932	2720.75202669597	2099.783959837	2074.08863236634	0.801696555856859	-0.31887181855624	0.791895725830155	-0.336617621314468	1.01237641485744	0.0177458027582286	1
LOF down	ENSMUSG00000094090.2	RP23-21B19.9	chr5	146574888	146576120	+	3889.95741383865	3677.31879767855	3793.85618284044	2785.35221648203	3267.18209809188	3059.80567080815	2875.04077962737	2795.00357882438	2817.16283512936	3787.04413145255	3037.44666179402	2829.06906452704	3793.85618284044	3059.80567080815	2817.16283512936	0.802062652654905	-0.318213158526233	0.747038842518565	-0.420744836542153	1.07365588909786	0.10253167801592	1
LOF down	ENSMUSG00000036737.12	Oxsr1	chr9	119238432	119322427	-	3449.82717823926	3055.69335584455	3242.88121852751	2488.7302921294	2608.12581872698	2733.17753972684	2679.83917480301	2532.53454491975	2629.73063037277	3249.46725087044	2610.01121686107	2614.03478336518	3242.88121852751	2608.12581872698	2629.73063037277	0.803212039192555	-0.31614720115492	0.80445026262842	-0.313924869808786	0.998460783104453	-0.00222233134613414	1
LOF down	ENSMUSG00000020390.12	Ube2b	chr11	51985497	52000762	-	8259.15477917213	8623.1578059289	9048.86934896269	6788.54241506226	7104.0136159449	6940.84778547789	5835.13368707107	6250.26259404883	6628.28433184669	8643.72731135457	6944.46793882835	6237.89353765553	8623.1578059289	6940.84778547789	6250.26259404883	0.803411270240554	-0.315789395258883	0.721667090244889	-0.470594628987603	1.11327131457238	0.154805233728719	1
LOF down	ENSMUSG00000025935.10	Tram1	chr1	13564698	13589910	-	9078.70763166755	8541.66422666408	8779.82183392157	6753.57478983369	7233.01494194461	7231.31351633235	6462.56741686366	7030.67052152526	7412.09173355607	8800.0645640844	7072.63441603688	6968.44322398166	8779.82183392157	7231.31351633235	7030.67052152526	0.803702559740566	-0.31526641808839	0.791862738419203	-0.336677719839934	1.01495186065327	0.0214113017515445	1
LOF down	ENSMUSG00000022439.9	Parvg	chr15	84324026	84342978	+	10362.9072580849	9925.15987464828	10121.4816496186	8053.40582419197	8493.65166235771	7896.23506889073	7445.54692687205	7065.66639271254	7915.31880450861	10136.5162607839	8147.7641851468	7475.51070803107	10121.4816496186	8053.40582419197	7445.54692687205	0.80380319781746	-0.315085777920893	0.737483225568558	-0.43931785998556	1.0899274314989	0.124232082064667	1
LOF down	ENSMUSG00000025393.12	Atp5b	chr10	128083273	128090391	+	40803.6919481017	38560.3611220582	43121.3042524544	30489.3576389457	34910.8241935674	33053.6003363893	34348.5109632009	31140.4927114844	32679.0888875005	40828.4524408714	32817.9273896341	32722.6975207286	40803.6919481017	33053.6003363893	32679.0888875005	0.8038004241567	-0.315090756196095	0.801467985300649	-0.319283201919214	1.00291020839114	0.00419244572311882	1
LOF down	ENSMUSG00000024816.12	Frmd8	chr19	5849702	5875274	-	7185.09690980492	6755.75454773653	7070.36834074809	5424.80503114833	5802.50518828437	5665.8315452212	5174.23682502288	5897.97082409685	5938.76100889366	7003.73993276318	5631.04725488463	5670.32288600446	7070.36834074809	5665.8315452212	5897.97082409685	0.804005761056725	-0.314722255898346	0.809613569384401	-0.304694624618568	0.993073475371787	-0.0100276312797781	1
LOF down	ENSMUSG00000022890.13	Atp5j	chr16	84827866	84835625	-	7542.3378967901	8185.36671732021	7984.84367112721	6294.1725411412	6363.21392208513	6434.57418230186	5508.86814757892	5156.05835492644	5609.3347096245	7904.18276174584	6363.98688184273	5424.75373737662	7984.84367112721	6363.21392208513	5508.86814757892	0.80514166659237	-0.312685443699244	0.686314309890581	-0.543058659202005	1.17313839299189	0.230373215502761	1
LOF down	ENSMUSG00000022898.13	Dscr3	chr16	94497783	94526830	-	2320.89896119785	2043.65681334652	2281.17946263586	1727.88299836309	1820.06821336237	1804.62042422425	1716.37982527706	1656.47123619809	1806.16488219987	2215.24507906008	1784.19054531657	1726.33864789167	2281.17946263586	1804.62042422425	1716.37982527706	0.805414516967846	-0.312196618917609	0.779299168390052	-0.359750818081703	1.03351132612107	0.047554199164094	1
LOF down	ENSMUSG00000081272.1	RP23-167N13.2	chr2	49308155	49309462	+	6382.47214329409	6196.6706899895	6408.48283167087	5159.53339148337	5304.38125620625	4834.09634000343	4900.95457826877	4451.47481502246	4901.63614257386	6329.20855498482	5099.33699589768	4751.3551786217	6382.47214329409	5159.53339148337	4900.95457826877	0.805683199028336	-0.311715423672914	0.750702893947076	-0.413686050314546	1.0732384349715	0.101970626641633	1
LOF down	ENSMUSG00000027746.13	Ufm1	chr3	53853376	53863830	-	2575.98770517256	2571.15401246378	2676.16411237707	2211.40085066149	2074.23914280736	2035.59317406032	1876.7240006685	2034.42664502075	1952.70278773684	2607.76861000447	2107.07772250972	1954.61781114203	2575.98770517256	2074.23914280736	1952.70278773684	0.808000262916775	-0.307572332468875	0.749536520856687	-0.415929320283008	1.07799985782316	0.108356987814133	1
LOF down	ENSMUSG00000026280.17	Atg4b	chr1	93751500	93790610	+	2344.83177241745	2269.81728913572	2321.96592103305	1976.27371550391	1855.83095720387	1776.62372727443	1708.01404221316	1717.13074625604	1626.68434673598	2312.20499419541	1869.5761333274	1683.94304506839	2321.96592103305	1855.83095720387	1708.01404221316	0.808568504099254	-0.306558087004676	0.728284494366109	-0.457425965294993	1.11023715368679	0.150867878290317	1
LOF down	ENSMUSG00000025228.4	Actr1a	chr19	46376814	46395735	-	7340.95204628375	7749.47082822929	7589.14346948429	6145.86157896489	6393.8677025207	5815.14726228694	5962.0147302069	6363.41591088772	6178.44704043087	7559.85544799911	6118.29218125751	6167.95922717516	7589.14346948429	6145.86157896489	6178.44704043087	0.809313382159557	-0.305229643972185	0.815883222847555	-0.293565420478523	0.991947572270124	-0.0116642234936616	1
LOF down	ENSMUSG00000020297.10	Nsg2	chr11	32000463	32059202	+	19223.8846803644	19934.3402612518	19959.6047461621	14852.8002608769	17473.9320891302	15523.0019296394	14555.0682340107	14708.7646600153	15431.9181916259	19705.9432292594	15949.9114265488	14898.5836952173	19934.3402612518	15523.0019296394	14708.7646600153	0.809395989879153	-0.305082393638601	0.756045195192476	-0.403455615823084	1.07056561568795	0.0983732221844827	1
LOF down	ENSMUSG00000029017.13	Pmpcb	chr5	21737141	21757152	+	2619.76723789134	2565.46841391042	2584.57346895882	1947.33499117683	2199.40874625263	2149.91301993878	2002.21074662701	1869.94605044051	2057.21044129809	2589.93637358686	2098.88558578941	1976.45574612187	2584.57346895882	2149.91301993878	2002.21074662701	0.810400443499166	-0.303293131219841	0.763129073856217	-0.390001003144112	1.06194413404285	0.0867078719242718	1
LOF down	ENSMUSG00000027649.15	Ctnnbl1	chr2	157737401	157891614	+	2719.58457249014	2602.74067109356	2643.24872489864	2107.7037551561	2200.68598710411	2155.74566513666	2134.66897847212	2011.09606422923	2100.37664602991	2655.19132282745	2154.71180246562	2082.04722957709	2643.24872489864	2155.74566513666	2100.37664602991	0.811509055464645	-0.301320901283499	0.78414207355874	-0.350813024412905	1.03490054013006	0.0494921231294062	1
LOF down	ENSMUSG00000026254.17	Eif4e2	chr1	87213914	87240488	+	3609.18467733559	3610.35508138342	3794.57173474214	3044.59495524551	2950.42636692426	2947.81888300885	2898.74383164176	3063.30525792688	3144.31722888631	3671.37049782038	2980.94673505954	3035.45543948498	3610.35508138342	2950.42636692426	3063.30525792688	0.811943860427398	-0.300548115115972	0.82679082410426	-0.274405717363405	0.982042660315023	-0.0261423977525672	1
LOF down	ENSMUSG00000032604.16	Qars	chr9	108507706	108515941	+	6867.54936581809	6132.23390638475	6527.26444735392	5200.52991761341	5415.50121028521	5244.71456193422	5129.61931534874	5093.06578678933	5512.77872535595	6509.01590651892	5286.91522994428	5245.15460916467	6527.26444735392	5244.71456193422	5129.61931534874	0.812244939307848	-0.300013245016156	0.805829127550839	-0.311454140711758	1.00796175211054	0.0114408956956022	1
LOF down	ENSMUSG00000020392.8	Cdkn2aipnl	chr11	51967661	51977334	+	7346.20559021	7976.26303719109	7900.40854672601	6331.55172673036	6499.87869319374	6030.95513460852	4952.5435738295	4695.27938429387	5323.07461508716	7740.95905804237	6287.46185151087	4990.29919107018	7900.40854672601	6331.55172673036	4952.5435738295	0.81223292932658	-0.300034577089374	0.644661617979438	-0.633386004372611	1.25993685163444	0.333351427283237	1
LOF down	ENSMUSG00000028932.7	Psmc2	chr5	21785283	21803787	+	4504.0383261073	4490.99112398158	4756.2734906338	3875.37749946893	3735.92949058591	3557.91357070716	3800.85410536577	3771.38838494959	3806.57768569293	4583.76764690756	3723.073520254	3792.94005866943	4504.0383261073	3735.92949058591	3800.85410536577	0.812229983508386	-0.300039809486207	0.827472147552753	-0.273217342802888	0.981579846416044	-0.0268224666833181	1
LOF down	ENSMUSG00000061559.15	Wdr61	chr9	54714735	54734519	-	2556.72471077631	2569.89054611859	2747.00375064588	2202.96038939942	2154.70531645074	2047.25846445608	1949.22745388897	1848.94852772814	1954.97469324904	2624.53966918026	2134.97472343541	1917.71689162205	2569.89054611859	2154.70531645074	1949.22745388897	0.813466356979182	-0.297845414168367	0.730686952131695	-0.452674649502707	1.11328983582639	0.15482923533434	1
LOF down	ENSMUSG00000028931.11	Kcnab2	chr4	152390742	152477871	-	4705.42417661365	4461.29966486959	4502.96811743019	3497.96830303652	3939.0107859716	3693.23093929799	3523.38896707971	3517.08505432199	3481.69519744818	4556.56398630448	3710.07000943537	3507.38973961663	4502.96811743019	3693.23093929799	3517.08505432199	0.814225372580438	-0.296499915996478	0.769744428073144	-0.377548575774577	1.05778664045499	0.081048659778099	1
LOF down	ENSMUSG00000028330.8	Ncbp1	chr4	46138613	46172403	+	6213.77501055109	6048.21339442955	6349.09202382935	4748.36235000269	5189.42957957284	5236.54885865719	5160.29385324971	4713.94384892709	5060.66952842794	6203.69347627	5058.11359607757	4978.30241020158	6213.77501055109	5189.42957957284	5060.66952842794	0.815339058163588	-0.294527967066131	0.802473950275637	-0.31747353432611	1.01603180749174	0.0229455672599785	1
LOF down	ENSMUSG00000082264.1	RP23-149D11.8	chr4	102046568	102049127	-	2329.65486774161	2335.51753908565	2452.91191904508	1838.81477495026	2003.99089597583	1965.60143168576	1819.55781639851	1993.59812863558	1934.52754363923	2372.69477529078	1936.13570087062	1915.89449622444	2335.51753908565	1965.60143168576	1934.52754363923	0.816007065482469	-0.293346450910702	0.807476172736817	-0.308508405955857	1.01056488480241	0.0151619550451552	1
LOF down	ENSMUSG00000027091.14	Zc3h15	chr2	83644435	83664622	+	4997.87145517505	5010.2757918551	5294.36852071603	4014.04222020289	4170.19138008991	4313.82438835248	4089.47362107036	3954.53344416304	3949.7077329616	5100.83858924873	4166.01932954843	3997.90493273167	5010.2757918551	4170.19138008991	3954.53344416304	0.816732240524007	-0.292064915639091	0.783774052595633	-0.351490282614808	1.04205062392564	0.059425366975717	1
LOF down	ENSMUSG00000047731.17	Wbp1l	chr19	46599084	46657389	+	4893.38430375291	4842.23476794469	5000.27668911524	4068.30232831617	4116.54726432765	3851.87888868034	3881.72334165015	4339.48802722315	3907.67748098588	4911.96525360428	4012.24282710805	4042.96294995306	4893.38430375291	4068.30232831617	3907.67748098588	0.816830457862862	-0.29189143265248	0.823084598773664	-0.280887372674609	0.992401581902856	-0.0110040599778706	1
LOF down	ENSMUSG00000059119.9	Nap1l4	chr7	143513579	143549106	-	9169.7690597226	9584.65569461929	9910.39383861563	7976.23589265308	7903.56638897285	7577.77264108645	7119.2813873799	7266.30938751963	7521.14319814172	9554.93953098584	7819.19164090413	7302.24465768042	9584.65569461929	7903.56638897285	7266.30938751963	0.818340253807695	-0.289227275661646	0.764237663043274	-0.387906736764251	1.07079288731856	0.0986794611026053	1
LOF down	ENSMUSG00000014867.9	Surf4	chr2	26920040	26933928	-	8717.96428206487	8856.26734661665	9552.61788776308	7273.26604754095	7862.69468172542	7072.66556695	7313.08869502694	7627.93338978823	7314.39979653142	9042.2831721482	7402.87543207212	7418.47396044886	8856.26734661665	7273.26604754095	7314.39979653142	0.818695377166938	-0.288601345831377	0.820420442405415	-0.285564655008304	0.99789734001091	-0.00303669082307236	1
LOF down	ENSMUSG00000020088.10	Sar1a	chr10	61680299	61693297	+	6256.97081616694	6273.11040387355	6633.16612880628	5065.48253742034	5478.08601200785	5156.05835492644	5281.59770767628	5030.07321865221	5161.76932372089	6387.74911628226	5233.20896811821	5157.81341668313	6273.11040387355	5156.05835492644	5161.76932372089	0.81925712373062	-0.287611782320847	0.807453975225163	-0.308548066172772	1.01461773533552	0.0209362838519256	1
LOF down	ENSMUSG00000052214.9	Opa3	chr7	19228334	19256543	+	2059.38921909105	1906.57071489329	2014.27860329986	1563.89689384294	1711.50274098636	1629.64106828783	1561.61283859489	1549.15056455708	1534.67217349184	1993.4128457614	1635.01356770571	1548.47852554794	2014.27860329986	1629.64106828783	1549.15056455708	0.820208202822734	-0.28593792289682	0.776797705924526	-0.364389154758729	1.05588391490748	0.0784512318619084	1
LOF down	ENSMUSG00000046993.6	RP23-419J18.2	chrX	60045111	60046229	-	4755.62470746451	4496.67672253494	4663.96729531384	3585.99025619807	3958.16939874384	3872.87641139271	3496.89732071069	3700.23011353544	3562.34784313131	4638.7562417711	3805.67868877821	3586.49175912581	4663.96729531384	3872.87641139271	3562.34784313131	0.820409284391538	-0.285584276314554	0.773158056211308	-0.371164721354382	1.06111457780286	0.0855804450398289	1
LOF down	ENSMUSG00000013465.19	Nelfb	chr2	25199712	25211489	-	4030.05191853872	3993.8171171489	4168.08982743221	3258.01804715776	3563.50197563579	3183.45774900322	3296.11852717706	3242.9507300216	3365.82801632592	4063.98628770661	3334.99259059892	3301.63242450819	4030.05191853872	3258.01804715776	3296.11852717706	0.820621024408261	-0.28521197816486	0.812412294425179	-0.299716022446765	1.01010414298185	0.0145040442819052	1
LOF down	ENSMUSG00000017288.15	Vps53	chr11	76046226	76179647	-	1672.96187696002	1651.3505131647	1656.50265244731	1336.00443976714	1407.51941833356	1352.00715686872	1356.65115352931	1394.00220229346	1422.21285063788	1660.27168085734	1365.17700498981	1390.95540215355	1656.50265244731	1352.00715686872	1394.00220229346	0.822261212264276	-0.282331319260213	0.837787826047408	-0.255343174431599	0.981467128907345	-0.0269881448286138	1
LOF down	ENSMUSG00000017843.14	Ppp2r5c	chr12	110447120	110583062	+	10364.0747122907	10302.3045786878	10492.1375347019	7890.62549985211	8975.17146336656	8766.46573241452	8272.36515302095	8106.21029601443	8625.28927707145	10386.1722752268	8544.08756521106	8334.62157536894	10364.0747122907	8766.46573241452	8272.36515302095	0.822640655170963	-0.281665722825161	0.802472879758481	-0.317475458912972	1.02513203364399	0.0358097360878106	1
LOF down	ENSMUSG00000022312.11	Eif3h	chr15	51786558	51865523	-	14456.5854308415	14571.5573590884	14838.3997856587	12388.1855723534	12164.441869518	11578.9672468325	9521.65542389685	9984.32204973198	10682.4997183695	14622.1808585295	12043.8648962346	10062.8257306661	14571.5573590884	12164.441869518	9984.32204973198	0.823670901950929	-0.279860071752687	0.688189116796225	-0.539123017791058	1.19686708471273	0.259262946038371	1
LOF down	ENSMUSG00000001175.14	Calm1	chr12	100199435	100209814	+	23048.4646586763	22844.1032542267	23640.4037285331	18060.1755404622	19885.3628167289	19568.5246388894	17200.0499793808	17964.5472094722	18001.4433259254	23177.657213812	19171.3543320268	17722.0135049261	23048.4646586763	19568.5246388894	17964.5472094722	0.8271480657071	-0.273782489141364	0.764616257003112	-0.387192220311932	1.08178195026755	0.113409731170569	1
LOF down	ENSMUSG00000002741.9	Ykt6	chr11	5955693	5967780	+	6652.73779194465	6407.03783646381	6811.33855233085	5536.94258791579	5607.08733800757	5307.70713007133	5407.08445363479	5522.34847335334	5697.93902460034	6623.7047269131	5483.91235199823	5542.45731719616	6652.73779194465	5536.94258791579	5522.34847335334	0.827922224509235	-0.272432848400718	0.836760928468977	-0.257112606615189	0.989437002064719	-0.0153202417855286	1
LOF down	ENSMUSG00000038324.13	Trpc4ap	chr2	155634271	155692384	-	12491.760002423	13044.0265477524	13119.644117763	10708.5337812021	11276.7594777378	10106.8075988875	10331.742083918	10922.2113975512	10966.4879073947	12885.1435559795	10697.3669526091	10740.1471296213	13044.0265477524	10708.5337812021	10922.2113975512	0.830209372998791	-0.26845287493989	0.833529489443464	-0.262694853658577	0.996016797861718	-0.0057580212813133	1
LOF down	ENSMUSG00000047514.6	Tspyl1	chr10	34282190	34285275	+	5024.13917480631	4954.6832726667	5080.41850210621	3989.92661659698	4373.27267547561	4161.00908416801	3922.15795979233	4068.85329004149	4071.25467786436	5019.74698319307	4174.73612541353	4020.75530923273	5024.13917480631	4161.00908416801	4068.85329004149	0.831662659371324	-0.265929636644448	0.800987643938005	-0.320148107143336	1.03829649017119	0.0542184704988884	1
LOF down	ENSMUSG00000026914.15	Psmd14	chr2	61711694	61800376	+	4954.09192245628	4714.6246670804	5065.3919121704	4042.98094452997	4105.05209666431	4106.18221930793	3909.60928519648	3693.23093929799	3937.2122526445	4911.36950056903	4084.7384201674	3846.68415904632	4954.09192245628	4105.05209666431	3909.60928519648	0.831690309534672	-0.265881672376741	0.783220272594161	-0.352509987258641	1.06188557502472	0.0866283148818997	1
LOF down	ENSMUSG00000079477.9	Rab7	chr6	87999106	88045270	-	7778.16364636855	7830.33267432152	8005.59467627666	6675.1990781145	6800.03029329209	6620.05229959446	6777.67857893727	6671.37957733581	6750.96722950555	7871.36366565558	6698.42722366702	6733.34179525954	7830.33267432152	6675.1990781145	6750.96722950555	0.850986882094353	-0.232791201851903	0.855422526675846	-0.22529089527703	0.99481467410178	-0.00750030657487331	1
LOF up	ENSMUSG00000039146.5	Ifi44l	chr3	151758737	151762892	-	2.33490841166786	1.89519951778657	1.4311038034102	466.636929774262	346.13227075172	369.789705545629	358.334374570434	423.45004136613	1.13595275610055	1.88707057762154	394.18630202387	260.973456230888	1.89519951778657	369.789705545629	358.334374570434	208.887948706562	7.70658545172114	138.295546189808	7.11161088499529	1.5104459576729	0.59497456672585	2
LOF up	ENSMUSG00000040264.10	Gbp2b	chr3	142594847	142619179	+	54.2866205712777	38.535723528327	43.6486660040111	583.597607262901	596.471477642263	675.420313914572	515.889955607239	480.60996430536	38.6223937074186	45.4903367012053	618.496466273245	345.040771206673	43.6486660040111	596.471477642263	480.60996430536	13.5962164961698	3.76513333447916	7.58492454063394	2.92313482775053	1.79253154376582	0.841998506728633	2
LOF up	ENSMUSG00000075015.3	Gm10801	chr2	98662237	98664083	+	0.583727102916965	1.89519951778657	1.4311038034102	25.3213837862002	8.94068596037653	13.9983484749134	15.3372689504855	43.1615744643163	9.08762204880438	1.30334347470458	16.08680607383	22.5288218212021	1.4311038034102	13.9983484749134	15.3372689504855	12.3427219194667	3.62558867954391	17.2854065397523	4.11148262998825	0.714054476594538	-0.485893950444335	2
LOF up	ENSMUSG00000064364.1	mt-Th	chrM	11546	11612	+	22.1816299108447	33.4818581475628	23.6132127562683	252.008057681707	293.765395840943	333.627305318769	223.087548370698	228.639691756919	279.444378000735	26.4255669382253	293.133586280473	243.723872709451	23.6132127562683	293.765395840943	228.639691756919	11.0928021701759	3.47155194788563	9.22303287869665	3.20524124084541	1.20272824742911	0.266310707040223	2
LOF up	ENSMUSG00000075014.1	Gm10800	chr2	98666547	98667301	-	1.16745420583393	5.05386538076419	7.155519017051	80.7872720797817	29.3765395840943	30.329755028979	36.2517266102384	115.486374918036	59.0695433172284	4.45894620121637	46.8311888976183	70.2692149485009	5.05386538076419	30.329755028979	59.0695433172284	10.5027481347147	3.39269496578616	15.7591528979049	3.97811808254731	0.666453850835534	-0.585423116761153	2
LOF up	ENSMUSG00000083921.2	AC026231.3	chr5	4764834	4765665	+	4.08608972041875	3.15866586297762	2.1466557051153	47.0254270315147	21.7130944752002	24.4971098310984	27.8859435463373	26.8301679102507	55.6616850489268	3.13047042950389	31.0785437792711	36.7925988351716	3.15866586297762	24.4971098310984	27.8859435463373	9.92775510235258	3.31146752753725	11.7530574601219	3.55496420561513	0.844695530166296	-0.243496678077884	2
LOF up	ENSMUSG00000064355.1	mt-Tk	chr8	7700	7764	+	91.0614280550465	108.65810568643	69.4085344653947	448.550227069833	528.777712513698	522.6050097301	481.032526174318	367.456647466477	489.595637879336	89.7093560689571	499.97764977121	446.02827050671	91.0614280550465	522.6050097301	481.032526174318	5.57330552441923	2.47853324304148	4.97192589548699	2.31380479377371	1.12095506682393	0.164728449267767	2
LOF up	ENSMUSG00000064353.1	mt-Td	chrM	6942	7011	+	228.237297240533	557.820391401848	377.095852198588	2395.88521824666	2154.70531645074	1801.12083710552	1727.53420269559	1642.47288772317	1778.90201605346	387.71784694699	2117.23712393431	1716.30303549074	377.095852198588	2154.70531645074	1727.53420269559	5.46076777379759	2.44910380564677	4.42668050750163	2.14622525171085	1.23360332071482	0.302878553935914	2
LOF up	ENSMUSG00000105710.1	RP24-511F2.2	chr3	152383806	152385217	-	6.42099813208661	8.21253124374181	5.0088633119357	37.3791855891527	31.931021287059	20.9975227123701	22.3087548370698	24.4971098310984	12.495480317106	6.54746422925471	30.1025765295273	19.7671149950914	6.42099813208661	31.931021287059	22.3087548370698	4.59759312544634	2.20087879709702	3.01904894825847	1.59409414765554	1.52286140577431	0.606784649441473	2
LOF up	ENSMUSG00000033860.13	Fgg	chr3	83007724	83015049	+	10.5070878525054	10.1077307615284	5.0088633119357	34.9676252285622	24.2675761781649	33.8293421477074	18.1258633051192	55.9933938996536	17.0392913415082	8.5412273086565	31.0215145181448	30.3861828487603	10.1077307615284	33.8293421477074	18.1258633051192	3.63197388350789	1.86075382865605	3.55758976440822	1.83090015900974	1.02090857125907	0.0298536696463123	2
LOF up	ENSMUSG00000092680.1	Snord55		117155770	117155848	-	12.2582691612563	13.8981297971015	12.8799342306918	36.1734054088575	31.931021287059	44.3281035038924	50.1946983834071	31.4962840685551	27.2628661464131	13.0121110630165	37.477510066603	36.3179495327918	12.8799342306918	36.1734054088575	31.4962840685551	2.88020213515721	1.52617006484662	2.79108819137087	1.48082771066097	1.03192802866704	0.0453423541856442	2
LOF up	ENSMUSG00000044303.6	Cdkn2a	chr4	89274471	89294653	-	32.1049906604331	25.269326903821	47.9419774142417	137.458940553658	67.6937651285652	83.9900908494804	306.74537900971	148.149188026167	76.1088346587366	35.1054316594986	96.3809321772345	177.001133898205	32.1049906604331	83.9900908494804	148.149188026167	2.74547064716569	1.45705348698246	5.04198710943105	2.33399242974273	0.544521552232905	-0.876938942760267	2
LOF up	ENSMUSG00000082969.1	RP23-236D1.1	chr11	86817794	86818577	-	28.6026280429313	48.6434542898554	43.6486660040111	104.902875685687	91.96134130673	79.3239746911759	96.2065052348635	102.654555482698	64.7493070977312	40.2982494455993	92.0627305611976	87.8701226050976	43.6486660040111	91.96134130673	96.2065052348635	2.28453423728686	1.19190006372992	2.18049478113728	1.12465553743334	1.04771369188754	0.0672445262965836	2
LOF up	ENSMUSG00000038253.6	Hoxa5	chr6	52201754	52204587	-	31.5212635575161	46.1165215994733	39.3553545937805	101.285535144801	77.9116919404241	69.991742374567	129.669637490468	131.817781472101	78.3807401709377	38.9977132502566	83.0629898199307	113.289386377836	39.3553545937805	77.9116919404241	129.669637490468	2.12994514029317	1.09081627230734	2.90502639605644	1.53855127250647	0.73319304195809	-0.447735000199129	2
LOF up	ENSMUSG00000112413.1	RP23-246F14.1	chr14	11760447	11760871	-	270.265648650555	296.282857947301	349.904879933794	752.406832504236	653.947315958969	519.105422611372	531.227224557725	604.262042500428	570.248283562475	305.484462177217	641.819857024859	568.579183540209	296.282857947301	653.947315958969	570.248283562475	2.10099018604923	1.07106942304324	1.86123765342398	0.89626227867812	1.12881349793466	0.17480714436512	2
LOF up	ENSMUSG00000020159.8	Gabrp	chr11	33550781	33578959	-	50.7842579537759	29.0597259393941	35.777595085255	72.346810817715	68.9710059800475	101.488026443122	80.869236284378	104.98761356185	103.37170080515	38.5405263261417	80.9352810802948	96.4095168837927	35.777595085255	72.346810817715	103.37170080515	2.10000456131283	1.07039246149914	2.50151012645614	1.32279929256986	0.839494727246173	-0.252406831070724	2
LOF up	ENSMUSG00000024347.16	Psd2	chr11	35964830	36014715	+	23.9328112195955	29.6914591119896	23.6132127562683	45.8196468512195	51.0896340592945	64.1590971766864	90.6293165255961	48.9942196621969	55.6616850489268	25.7458276959511	53.6894593624001	65.0950737455733	23.9328112195955	51.0896340592945	55.6616850489268	2.08536544237199	1.06030022573207	2.52837370444339	1.33820971577038	0.824785291314786	-0.27790949003831	2
LOF up	ENSMUSG00000085415.1	RP23-188K3.5	chr12	23558058	23558842	-	106.238332730888	111.185038376812	111.626096665996	225.480893715212	223.517149009413	232.139278875647	178.470038696558	190.144233450907	219.238881927406	109.683155924565	227.045773866757	195.95105135829	111.185038376812	225.480893715212	190.144233450907	2.07001496221451	1.04964119566405	1.78651908496375	0.83715132597775	1.15868617337302	0.212489869686301	2
LOF up	ENSMUSG00000041750.13	Cd1d2	chr3	86986551	86989780	+	694.635252471188	756.184607596842	689.792033243716	1433.67263437105	1623.37312223408	1362.5059182249	1134.95790233593	1798.78777902637	1511.95311836983	713.537297770582	1473.18389161001	1481.89959991071	694.635252471188	1433.67263437105	1511.95311836983	2.06462072299922	1.04587677859171	2.07683551307107	1.05438695817882	0.994118556816383	-0.00851017958711453	2
LOF up	ENSMUSG00000060730.8	AC133896.3	chr5	108517179	108517532	+	187.960127139263	279.226062287222	238.994335169503	554.658882935815	445.757057167344	440.947976959772	366.700157634335	388.454170178847	326.018441000857	235.393508198663	480.454639020977	360.390922938013	238.994335169503	445.757057167344	366.700157634335	2.04107004775804	1.02932569526579	1.53101470680261	0.614488141315352	1.33314855741695	0.414837553950442	2
LOF up	ENSMUSG00000030954.10	Gp2	chr7	119442537	119459285	-	395.766975777702	236.899939723322	322.713907669	831.988324403722	449.588779721791	596.096339223396	508.918469720655	855.065786009293	650.900929245613	318.460274390008	625.89114778297	671.628394991854	322.713907669	596.096339223396	650.900929245613	1.96536647775559	0.974798353879952	2.10898642312081	1.07654980762125	0.931900962571067	-0.101751453741301	2
LOF up	ENSMUSG00000038236.8	Hoxa7	chr6	52214491	52221854	-	141.261958905905	217.31621137286	203.216740084248	360.52827390828	471.301874196991	258.969446785898	349.968591506533	403.619047693336	322.610582732555	187.264970121004	363.599864963723	358.732740644141	203.216740084248	360.52827390828	349.968591506533	1.9416331027035	0.957270610171043	1.91564252733621	0.93782836892628	1.01356754978885	0.019442241244764	2
LOF up	ENSMUSG00000020607.7	Fam84a	chr12	14146830	14152054	-	55.4540747771116	37.9039903557314	59.3908078415233	115.754897308344	71.5254876830123	103.821084522274	105.966585476082	90.9892650869371	79.5166929270383	50.9162909914554	97.0338231712101	92.1575144966858	55.4540747771116	103.821084522274	90.9892650869371	1.90575199571182	0.93036038690977	1.80998090595702	0.855974477956869	1.05291276247147	0.0743859089529006	2
LOF up	ENSMUSG00000081631.1	RP23-440I12.2	chr3	14162079	14162457	+	321.049906604331	385.988968455865	339.171601408217	635.446155015597	595.194236790781	669.587668716691	421.077747549693	473.610790067903	508.906834733045	348.736825489471	633.40935350769	467.86512411688	339.171601408217	635.446155015597	473.610790067903	1.81629615002277	0.860999455566646	1.34159942374943	0.423953974341361	1.35382895808548	0.437045481225286	2
LOF up	ENSMUSG00000085099.1	AC175113.2	chr5	30240082	30240448	-	141.845686008822	174.99008880896	216.812226216645	376.203416252118	296.319877543908	265.968621023355	264.916463690204	300.964492210638	286.260094537338	177.882667011476	312.830638273127	284.047016812727	174.99008880896	296.319877543908	286.260094537338	1.75863474237738	0.814455875032891	1.59682234129311	0.675203810812419	1.1013340037272	0.139252064220473	2
LOF up	ENSMUSG00000089901.1	RP23-78F6.3	chr4	43925390	43933411	+	833.562302965425	579.931052442691	643.281159632885	1261.24606858883	978.366492235489	1318.17781472101	1031.77991121448	1117.53481991392	1272.26708683261	685.591505013667	1185.93012518178	1140.52727265367	643.281159632885	1261.24606858883	1117.53481991392	1.72979116063892	0.790597870406829	1.66356680955511	0.734279806634583	1.03980865132884	0.0563180637722458	2
LOF up	ENSMUSG00000064342.1	mt-Ti	chr18	3706	3774	+	361.910803808518	586.248384168646	446.504386663982	774.11087574955	832.7610351665	799.07239210964	730.611720914036	661.421965439658	708.834519806741	464.887858213715	801.981434341897	700.289402053478	446.504386663982	799.07239210964	708.834519806741	1.72510729237677	0.786686092537896	1.50636199608282	0.591068507856551	1.14521429567579	0.195617584681345	2
LOF up	ENSMUSG00000028133.17	Rwdd3	chr4	121155398	121171695	-	79.9706130996242	85.9157114729913	84.4351244012018	144.69362163543	145.605457068989	131.817781472101	140.824014909003	158.647949382352	170.392913415082	83.4404829912724	140.70562005884	156.621625902146	84.4351244012018	144.69362163543	158.647949382352	1.68629920411124	0.753860539832766	1.8770460127673	0.908464015953319	0.898379257962437	-0.154603476120553	2
LOF up	ENSMUSG00000071724.5	Smpd5		76294348	76296896	+	108.573241142555	113.080237894599	103.755025747239	204.982630650192	169.873033247154	163.314065540656	131.063934667785	197.143407688364	181.752440976087	108.469501594798	179.389909812667	169.986594444079	108.573241142555	169.873033247154	181.752440976087	1.65382810075778	0.725809288274407	1.56713723161637	0.648131519761737	1.0553179819817	0.0776777685126705	2
LOF up	ENSMUSG00000083757.2	Rps15a-ps4	chr15	132219988	132220489	-	8551.60205773353	8590.30768095394	9403.06754030672	15395.4013420097	13646.0412572376	14403.1340516463	11236.6409519966	11296.6672192551	13918.8291205	8848.32575966473	14481.5255502979	12150.7124305839	8590.30768095394	14403.1340516463	11296.6672192551	1.63664018975343	0.710737184661747	1.37322164221995	0.457564499720184	1.19182522284432	0.253172684941563	2
LOF up	ENSMUSG00000076138.1	Gm26377	chr9	78478528	78478635	-	13298.4708586543	19813.679225286	22205.7221656144	33450.7537617508	29703.5132420738	26358.8901782619	24587.0364248056	29528.3495787902	28570.3477686849	18439.2907498516	29837.7190606955	27561.9112574269	19813.679225286	29703.5132420738	28570.3477686849	1.61815980156046	0.694354088320849	1.49473814537301	0.579892769065457	1.08257075432878	0.114461319255392	2
LOF up	ENSMUSG00000039328.11	Rnf122	chr4	31111820	31131482	+	175.701857978006	197.100749849804	191.767909656967	208.599971191078	362.736401820991	327.794660120889	441.992205209445	506.273603176035	537.305653635559	188.190172494926	299.710344377653	495.190487340346	191.767909656967	327.794660120889	506.273603176035	1.59259296276873	0.671377587873117	2.63133021653242	1.39579230964393	0.605242531994886	-0.724414721770814	2
LOF up	ENSMUSG00000026009.14	Icos	chr1	60977927	61000320	+	695.218979574105	614.676376935445	581.743696086246	1127.40446857606	840.424480275394	954.220754373263	999.711076136191	1086.03853584536	928.073401734147	630.546350865265	974.016567741572	1004.60767123857	614.676376935445	954.220754373263	999.711076136191	1.54471842776503	0.627343886745789	1.59323366134781	0.671957865951151	0.969549203761028	-0.0446139792053625	2
SOF up	ENSMUSG00000096768.7	Gm47283	chrY	90784738	90816464	+	4710.09399343699	9135.49340890387	8347.62848529169	5400.68942754242	3292.72691512153	3343.27222742515	496.369795124803	759.410404764052	1137.08870885665	7397.73862921085	4012.22952336303	797.622969581835	8347.62848529169	3343.27222742515	759.410404764052	0.542358918645796	-0.882680190215776	0.107819836514949	-3.21330546773355	5.03023317579044	2.33062527751778	3
SOF up	ENSMUSG00000095562.7	Gm21887	chrX	170009659	170019281	+	3123.52372770868	5643.90416396841	5138.37820614432	3475.05847961091	2067.85293854994	2389.05147305189	342.997105619948	521.438480690524	738.369291465355	4635.2686992738	2643.98763040425	534.268292591942	5138.37820614432	2389.05147305189	521.438480690524	0.570406550718079	-0.809937544672498	0.115261558121894	-3.11701666736459	4.94880131773727	2.30707912269209	3
SOF up	ENSMUSG00000072844.6	RP23-154O12.1	chrX	169975043	169978917	-	36.1910803808518	44.2213220816867	59.3908078415233	86.816172981258	63.8620425741181	39.661987345588	15.3372689504855	24.4971098310984	18.1752440976088	46.6010701013539	63.4467343003214	19.3365409597309	44.2213220816867	63.8620425741181	18.1752440976088	1.36148663887609	0.44518282437819	0.414937702453513	-1.26903334423003	3.28118324949905	1.71421616860822	3
SOF up	ENSMUSG00000035448.9	Ccr3	chr9	124021972	124031689	+	33.8561719691839	65.7002499499345	51.5197369227672	84.4046126206675	70.2482468315299	37.3289292664357	26.4916463690204	12.8318194353373	22.7190551220109	50.3587196139619	63.9939295728777	20.6808403087895	51.5197369227672	70.2482468315299	22.7190551220109	1.27076164889497	0.345693455831392	0.410670494947528	-1.28394679578557	3.09435828609342	1.62964025161696	3
SOF up	ENSMUSG00000056054.9	S100a8	chr3	90668978	90670035	+	640.932359002827	706.909420134391	1099.80327292074	1070.73280010218	1235.09190338344	1067.37407121215	593.970597536984	380.288466901814	512.314693001347	815.881684019319	1124.39959156592	495.524585813382	706.909420134391	1070.73280010218	512.314693001347	1.37814049952284	0.46272297630934	0.607348584383282	-0.719403313802036	2.26910959366481	1.18212629011138	3
SOF up	ENSMUSG00000048442.15	Smim5	chr11	115899966	115906269	+	267.930740238887	463.060415512519	528.792855360069	469.048490134852	445.757057167344	286.966143735725	177.075741519242	131.817781472101	221.510787439607	419.928003703825	400.590563679307	176.801436810317	463.060415512519	445.757057167344	177.075741519242	0.95395058235231	-0.0680135628723668	0.421027974440625	-1.24801200115399	2.26576531789775	1.17999843828163	3
SOF up	ENSMUSG00000093953.2	Trav3d-3	chr14	52972448	52973038	+	88.7265196433786	75.8079807114629	75.8485015807406	74.7583711783055	113.67443578193	102.654555482698	51.5889955607239	45.4946325434685	34.0785826830164	80.1276673118607	97.0291208143112	43.7207369290696	75.8485015807406	102.654555482698	45.4946325434685	1.21093155547221	0.276117323024481	0.545638459171742	-0.873982758991397	2.21929289462176	1.15010008201588	3
SOF up	ENSMUSG00000036412.5	Arsi	chr18	60911780	60918561	+	3542.05606050014	5926.92062529121	3292.96985164687	3327.95329761489	4089.72520644652	4217.00247806766	2106.78303492578	1657.63776523766	1872.0501420537	4253.98217914607	3878.22699404302	1878.82364740571	3542.05606050014	4089.72520644652	1872.0501420537	0.911669779214148	-0.13341674216495	0.441662322098129	-1.17898433255848	2.06417829549787	1.04556759039353	3
SOF up	ENSMUSG00000095854.4	Trav14d-1	chr14	52855614	52856166	+	199.634669197602	174.358355636365	153.843658866596	166.397664880744	194.140609425319	207.642169044549	76.6863447524274	95.6553812452416	115.867181122256	175.945561233521	189.393481116871	96.0696357066417	174.358355636365	194.140609425319	95.6553812452416	1.07643227705814	0.106257556267069	0.546019092684781	-0.872976696049812	1.97141874978274	0.979234252316882	3
SOF up	ENSMUSG00000096827.2	Trav14n-1	chr14	53166626	53167178	+	168.697132743003	170.567956600792	148.834795554661	157.957203618678	186.477164316425	219.30745944031	66.9262645112094	107.320671641003	112.459322853954	162.699961632819	187.913942458471	95.5687530020555	168.697132743003	186.477164316425	107.320671641003	1.15497226042717	0.207858202096106	0.58739259704151	-0.767603011517418	1.96626969124971	0.975461213613524	3
SOF up	ENSMUSG00000067750.3	Khdc1a	chr1	21349641	21352200	+	514.847304772763	482.64414386298	342.033809015038	336.412670302375	274.606783068708	365.123589387325	149.189797972904	142.316542828286	207.8793543664	446.508419216927	325.381014252803	166.461898389197	482.64414386298	336.412670302375	149.189797972904	0.728723133201936	-0.456557305336961	0.372807972313562	-1.42349538324747	1.9546876336352	0.96693807791051	3
SOF up	ENSMUSG00000032487.8	Ptgs2	chr1	150100031	150108227	+	428.455693541052	394.833232872203	398.562409249741	453.373347791014	411.27155417732	528.437654927981	184.047227405826	352.291769951987	203.335543341998	407.283778554332	464.360852298772	246.55818023327	398.562409249741	453.373347791014	203.335543341998	1.14014079801321	0.189211996365941	0.605371962292329	-0.724106236369631	1.88337232153254	0.913318232735573	3
SOF up	ENSMUSG00000089718.1	RP23-152P11.3	chr9	112227579	112228242	+	181.539129007176	261.537533454547	219.674433823466	265.271639664955	256.725411147955	209.975227123701	98.9950995894972	142.316542828286	149.945763805272	220.917032095063	243.990759312204	130.419135407685	219.674433823466	256.725411147955	142.316542828286	1.1044452163707	0.143321858683686	0.590353465148691	-0.76034909002892	1.87082024849726	0.903670948712606	3
SOF up	ENSMUSG00000082740.1	RP23-369H9.2	chr2	150469411	150470165	-	635.095087973658	1012.66827567063	985.314968647922	876.602191074646	940.049266691018	876.063308721664	389.008912471405	400.119460574608	657.716645782217	877.692777430737	897.571588829109	482.281672942743	985.314968647922	876.602191074646	400.119460574608	1.02264894039183	0.0323109751147021	0.549488027410369	-0.863840047714423	1.86109412649331	0.896151022829126	3
SOF up	ENSMUSG00000031239.5	Itm2a	chrX	107397099	107403376	-	9079.87508587339	9624.45488449281	8764.79524398577	10929.1915541961	9731.29804744411	9682.19102848177	3848.26020939454	6161.60638704105	6864.5625051156	9156.37507145066	10114.2268767073	5624.80970051706	9079.87508587339	9731.29804744411	6161.60638704105	1.10461037231243	0.143537579519118	0.614305296214337	-0.702972273380707	1.79814561117998	0.846509852899825	3
SOF up	ENSMUSG00000059552.13	Trp53	chr11	69580359	69591873	+	4065.07554471374	4129.63974925694	4424.97296014434	3241.13712463363	3560.94749393282	3076.13707736222	1447.2804700549	1976.10019304194	2148.08666178613	4206.56275137167	3292.74056530956	1857.15577496099	4129.63974925694	3241.13712463363	1976.10019304194	0.782762735260722	-0.353353019216774	0.441490091727601	-1.17954703476188	1.77300181799705	0.82619401554511	3
SOF up	ENSMUSG00000094220.5	Trav6-3	chr14	53428711	53430377	+	259.758560798049	217.31621137286	195.345669165492	277.329441467907	217.130944752002	195.976878648788	128.275340313151	132.984310511677	134.042425219865	224.140147112134	230.145754956232	131.767358681564	217.31621137286	217.130944752002	132.984310511677	1.02679398546613	0.0381467503407315	0.587879326302232	-0.766408050731072	1.74660672611959	0.804554801071804	3
SOF up	ENSMUSG00000034855.13	Cxcl10	chr5	92346638	92348889	-	844.653117920848	984.240282903827	934.51078362686	938.096980269704	1121.41746760151	909.892650869371	559.113168104062	765.243049961932	462.332771732923	921.134728150512	989.802366246862	595.562996599639	934.51078362686	938.096980269704	559.113168104062	1.07454679103699	0.103728306150757	0.646553623914964	-0.629158065535613	1.66196082009482	0.732886371686369	3
SOF up	ENSMUSG00000078861.8	Zfp931	chr2	178067695	178078476	-	438.37905429064	364.510040587617	367.078125574716	387.055437874775	378.063292038779	503.940545096882	234.241925789233	290.465730854453	240.821984293316	389.989073484324	423.019758336812	255.176546979001	367.078125574716	387.055437874775	240.821984293316	1.08469643663956	0.117291346235399	0.654317170220046	-0.611937965305852	1.65775328236424	0.729229311541251	3
SOF up	ENSMUSG00000067199.4	Frat1	chr19	41829970	41832583	+	572.636287961542	771.346203739135	761.347223414226	868.16172981258	730.581767047911	772.242224199389	383.431723762137	533.103771086285	513.450645757447	701.776571704968	790.328573686627	476.662046868623	761.347223414226	772.242224199389	513.450645757447	1.12618261360097	0.171440783346494	0.679221943403684	-0.55804502656135	1.65804804237845	0.729485809907844	3
SOF up	ENSMUSG00000093769.4	Hist2h3c1	chr3	96246685	96248509	+	313.46145426641	381.566836247697	324.14501147241	319.531747778241	335.914343939861	382.621524980966	191.01871329241	234.472336954799	209.015307122501	339.724433995506	346.022538899689	211.502119123237	324.14501147241	335.914343939861	209.015307122501	1.01853886348448	0.0265010289897514	0.62256964162323	-0.683692866534263	1.63602398091374	0.710193895524015	3
SOF up	ENSMUSG00000020513.15	Tubd1	chr11	86544991	86567360	+	542.866205712777	568.559855335972	536.663926278825	442.521326168357	542.827361880004	523.771538769676	260.733572158253	310.296724527247	371.456551244879	549.363329109191	503.040075606012	314.16228264346	542.866205712777	523.771538769676	310.296724527247	0.915678293310379	-0.127087271856639	0.571866133025084	-0.806250625897158	1.60121091358668	0.679163354040519	3
SOF up	ENSMUSG00000084235.2	AC121548.2	chr5	22528321	22529244	-	8753.5716353428	10871.4961671964	11660.6337901863	11130.5568443055	8282.90692186312	8732.63639026681	4952.5435738295	6247.92953596968	6523.77667828544	10428.5671975752	9382.03338547848	5908.08326269487	10871.4961671964	8732.63639026681	6247.92953596968	0.89964740196141	-0.152568416905252	0.566528761886735	-0.81977889333755	1.58799952003368	0.667210476432298	3
SOF up	ENSMUSG00000038268.4	Ovca2	chr11	75175942	75178835	-	1200.7266507002	1437.19296765482	1453.28591236306	1405.93969022426	1393.46976896726	1335.67575031465	861.675655581821	919.22488318598	851.96456707541	1363.73517690603	1378.36173650206	877.621701947737	1437.19296765482	1393.46976896726	861.675655581821	1.01072536651083	0.0153910425453132	0.643542615025038	-0.635892408835102	1.57056478143488	0.651283451380415	3
SOF up	ENSMUSG00000085903.1	RP23-480M17.3	chr16	95900398	95901728	+	2174.38345836569	2363.31379867986	2314.810402016	2117.34999659846	2224.95356328227	2144.0803747409	1275.78191724493	1314.67822760228	1548.30360656505	2284.16921968718	2162.12797820721	1379.58791713742	2314.810402016	2144.0803747409	1314.67822760228	0.946570840536637	-0.0792176148786394	0.603977982562235	-0.727432136441711	1.56722739547728	0.648214521563072	3
SOF up	ENSMUSG00000110569.1	RP23-162M13.9	chr8	71704205	71704968	-	2205.32099482029	1634.29371750462	1879.7548457793	2148.70028128614	2210.90391391597	2006.42994807092	1383.14279989833	1296.01376296907	1438.11618922329	1906.45651936807	2122.01138109101	1372.4242506969	1879.7548457793	2148.70028128614	1383.14279989833	1.11306571093181	0.154538766118392	0.719882272034094	-0.474167104221182	1.5461774156304	0.628705870339574	3
SOF up	ENSMUSG00000058331.15	Zfp85	chr13	67747800	67755228	-	949.723996445901	825.67525658235	711.974142196574	753.612612684531	853.196888790218	962.386457650296	536.804413266992	548.268648600775	587.287574903983	829.124465074942	856.398653041682	557.453545590583	825.67525658235	853.196888790218	548.268648600775	1.03289516727054	0.0466938366485529	0.67234000330722	-0.57273710438974	1.53626909330066	0.619430941038292	3
SOF up	ENSMUSG00000044867.5	Gimap1os	chr6	48738346	48741444	-	907.111917932963	1143.4370423979	912.328674674002	976.681946039152	1024.34716288885	1056.87530985596	563.296059636013	696.417836626942	747.45691351416	987.625878334955	1019.30147292799	669.056936592372	912.328674674002	1024.34716288885	696.417836626942	1.0320724631542	0.0455442678184371	0.677439657332936	-0.561835650182705	1.52348988132382	0.607379918001142	3
SOF up	ENSMUSG00000052033.13	Pfdn4	chr2	170496428	170519123	+	1789.1235704405	1862.9811259842	1941.29230932594	1976.27371550391	1849.44475294646	1757.95926264121	1076.39742088862	1307.67905336483	1312.02543329613	1864.46566858355	1861.22591036386	1232.03396918319	1862.9811259842	1849.44475294646	1307.67905336483	0.998262366385031	-0.00250905594103336	0.660797347971112	-0.597720198197502	1.5106936634205	0.595211142256469	3
SOF up	ENSMUSG00000078580.3	RP24-443B5.2	chr7	127389673	127393629	-	293.031005664316	265.959665662716	276.203034058168	288.181463090565	314.201249464661	282.30002757742	172.892849987291	202.976052886244	210.151259878601	278.397901795067	294.894246710882	195.340054250712	276.203034058168	288.181463090565	202.976052886244	1.05925455906618	0.0830493381216841	0.701657781869725	-0.51116053555344	1.5096455657394	0.594209873675124	3
SOF up	ENSMUSG00000082099.1	RP23-348N2.2	chr11	17095490	17095644	-	3577.66341377808	3490.95751176287	3940.54432268998	4449.32886528947	3385.96549727974	4233.33388462173	2296.40745104087	2809.00192729929	2930.75811073941	3669.72174941031	4022.87608239698	2678.72249635986	3577.66341377808	4233.33388462173	2809.00192729929	1.09623463496747	0.132556621724431	0.729952481217494	-0.454125545063528	1.50178903856734	0.586682166787959	3
SOF up	ENSMUSG00000031532.6	Saraf	chr8	34154575	34170821	+	11764.4360321885	12607.4989254889	13380.8205618854	11884.16945699	9654.66359635517	8947.27773354882	6426.31569025342	6790.36553937257	7087.20924531131	12584.2518398543	10162.0369289647	6767.96349164577	12607.4989254889	9654.66359635517	6790.36553937257	0.807520149650974	-0.308429835775721	0.537812146305882	-0.894825756527861	1.5014910972124	0.58639592075214	3
SOF up	ENSMUSG00000030291.12	Med21	chr6	146642547	146650732	+	2037.79131628312	2230.0180992622	2191.01992302102	2306.65748490481	2171.30944752002	2096.25268411828	1331.5538043376	1360.17286014575	1689.16174832151	2152.94311285545	2191.4065388477	1460.29613760162	2191.01992302102	2171.30944752002	1360.17286014575	1.01786550966562	0.0255469510439024	0.678279016701389	-0.560049232725591	1.50065899814462	0.585596183769493	3
SOF up	ENSMUSG00000012483.4	Rpa3	chr6	8255936	8259173	-	2842.75099120562	4121.4272180132	3570.60398950845	3611.31163998427	3669.51296630883	3577.74456437995	2193.22945991943	2315.56014355859	2775.13258315364	3511.59406624242	3619.52305689102	2427.97406221055	3570.60398950845	3611.31163998427	2315.56014355859	1.03073504186778	0.0436735248400782	0.691416495303685	-0.532373072124557	1.49075853536739	0.576046596964635	3
SOF up	ENSMUSG00000041396.13	Mettl18	chr1	163994889	163997243	+	463.47931971607	510.440403457183	510.188505915736	420.817282923042	484.074282711815	474.777319107479	327.659836669463	282.30002757742	320.338677220354	494.702743029663	459.889628247445	310.099513822412	510.188505915736	474.777319107479	320.338677220354	0.929628215584545	-0.105274237562582	0.626840093756703	-0.673830634901284	1.48303885607126	0.568556397338702	3
SOF up	ENSMUSG00000043572.7	Pars2	chr4	106651069	106655282	+	452.972231863565	477.590278482216	485.144189356058	443.727106348652	499.401172929603	426.949628484859	290.013812881907	302.131021250214	330.562252025259	471.902233233946	456.692635921038	307.569028719127	477.590278482216	443.727106348652	302.131021250214	0.967769600900854	-0.0472644721826522	0.651764300014763	-0.617577763372699	1.48484598017862	0.570313291190046	3
SOF up	ENSMUSG00000025512.15	Chid1	chr7	141493136	141539857	-	1055.37860207387	1312.7415326535	1103.38103242926	1122.58134785488	1113.75402249262	1006.71456115419	685.994211239896	761.743462843204	778.127637928875	1157.16705571888	1081.0166438339	741.955104003992	1103.38103242926	1113.75402249262	761.743462843204	0.934192378266704	-0.0982084201214299	0.641182360262634	-0.641193359213494	1.45698390374316	0.542984939092064	3
SOF up	ENSMUSG00000105195.1	RP24-503L4.2	chr3	104753123	104773270	-	3709.58573903731	3738.59691542031	3706.55885083242	3551.02263096951	4733.45459559363	3687.3982941001	2685.41636351228	2648.02091983778	3062.52863044707	3718.24716843001	3990.62517355441	2798.65530459904	3709.58573903731	3687.3982941001	2685.41636351228	1.07325441069035	0.101992101756637	0.752681351675914	-0.409888866979582	1.42590806627619	0.511880968736219	3
SOF up	ENSMUSG00000020621.6	Rdh14	chr12	10390772	10395562	+	921.12136840297	1050.57226602636	1058.30126262184	1050.23453703716	970.703047126595	1014.88026443122	665.079753580143	730.247178774649	748.59286627026	1009.99829901706	1011.93928286499	714.639932875017	1050.57226602636	1014.88026443122	730.247178774649	1.00192176942261	0.00276986654496412	0.707565481615676	-0.499064426616751	1.41601278673853	0.501834293161715	3
SOF up	ENSMUSG00000000581.8	C1d	chr11	17257579	17269176	+	4902.14021029667	5331.82797670622	4966.6457497351	5399.48364736213	5048.93308590978	5598.17286092578	3562.42928804458	3493.75447353047	4357.5147724017	5066.871312246	5348.8631980659	3804.56617799225	4966.6457497351	5399.48364736213	3562.42928804458	1.05565404535504	0.0781371180066068	0.750870891233627	-0.413363230542927	1.40590620528741	0.491500348549533	3
SOF up	ENSMUSG00000105617.4	RP24-80F7.7	chr5	31596938	31701972	+	1911.12253495014	2278.66155355206	1810.3463113139	1827.9627533276	1797.07787803568	1640.13982964402	1175.39252047812	1282.01541449415	1290.44233093022	2000.04346660537	1755.0601536691	1249.2834219675	1911.12253495014	1797.07787803568	1282.01541449415	0.877511005622257	-0.188510875274058	0.62462813575141	-0.678930539305983	1.40485347264519	0.490419664031925	3
SOF up	ENSMUSG00000089999.1	AC122831.1	chr3	104752727	104753165	-	8392.82828574012	9018.6227719737	9194.84193691053	9196.48543511187	11059.6285329858	8632.31489286326	6961.7258063431	6415.90971766864	7298.49645794601	8868.76433154145	9629.47628698698	6892.04399398592	9018.6227719737	9196.48543511187	6961.7258063431	1.08577428906754	0.118724226635083	0.777114346073511	-0.363801199760346	1.39718729238957	0.482525426395429	3
SOF up	ENSMUSG00000074890.4	Lcmt2	chr2	121128307	121140653	-	626.92290853282	647.526501910412	659.023301470397	576.362926181129	651.392834256004	628.759152331527	468.483851578466	452.613267355533	408.942992196197	644.49090397121	618.83830425622	443.346703710065	647.526501910412	628.759152331527	452.613267355533	0.960197111306112	-0.0585974991435278	0.687902189120532	-0.539724648132062	1.39583377766787	0.481127148988534	3
SOF up	ENSMUSG00000012429.9	Mplkip	chr13	17695192	17699748	+	2008.02123403436	2303.93088045588	2265.43732079835	1949.74655153742	2224.95356328227	2537.20066107805	1583.92159343196	1606.31048749631	1665.3067404434	2192.4631450962	2237.30025863258	1618.51294045722	2265.43732079835	2224.95356328227	1606.31048749631	1.02045056658611	0.0292062959733288	0.738216714874908	-0.437883691096669	1.38231842496147	0.467089987069997	3
SOF up	ENSMUSG00000078789.9	Dph1	chr11	75177643	75191241	-	762.931323512473	769.451004221348	732.009595444317	817.518962240179	826.374830909088	829.402147138619	603.730677778202	613.594274817037	574.792094586877	754.797307726046	824.431980095962	597.372349060705	762.931323512473	826.374830909088	603.730677778202	1.09225612181859	0.127311191744654	0.791434128005027	-0.337458816736193	1.3800973235408	0.464770008480848	3
SOF up	ENSMUSG00000027962.14	Vcam1	chr3	116109949	116129688	-	9074.03781484422	9666.78100705671	8107.91859822049	9250.74554322516	8853.83358247573	9229.57776112623	6226.93119389711	6957.17919203196	6675.99434760291	8949.57914004047	9111.38562894237	6620.03491117733	9074.03781484422	9229.57776112623	6675.99434760291	1.01807978748162	0.0258506306605298	0.739703488576267	-0.434981015073369	1.37633498179271	0.460831645733899	3
SOF up	ENSMUSG00000016559.14	H3f3b	chr11	116021912	116027962	-	36649.8898837445	43000.8135922321	45869.023555002	42353.0288328706	46413.6553020175	38722.9314687292	30901.8083408736	29509.685114157	33131.1980844285	41839.9090103262	42496.5385345391	31180.8971798197	43000.8135922321	42353.0288328706	30901.8083408736	1.01569385640994	0.0224656202248724	0.745242949073435	-0.424217274298439	1.36290300723107	0.446682894523311	3
SOF up	ENSMUSG00000064360.1	mt-Nd3	chrM	9459	9806	+	28197.5214335069	30383.2069359817	29293.2637520034	26248.6287448473	28152.9428483742	28296.4949129979	21164.0368544927	18693.6278592073	20910.6183342989	29291.330707164	27566.0221687398	20256.094349333	29293.2637520034	28152.9428483742	20910.6183342989	0.941098321695496	-0.0875826378077095	0.691538890869809	-0.532117706725933	1.36087548237785	0.444535068918224	3
SOF up	ENSMUSG00000100551.1	RP24-137J11.1	chr1	151520447	151520687	-	3685.0692007148	3845.35982158896	3764.51855487053	3812.67693009358	3392.35170153715	3385.26727284989	2403.76833369427	2547.69942243424	2848.96951230017	3764.98252572476	3530.09863482687	2600.14575614289	3764.51855487053	3392.35170153715	2547.69942243424	0.937613550848373	-0.0929346744440997	0.690612967889502	-0.534050670435095	1.35765413399881	0.441115995990995	3
SOF up	ENSMUSG00000101939.1	RP23-8J15.5	chr1	24612775	24613119	-	27751.5539268783	30253.7016355996	28986.2919861719	25833.8403628257	27972.8518883152	28099.3515053095	21035.7615141795	18735.622904632	20628.9020507859	28997.1825162166	27302.0145854835	20133.4288231991	28986.2919861719	27972.8518883152	20628.9020507859	0.941540253788963	-0.0869053190066742	0.69432362306026	-0.526319837618306	1.35605389550061	0.439414518611632	3
SOF up	ENSMUSG00000040331.16	Nsmce4a	chr7	130532526	130573118	-	4769.0504308316	5572.51831546512	5774.50384676016	5574.32177350494	5229.02404596879	5367.20011108971	4086.68502671572	3938.20203760897	4327.98000074308	5372.02419768563	5390.18197685448	4117.62235502259	5572.51831546512	5367.20011108971	4086.68502671572	1.00338006280327	0.00486817709902485	0.766493635080151	-0.383654283011695	1.30905204802953	0.388522460110719	3
SOF up	ENSMUSG00000022663.3	Atg3	chr16	45158785	45188538	+	3093.75364545991	3168.77359373915	3175.61933976723	2575.54646511065	2565.97687062806	2789.17093362649	2084.47428008871	1959.76878648788	2021.99590585897	3146.04885965543	2643.56475645507	2022.07965747852	3168.77359373915	2575.54646511065	2021.99590585897	0.840280896573425	-0.251056409435291	0.642736253530401	-0.637701245021891	1.30734946404214	0.3866448355866	3
SOF up	ENSMUSG00000037058.14	Paip2	chr18	35598617	35617186	+	17620.9700557544	18809.8552140317	18197.2004122624	14867.2696230404	15388.1977786595	15514.8362263624	11044.2279415269	11428.4850007272	12534.1027108134	18209.3418940162	15256.7678760208	11668.9385510225	18197.2004122624	15388.1977786595	11428.4850007272	0.837853886473203	-0.255229420938796	0.640821541983188	-0.642005448404879	1.30746835363906	0.386776027466083	3
SOF up	ENSMUSG00000080877.1	Rpl22-ps1	chrX	8038611	8038996	-	9002.23938118543	10396.4328214045	10240.9788172034	9415.9374279256	8358.26413210058	8874.9529330951	6659.16331886534	6517.39774411176	7261.0100169947	9879.88367326444	8883.05149770709	6812.52369332393	10240.9788172034	8874.9529330951	6659.16331886534	0.899104867170163	-0.153438700479047	0.689534808163686	-0.536304713129827	1.30392962983926	0.38286601265078	3
SOF up	ENSMUSG00000022024.10	Sugt1	chr14	79587691	79635196	+	3667.55738762729	4021.61337674311	4134.45888805207	3812.67693009358	3410.23307345791	3598.74208709232	2699.35933528545	2743.67630108303	2898.9514335686	3941.20988414082	3607.21736354794	2780.66235664569	4021.61337674311	3598.74208709232	2743.67630108303	0.91525634756554	-0.12775222081854	0.705535213395993	-0.503210005085407	1.29725112253446	0.375457784266867	3
SOF up	ENSMUSG00000030876.7	Mettl9	chr7	121034445	121078329	+	2705.57512202013	2883.86193289857	2935.90945269602	2750.38459125346	2738.40438557818	2944.31929589012	2249.0013470121	2026.26094174371	2263.95384290839	2841.78216920491	2811.03609090725	2179.73871055473	2883.86193289857	2750.38459125346	2249.0013470121	0.989180705463341	-0.015693995478792	0.767032299018399	-0.382640765330516	1.28962066751196	0.366946769851724	3
SOF up	ENSMUSG00000020107.10	Anapc16	chr10	59987409	60003135	-	3511.70225114846	4117.63681897763	3965.58863924966	3484.70472105327	3423.00548197273	3394.5995051665	2644.98174537009	2607.19240345262	2738.78209495842	3864.97590312525	3434.10323606417	2663.65208126038	3965.58863924966	3423.00548197273	2644.98174537009	0.888518666646104	-0.170526009128765	0.689176892178429	-0.537053765492924	1.28924616702915	0.366527756364159	3
SOF up	ENSMUSG00000028271.9	Gtf2b	chr3	142765045	142783606	+	4476.01942516728	4645.13401809489	4606.00759127573	4497.56007250128	4407.75817846563	4170.34131648462	3340.7360368512	3174.12551668661	3635.04881952175	4575.72034484597	4358.55318915051	3383.30345768652	4606.00759127573	4407.75817846563	3340.7360368512	0.952539242058341	-0.070149565896344	0.739403460593353	-0.435566299172342	1.2882536975063	0.365416733275997	3
SOF up	ENSMUSG00000026097.9	Ormdl1	chr1	53297095	53310309	+	2880.69325289522	2995.04697127538	2984.56698201197	2555.04820204563	2571.08583403399	2764.6738237954	2030.09669017335	1942.27085089423	2177.62143344475	2953.43573539419	2630.26928662501	2049.99632483744	2984.56698201197	2571.08583403399	2030.09669017335	0.890579488527096	-0.167183710302829	0.69410561410568	-0.526772896991889	1.28306048881994	0.35958918668906	3
SOF up	ENSMUSG00000019948.4	Actr6	chr10	89711971	89732295	-	1431.88258345531	1402.44764316206	1402.481727342	1380.61830643806	1408.79665918504	1375.33773766024	1026.20272250521	1086.03853584536	1137.08870885665	1412.27065131979	1388.25090109445	1083.10998906907	1402.481727342	1380.61830643806	1086.03853584536	0.982992105512569	-0.0247482646730852	0.766928058766136	-0.382836841968963	1.28172661604538	0.358088577295878	3
SOF up	ENSMUSG00000114759.1	RP23-79G18.5	chr13	100946405	100946815	-	3728.26500633065	3919.90433595523	3918.36221373713	3403.91744897349	3638.85918587325	3626.73878404215	2738.39965625032	2690.01596526252	2945.52549656872	3855.51051867434	3556.50513962963	2791.31370602719	3918.36221373713	3626.73878404215	2738.39965625032	0.922447266685836	-0.116461655546699	0.723980311428884	-0.465977630990674	1.27413308362661	0.349515975443974	3
SOF up	ENSMUSG00000035299.16	Mid1	chrX	169685199	170005736	+	1076.9765048818	1212.92769138341	1183.52284542023	541.395300952567	719.08659938457	620.593449054494	257.94497780362	326.628131081313	324.882488244756	1157.80901389515	627.025116463877	303.151865709896	1183.52284542023	620.593449054494	324.882488244756	0.541561785181145	-0.884802154856997	0.261832359285251	-1.93328468707931	2.06835315031151	1.04848253222232	3
SOF up	ENSMUSG00000000031.16	H19	chr7	142575529	142578143	-	626.92290853282	569.823321681163	482.997533650942	340.03001084326	348.686752454685	389.620699218423	256.550680626303	187.811175371755	229.46245673231	559.914587954975	359.445820838789	224.608104243456	569.823321681163	348.686752454685	229.46245673231	0.641965450751381	-0.639432438304388	0.401147083993314	-1.31779678478819	1.60032436073269	0.6783643464838	3
SOF up	ENSMUSG00000031584.16	Gsr	chr8	33652523	33698163	+	2170.29736864527	2159.2639839315	2372.77010605411	1847.25523621232	1427.95527195728	1410.33360884753	976.008024121804	874.896779682088	826.973606441198	2234.11048621029	1561.84803900571	892.626136748363	2170.29736864527	1427.95527195728	874.896779682088	0.699091673686677	-0.516446442575408	0.399544311822518	-1.32357257946515	1.7497225038639	0.807126136889747	3
SOF down	ENSMUSG00000071470.4	Ccnb1ip1	chr14	50789248	50807732	-	2.91863551458482	2.5269326903821	0.7155519017051	3.61734054088575	1.27724085148236	1.16652903957612	1.39429717731686	95.6553812452416	113.595275610055	2.05370670222401	2.02037014398141	70.2149846775378	2.5269326903821	1.27724085148236	95.6553812452416	0.983767614817396	-0.0236105319092334	34.1893925756294	5.09547688630705	0.0287740594583899	-5.11908741821629	4
SOF down	ENSMUSG00000028195.4	Cyr61	chr3	145646976	145649981	-	96.8986990842161	136.454365280633	118.781615683047	154.339863077792	141.773734514542	103.821084522274	242.607708853134	563.433526115264	555.480897733167	117.378226682632	133.311560704869	453.840710900522	118.781615683047	141.773734514542	555.480897733167	1.13574352307535	0.183637078008594	3.86648123529434	1.95102121141487	0.293740859960203	-1.76738413340628	4
SOF down	ENSMUSG00000040483.15	Xaf1	chr11	72301629	72313733	+	1445.3083068224	545.185727949937	605.356908842514	892.277333418485	578.59010572151	542.436003402894	2293.61885668624	2431.04651847663	2094.69688224941	865.283647871617	671.101147514296	2273.12075247076	605.356908842514	578.59010572151	2293.61885668624	0.775585149638548	-0.366642914892802	2.62702381821507	1.39342928089217	0.295233390828378	-1.76007219578497	4
SOF down	ENSMUSG00000054128.16	H2-T3	chr17	36185572	36190287	-	60.1238916004474	39.799189873518	49.3730812176519	32.5560648679717	29.3765395840943	37.3289292664357	96.2065052348635	132.984310511677	94.2840787563454	49.7653875638724	33.0871779061672	107.824964834295	49.3730812176519	32.5560648679717	96.2065052348635	0.664863261914735	-0.588870433434253	2.16666583166674	1.1154766614274	0.306860085296716	-1.70434709486166	4
SOF down	ENSMUSG00000096263.1	Snord14c	chr9	40803583	40803668	+	47.8656224391911	26.532793249012	38.6398026920754	21.7040432453145	22.9903353266825	25.6636388706746	73.8977503977937	59.4929810183819	86.3324094636416	37.6794061267595	23.4526724808905	73.2410469599391	38.6398026920754	22.9903353266825	73.8977503977937	0.622426807948937	-0.684023896288685	1.9437951520134	0.958876187695583	0.320212141338156	-1.64290008398427	4
SOF down	ENSMUSG00000027398.13	Il1b	chr2	129364570	129371139	-	54.8703476741947	39.1674567009225	49.3730812176519	77.169931538896	49.8123932078121	38.4954583060118	197.990199178994	144.649600907438	137.450283488166	47.803628530923	55.1592610175733	160.030027858199	49.3730812176519	49.8123932078121	144.649600907438	1.15387184430764	0.206482998811031	3.34765440984631	1.74315060108564	0.344680693716115	-1.53666760227461	4
SOF down	ENSMUSG00000085511.1	RP23-28C17.1	chr11	118114855	118118279	+	35.6073532779348	39.799189873518	35.777595085255	74.7583711783055	54.9213566137416	36.1624002268596	179.864335873875	146.982658986591	143.130047268669	37.0613794122359	55.2807093396356	156.659014043045	35.777595085255	54.9213566137416	146.982658986591	1.49159880760899	0.576859548927543	4.22701519823419	2.07963929958841	0.3528728281441	-1.50277975066086	4
SOF down	ENSMUSG00000065094.1	Snord1a	chr11	116674598	116674671	+	43.7795327187723	39.799189873518	42.2175622006009	26.5271639664955	39.5944663959532	29.1632259894029	86.4464249936455	76.9909166120237	86.3324094636416	41.9320949309637	31.7616187839505	83.2565836897703	42.2175622006009	29.1632259894029	86.3324094636416	0.757453660167523	-0.40077046543245	1.98550975873832	0.989509451695313	0.381490776781093	-1.39027991712776	4
SOF down	ENSMUSG00000021846.9	Peli2	chr14	48120823	48281575	+	139.510777597155	119.397569620554	123.074927093277	125.401138750706	118.78339918786	136.483897630406	188.230118937776	386.121112099695	398.719417391292	127.327758103662	126.889478522991	324.356882809588	123.074927093277	125.401138750706	386.121112099695	0.996557863052026	-0.00497452031509926	2.54741689982099	1.34903508449841	0.391203286404379	-1.35400960481351	4
SOF down	ENSMUSG00000038217.13	Tlcd2	chr11	75461715	75470899	+	220.065117799696	138.34956479842	159.568074080237	151.928302717201	146.882697920472	129.484723392949	342.997105619948	333.627305318769	335.106063049661	172.660918892784	142.765241343541	337.243491329459	159.568074080237	146.882697920472	335.106063049661	0.826853246577428	-0.274296798407847	1.95321265224399	0.965849028403669	0.423329864071626	-1.24014582681152	4
SOF down	ENSMUSG00000038807.18	Rap1gap2	chr11	74383356	74610915	-	286.61000753223	123.187968656127	130.945998012033	170.01500542163	137.942011960095	160.981007461504	366.700157634335	398.952931535032	330.562252025259	180.24799140013	156.312674947743	365.405113731542	130.945998012033	160.981007461504	366.700157634335	0.867208969894964	-0.205548415737027	2.02723542655399	1.0195136413451	0.427779111659022	-1.22506205708212	4
SOF down	ENSMUSG00000027233.4	Patl2	chr2	122120108	122186189	-	25.6839925283464	27.1645264216075	32.1998355767295	28.938724327086	34.4855029900238	26.8301679102507	54.3775899153576	74.6578585328715	74.9728819026361	28.3494515088945	30.0847984091202	68.0027767836217	27.1645264216075	28.938724327086	74.6578585328715	1.06121271516245	0.0857138667628462	2.39873342037275	1.26227283479849	0.442405440366753	-1.17655896803564	4
SOF down	ENSMUSG00000017309.11	Cd300lg	chr11	102041509	102055620	+	184.457764521761	138.981297971015	127.368238503508	116.960677488639	91.96134130673	106.154142601427	207.750279420213	239.138453113104	253.317464610422	150.269100332095	105.025387132265	233.40206571458	138.981297971015	106.154142601427	239.138453113104	0.698915391788194	-0.516810276247453	1.55322727825455	0.635268949634968	0.449976253683623	-1.15207922588242	4
SOF down	ENSMUSG00000033987.16	Dnah17	chr11	118021723	118130634	-	138.927050494238	82.1253124374181	109.47944096088	86.816172981258	77.9116919404241	89.822736047361	165.921364100707	201.809523846668	180.616488219987	110.177267964179	84.8502003230144	182.782458722454	109.47944096088	86.816172981258	180.616488219987	0.770124381288899	-0.376836623395347	1.65898521627783	0.730301030056474	0.464214131465729	-1.10713765345182	4
SOF down	ENSMUSG00000016179.11	Camk1g	chr1	193346346	193370298	-	54.8703476741947	46.1165215994733	52.2352888244723	54.2601081132862	62.5848017226357	43.1615744643163	105.966585476082	93.3223231660893	129.498614195462	51.0740526993801	53.3354947667461	109.595840945878	52.2352888244723	54.2601081132862	105.966585476082	1.04427770947954	0.0625054253281783	2.14582229436451	1.10153060468037	0.486656193395924	-1.0390251793522	4
SOF down	ENSMUSG00000031523.16	Dlc1	chr8	36567751	36953143	-	158.190044890497	133.927432590251	171.016904507519	96.46241442362	132.833048554166	152.815304184471	270.493652399471	222.807046559038	262.405086659226	154.378127329422	127.370255720752	251.901928539245	158.190044890497	132.833048554166	262.405086659226	0.8250537684588	-0.277439952545686	1.63172032785266	0.706393804738419	0.505634301648106	-0.983833757284105	4
SOF down	ENSMUSG00000061882.12	Ccdc62	chr5	123930679	123969895	+	112.075603760057	74.5445143662718	93.021747221663	85.6103928009627	109.842713227483	82.8235618099043	174.287147164608	160.981007461504	199.927685073696	93.2139551159973	92.75888927945	178.398613233269	93.021747221663	85.6103928009627	174.287147164608	0.99511805033934	-0.00706041291267314	1.91386164240394	0.936486537748391	0.51995297271824	-0.943546950661064	4
SOF down	ENSMUSG00000102715.1	RP24-295G1.1	chr3	50516399	50607223	-	61.8750729091983	65.068516777339	88.0128839097273	59.0832288344672	75.3572102374593	59.4929810183819	104.572288298765	123.652078195068	140.858141756468	71.6521578654215	64.6444733634361	123.0275027501	65.068516777339	59.4929810183819	123.652078195068	0.902198556041433	-0.148483117845315	1.71701043506844	0.779898807293309	0.525447334282199	-0.928381925138624	4
SOF down	ENSMUSG00000027875.12	Hmgcs2	chr3	98280435	98310738	+	541.115024404026	495.910540487486	626.823465893667	489.546753199871	523.668749107768	451.446738315957	1072.21452935667	949.554638214959	717.922141855546	554.61634359506	488.220746874532	913.230436475725	541.115024404026	489.546753199871	949.554638214959	0.880285538846282	-0.183956527207014	1.64659849465687	0.719488812269129	0.534608492418014	-0.903445339476143	4
SOF down	ENSMUSG00000090248.1	RP23-24M22.5	chr2	129016952	129021756	+	63.0425271150322	80.8618460922271	67.9774306619845	94.0508540630295	112.397194930448	82.8235618099043	149.189797972904	181.978530173874	205.607448854199	70.6272679564146	96.4238702677939	178.925259000326	67.9774306619845	94.0508540630295	181.978530173874	1.36524989650313	0.44916504744435	2.53337364133558	1.34105987245046	0.538905858270231	-0.891894825006107	4
SOF down	ENSMUSG00000116417.1	CT025619.1	chr9	41580741	41592827	+	257.423652386381	219.211410890647	218.243330020055	220.657772994031	205.63577708866	222.807046559038	308.139676187027	366.290118426901	524.810173318453	231.626131099028	216.366865547243	399.74665597746	219.211410890647	220.657772994031	366.290118426901	0.934121139616752	-0.0983184398221608	1.72582710802416	0.787287943723356	0.541259976317207	-0.885606383545517	4
SOF down	ENSMUSG00000074415.13	RP23-442M18.1	chr9	41327260	41655483	+	266.763286033053	233.741273860344	230.407712349042	239.950255878755	219.685426454966	234.472336954799	327.659836669463	383.788054020542	565.704472538072	243.637424080813	231.36933976284	425.717454409359	233.741273860344	234.472336954799	383.788054020542	0.949646141744202	-0.0745380600251862	1.74734015521421	0.805160485456336	0.543480981027292	-0.879698545481522	4
SOF down	ENSMUSG00000052911.9	Lamb2	chr9	108479736	108490530	+	160.524953302165	168.041023910409	191.767909656967	122.989578390115	158.377865583813	146.982658986591	267.705058044838	254.303330627593	224.918645707908	173.444628956514	142.783367653506	248.97567812678	168.041023910409	146.982658986591	254.303330627593	0.823221615523795	-0.280647230974758	1.43547643778121	0.521529650032948	0.573483196140951	-0.802176881007707	4
SOF down	ENSMUSG00000024940.10	Ltbp3	chr19	5740904	5758532	+	404.522882321457	334.818581475628	413.588999185548	399.113239677728	338.468825642826	306.797137408519	532.621521735041	544.769061482046	703.154756026238	384.310154327544	348.126400909691	593.515113081108	404.522882321457	338.468825642826	544.769061482046	0.905847521824744	-0.142659868037972	1.54436490006262	0.627013670554648	0.586550187580677	-0.76967353859262	4
SOF down	ENSMUSG00000055897.13	Ppp4r1l-ps	chr2	173579320	173659640	-	548.703476741947	383.462035765483	417.882310595778	429.257744185109	427.875685246591	471.277731988751	649.742484629658	621.75997809407	862.188141880315	450.015941034403	442.803720473484	711.230201534681	417.882310595778	429.257744185109	649.742484629658	0.983973410932197	-0.0233087635042902	1.58045557208452	0.660340480459606	0.622588466459958	-0.683649243963896	4
SOF down	ENSMUSG00000097636.7	Mirt1	chr19	53441212	53464796	-	1447.05948813116	1300.10686920159	1429.67269960679	1343.23912084891	1522.47109496698	1300.67987912737	1699.64825914926	2197.7407105614	2738.78209495842	1392.27968564651	1388.79669831442	2212.05702155636	1429.67269960679	1343.23912084891	2197.7407105614	0.99749835656729	-0.00361363046884411	1.58880219568037	0.667939521744658	0.627830424252486	-0.671553152213502	4
SOF down	ENSMUSG00000054672.13	RP23-284K1.6	chr7	140247284	140300736	+	966.652082430493	792.825131607383	902.310948050131	864.544389271694	699.927986612334	883.06248295912	1274.38762006761	1172.361684774	1418.80499236958	887.262720696002	815.844952947716	1288.5180990704	902.310948050131	864.544389271694	1274.38762006761	0.919507755614635	-0.121066351745977	1.45223964561436	0.538279543562007	0.633165303255196	-0.659345895307985	4
SOF down	ENSMUSG00000040488.17	Ltbp4	chr7	27305136	27337692	-	456.474594481066	420.734292948619	566.717106150439	415.994162201861	459.80670653365	423.45004136613	574.450437054547	766.409579001509	696.339039489635	481.308664526708	433.083636700547	679.066351848564	456.474594481066	423.45004136613	696.339039489635	0.899804363851245	-0.152316731203028	1.41087497877546	0.496590152717723	0.637763357765557	-0.648906883920751	4
SOF down	ENSMUSG00000025207.15	Sema4g	chr19	44989101	45003397	+	227.069843034699	216.684478200265	199.638980575723	226.686673895507	205.63577708866	181.978530173874	273.282246754105	311.463253566823	368.048692976577	214.464433936896	204.766993719347	317.598064432502	216.684478200265	205.63577708866	311.463253566823	0.954782991102375	-0.0667552290026793	1.48088920201077	0.566463704307222	0.644736277235297	-0.633218933309902	4
SOF down	ENSMUSG00000028763.17	Hspg2	chr4	137468769	137570630	+	637.429996385325	537.604929878791	588.899215103297	504.016115363414	540.272880177039	552.934764759079	790.566499538661	843.400495613532	706.56261429454	587.978047122471	532.407920099844	780.176536482244	588.899215103297	540.272880177039	790.566499538661	0.905489452719223	-0.143230258348356	1.32688038320543	0.408038319212535	0.682419805266677	-0.551268577560891	4
SOF down	ENSMUSG00000023007.15	Prpf40b	chr15	99295087	99317018	+	283.107644914728	283.64819449539	313.411732946834	315.914407237355	316.755731167626	299.797963171062	426.65493625896	440.947976959772	441.885622123113	293.389190785651	310.822700525348	436.496178447282	283.64819449539	315.914407237355	440.947976959772	1.05942110441429	0.0832761535351402	1.48777184762129	0.573153303635301	0.71208573149716	-0.489877150100161	4
SOF down	ENSMUSG00000063849.6	Ppcdc	chr9	57385095	57440124	-	1539.28837039204	1439.7199003452	1646.48492582343	1579.57203618678	1493.09455538288	1352.00715686872	1804.22054744802	2121.91632298896	2152.63047281054	1541.83106552022	1474.89124947946	2026.25578108251	1539.28837039204	1493.09455538288	2121.91632298896	0.956584208518215	-0.0640361196623548	1.31418793303327	0.394171600369501	0.72788996495374	-0.458207720031856	4
SOF down	ENSMUSG00000097415.2	RP23-285C18.2	chr7	75769038	75782099	-	4306.73856532137	4583.85590035312	4580.24772281434	4349.24911032497	4064.18038941688	4035.02394789379	5054.32726777363	5563.1769897385	5942.16886716196	4490.28072949628	4149.48448254521	5519.89104155803	4580.24772281434	4064.18038941688	5563.1769897385	0.924103576706819	-0.11387353196175	1.22929753707788	0.297834145421264	0.751733041704025	-0.411707677383013	4
SOF down	ENSMUSG00000040459.11	Arglu1	chr8	8665075	8690521	-	5702.43006839583	5839.74144747302	6263.22579562474	5520.06166539165	5670.94938058169	5918.96834680922	6692.62645112094	7465.78585328715	7983.47596987464	5935.13243716453	5703.32646426085	7380.62942476091	5839.74144747302	5670.94938058169	7465.78585328715	0.960943420326704	-0.0574766062578558	1.2435492388586	0.314463632806715	0.772742558395771	-0.371940239064571	4
SOF down	ENSMUSG00000031595.9	Pdgfrl	chr8	40926212	40990785	+	12.8419962641732	14.5298629696971	9.3021747221663	14.469362163543	42.1489480989179	34.9958711872835	83.6578306390118	87.4896779682088	89.7402677319432	12.2246779853455	30.5380604832481	86.9625921130546	12.8419962641732	34.9958711872835	87.4896779682088	2.49806665826748	1.32081197425125	7.11369184671383	2.8305984806063	0.35116318110145	-1.50978650635505	4
GOF up	ENSMUSG00000040809.10	Chil3	chr3	106147554	106167564	-	142.429413111739	155.406360458499	160.283625981942	200.159509929011	275.88402392019	234.472336954799	118.515260071933	97.9884393243938	86.3324094636416	152.706466517393	236.838623601333	100.945369619989	155.406360458499	234.472336954799	97.9884393243938	1.55094036947255	0.633143218727303	0.661041879379036	-0.59718642034271	2.34620591804177	1.23032963907001	5
GOF up	ENSMUSG00000076556.3	Igkv4-57	chr6	69575975	69576500	-	30.9375364545991	69.4906489855076	48.6575293159468	57.877448654172	172.427514950119	235.638865994376	40.434618142189	36.1624002268596	57.9335905611279	49.6952382520178	155.314609866222	44.8435363100588	48.6575293159468	172.427514950119	40.434618142189	3.12534189047611	1.64401401912344	0.902370888789088	-0.148207568902721	3.46347818763311	1.79222158802616	5
GOF up	ENSMUSG00000090173.8	Fbxw10	chr11	62847069	62877465	+	394.599521571868	147.193829214757	140.2481727342	541.395300952567	667.996965325275	568.099642273569	178.470038696558	215.807872321582	222.646740195707	227.347174506942	592.49730285047	205.641550404616	147.193829214757	568.099642273569	215.807872321582	2.60613444673525	1.3819115123922	0.904526527987867	-0.144765280006223	2.88121394574533	1.52667679239842	5
GOF up	ENSMUSG00000040808.4	S100g	chrX	162961992	162964599	-	87.5590654375447	121.924502310936	111.626096665996	225.480893715212	157.10062473233	184.311588253026	52.9832927380408	96.8219102848177	76.1088346587366	107.036554804826	188.964368900189	75.3046792271984	111.626096665996	184.311588253026	76.1088346587366	1.76541901264249	0.820010639993585	0.703541695306914	-0.507292167758206	2.50933103811615	1.32730280775179	5
GOF up	ENSMUSG00000025936.15	RP23-278E1.2	chr1	21285246	21298312	-	70.0472523500358	89.0743773359689	43.6486660040111	160.368763979268	125.169603445271	130.651252432525	37.6460237875553	58.3264519788058	74.9728819026361	67.5900985633386	138.729873285688	56.9817858896657	70.0472523500358	130.651252432525	58.3264519788058	2.0525176946692	1.0373946594703	0.843049309008895	-0.246311079636758	2.43463540357109	1.28370573910706	5
GOF up	ENSMUSG00000031780.2	Ccl17	chr8	94810453	94812036	+	175.701857978006	147.825562387353	134.523757520559	296.621924352631	265.666097108331	227.473162717343	85.0521278163286	142.316542828286	144.266000024769	152.683725961973	263.253728059435	123.878223556461	147.825562387353	265.666097108331	142.316542828286	1.72417673462462	0.785907663695076	0.811338751238716	-0.301623698701812	2.12510092978084	1.08753136239689	5
GOF up	ENSMUSG00000100017.2	RP23-170I24.2	chr14	56811989	56813899	+	56.0378018800286	80.2301129196316	62.2530154483437	155.545643258087	99.6247864156242	125.985136274221	73.8977503977937	65.3256262162625	55.6616850489268	66.1736434160013	127.051855315977	64.9616872209943	62.2530154483437	125.985136274221	65.3256262162625	1.91997672724871	0.941088823609785	0.981685212836356	-0.0266676107595199	1.95579672805845	0.967756434369305	5
GOF down	ENSMUSG00000056032.12	RP23-468A19.2	chr11	116752167	116759373	+	5707.68361232208	8.21253124374181	8.5866228204612	10.8520216226572	14.049649366306	8.16570327703282	7251.739619225	6088.11505754775	3547.58045730201	1908.16092212876	11.0224580886653	5629.14504469159	8.5866228204612	10.8520216226572	6088.11505754775	0.00577648245535213	-7.43559304263152	2.95003685454981	1.56073297804875	0.0019581051831414	-8.99632602068027	6
GOF down	ENSMUSG00000085882.1	RP23-192P17.5	chr11	59199836	59202385	-	167.529678537169	195.205550332017	159.568074080237	8.44046126206675	15.3268902177883	18.6644646332179	218.904656838747	180.812001134298	230.598409488411	174.101100983141	14.1439387043577	210.105022487152	167.529678537169	15.3268902177883	218.904656838747	0.0812398004635667	-3.62166949359926	1.20679893062536	0.271185323189748	0.067318422648476	-3.892854816789	6
GOF down	ENSMUSG00000087654.1	RP23-419P16.11	chr11	58889710	58891548	+	260.342287900966	395.464966044798	296.238487305911	30.1445045073812	48.5351523563297	39.661987345588	175.681444341925	289.299201814877	297.619622098343	317.348580417225	39.447214736433	254.200089418382	296.238487305911	39.661987345588	289.299201814877	0.124302477372266	-3.00807304502097	0.801012215287616	-0.32010385125401	0.155181750040645	-2.68796919376696	6
GOF down	ENSMUSG00000080712.3	Hist3h2bb-ps	chr11	58954048	58954512	-	29.1863551458482	59.3829182239793	70.1240863670998	10.8520216226572	7.66344510889417	11.6652903957612	39.0403209648722	32.6628131081313	36.3504881952175	52.8977865789758	10.0602523757709	36.017874089407	59.3829182239793	10.8520216226572	36.3504881952175	0.19018286069023	-2.39454085873814	0.680895674824366	-0.554494325935303	0.279312775395859	-1.84004653280283	6
GOF down	ENSMUSG00000056895.4	Hist3h2ba	chr11	58948920	58949533	+	376.503981381442	898.324571430835	916.621986084233	244.773376599936	228.626112415343	136.483897630406	556.324573749428	575.098816511025	661.124504050518	730.483512965503	203.294462215228	597.515964770324	898.324571430835	228.626112415343	575.098816511025	0.278301232823072	-1.84528079533105	0.817973238498732	-0.289874451374049	0.340232686993345	-1.555406343957	6
GOF down	ENSMUSG00000111997.1	RP23-231M6.4	chr10	111500739	111501965	+	43.7795327187723	50.5386538076419	47.2264255125366	13.2635819832477	19.1586127722354	18.6644646332179	40.434618142189	36.1624002268596	56.7976378050273	47.1815373463169	17.0288864629003	44.4648853913586	47.2264255125366	18.6644646332179	40.434618142189	0.3609226706181	-1.47023832887283	0.942421292146167	-0.0855559605081701	0.382973807601666	-1.38468236836466	6
GOF down	ENSMUSG00000032611.9	RP23-448A11.15	chr9	108392805	108410934	+	135.424687876736	125.083168173914	136.670413225674	67.523690096534	63.8620425741181	65.3256262162625	114.332368539983	123.652078195068	139.722189000367	132.392756425441	65.5704529623049	125.902211911806	135.424687876736	65.3256262162625	123.652078195068	0.49527220924078	-1.01370642427917	0.950975078328469	-0.0725205612074564	0.520804614681724	-0.941185863071712	6
GOF down	ENSMUSG00000094103.2	RP24-491I24.3	chr12	55199592	55217168	+	1331.4815217536	1161.75730440317	940.950750742206	696.940944210654	507.064618038498	641.590971766864	1104.28336443496	1165.36251053654	1095.05845688093	1144.72985896633	615.198844672005	1121.56811061748	1161.75730440317	641.590971766864	1104.28336443496	0.537418361068629	-0.895882482560955	0.979766625140919	-0.0294899465241669	0.548516705181025	-0.866392536036788	6
GOF down	ENSMUSG00000095595.2	Fam177a	chr12	55124469	55142104	+	1382.84950681029	1193.97569620554	965.27951540018	776.522436110141	538.995639325557	624.093036173222	1122.40922774007	1177.0278009323	1129.13703956394	1180.70157280534	646.537037202973	1142.85802274544	1193.97569620554	624.093036173222	1129.13703956394	0.547587173672351	-0.868839440650954	0.967948251335022	-0.0469981750093719	0.565719472003903	-0.821841265641582	6
GOF down	ENSMUSG00000056962.11	Jmjd6	chr11	116837432	116843449	-	2489.01236683794	1818.12807072992	2578.13350184347	1622.98012267741	1448.391125581	1392.83567325388	2502.76343328377	2554.6985966717	2365.05363820134	2295.09131313711	1488.06897383743	2474.1718893856	2489.01236683794	1448.391125581	2502.76343328377	0.648370269766487	-0.625110155549197	1.07802764762493	0.108394178628348	0.601441225737535	-0.733504334177545	6
GOF down	ENSMUSG00000050503.8	Fbxl22	chr9	66508459	66514593	-	326.303450530583	303.863656018447	253.305373203605	180.867027044287	164.764069841225	164.480594580232	246.790600385085	286.966143735725	310.115102415449	294.490826584212	170.037230488581	281.290615512086	303.863656018447	164.764069841225	286.966143735725	0.577393980182123	-0.79237202854428	0.955176155314466	-0.0661612727726582	0.604489524753716	-0.726210755771621	6
GOF down	ENSMUSG00000097180.5	RP23-354E8.2	chr5	23850597	23855038	+	347.901353338511	421.366026121215	405.002376365086	264.06585948466	247.784725187578	281.133498537844	384.826020939454	430.449215603587	460.060866220721	391.423251941604	264.328027736694	425.112034254587	405.002376365086	264.06585948466	430.449215603587	0.675299759085668	-0.566400052057943	1.08606740183644	0.119113640230419	0.621784391966649	-0.685513692288362	6
GOF down	ENSMUSG00000032936.13	Camkv	chr9	107935674	107949691	+	890.767559051288	688.589158129121	728.431835935792	467.842709954557	532.609435068145	454.946325434685	716.668749140867	694.084778547789	834.925275733902	769.262851038734	485.132823485796	748.559601140853	728.431835935792	467.842709954557	716.668749140867	0.630646368573137	-0.665096846129691	0.973086897580034	-0.0393594500968746	0.648088439112159	-0.625737396032817	6
GOF down	ENSMUSG00000048546.8	Tob2	chr15	81848272	81858796	-	3721.26028109565	3063.2741539157	2962.38487305911	2087.20549209108	2426.75761781649	2365.72089226036	3385.35354652534	3162.46022629085	3763.41148096111	3248.97310269015	2293.22800072264	3437.07508459243	3063.2741539157	2365.72089226036	3385.35354652534	0.705831636101834	-0.502604000241006	1.05789582614474	0.0811975683745107	0.667203347114127	-0.583801568615517	6
GOF down	ENSMUSG00000001034.17	Mapk7	chr11	61488812	61494406	-	1296.45789557858	1521.21347961002	1592.81853319555	985.122407301219	1026.90164459182	965.886044769025	1305.06215796858	1533.98568704259	1532.40026797964	1470.16330279472	992.636698887355	1457.14937099694	1521.21347961002	985.122407301219	1532.40026797964	0.675188053599485	-0.566638716857152	0.991147968546731	-0.0128276413574877	0.681218218697939	-0.553811075499664	6
GOF down	ENSMUSG00000039989.7	Cbx4	chr11	119077573	119086221	-	3613.85449415893	3368.40127627933	3541.98191344024	2539.3730597018	2800.98918730082	2866.16185023852	3460.64559410045	4100.34957411005	4197.34543379152	3508.0792279595	2735.50803241371	3919.44686733401	3541.98191344024	2800.98918730082	4100.34957411005	0.779773732192714	-0.358872538604747	1.11726292727254	0.15996873750901	0.697932163645937	-0.518841276113757	6
GOF down	ENSMUSG00000037573.5	Tob1	chr11	94211454	94215495	+	1548.04427693579	1425.8217705481	1462.58808708522	975.476165858857	975.812010532524	1076.70630352876	1438.914686991	1314.67822760228	1475.60263017461	1478.81804485637	1009.33149330671	1409.73184825596	1462.58808708522	975.812010532524	1438.914686991	0.682525816355416	-0.551044478270946	0.953282828241985	-0.06902378592898	0.715974101426026	-0.482020692341966	6
GOF down	ENSMUSG00000028952.12	Zbtb48	chr4	152019774	152027671	-	1009.26416094343	1034.77893671147	1134.14976420258	813.901621699294	813.602422394264	764.076520922356	962.065052348635	1158.36333629908	1188.20658288117	1059.39762061916	797.193521671971	1102.87832384296	1034.77893671147	813.602422394264	1158.36333629908	0.752496990890026	-0.410242282100361	1.04104285527694	0.0580294594374398	0.722829984448478	-0.4682717415378	6
GOF down	ENSMUSG00000035621.13	Midn	chr10	80148272	80158368	+	5810.41958243547	6136.02430542033	6079.32895688653	4303.42946347375	4549.53191298017	4457.30746022034	5440.5475858904	6335.41921393789	6511.28119796833	6008.59094824744	4436.75627889142	6095.74933259887	6079.32895688653	4457.30746022034	6335.41921393789	0.738402117419145	-0.437521404869926	1.01450562787551	0.0207768683331796	0.727844279154413	-0.458298273203106	6
GOF down	ENSMUSG00000015605.5	Srf	chr17	46546839	46556162	-	3153.87753706036	2982.41230782347	3380.9827355566	2509.22855519441	2394.82659652943	2425.21387327875	3148.32302638148	3470.42389273895	3354.46848876491	3172.42419348014	2443.08967500086	3324.40513596178	3153.87753706036	2425.21387327875	3354.46848876491	0.770101829390224	-0.376878871101766	1.0479068791601	0.0675105194107255	0.734895289558039	-0.444389390512492	6
GOF down	ENSMUSG00000029817.11	Tra2a	chr6	49243924	49264033	-	9299.35647657016	8804.46522646382	10235.9699538915	6301.40722222298	5945.55616365039	6715.7076808397	8782.67791991892	8149.37187047875	8835.44053695005	9446.59721897516	6320.89035557102	8589.16344244924	9299.35647657016	6301.40722222298	8782.67791991892	0.669118224165882	-0.579666956742609	0.909233583622724	-0.137277122091972	0.735914550692098	-0.442389834650637	6
GOF down	ENSMUSG00000029455.14	Aldh2	chr5	121566027	121593824	-	3060.48120059365	2789.10195700924	3212.8280386559	2278.92454075802	2318.19214544049	2208.23947191759	3180.39186145976	2918.65565701944	3084.11173281298	3020.80373208626	2268.45205270537	3061.05308376406	3060.48120059365	2278.92454075802	3084.11173281298	0.750943210447738	-0.413224285820644	1.01332405387688	0.0190956116117456	0.74106916496722	-0.43231989743239	6
GOF down	ENSMUSG00000024807.17	Syvn1	chr19	6046576	6053712	+	2497.18454627877	2457.44204139659	2572.40908662983	1799.02402900051	1867.32612486721	1831.4505921345	2154.18913895455	2611.85851961093	2410.49174844536	2509.01189143506	1832.60024866741	2392.17980233695	2497.18454627877	1831.4505921345	2410.49174844536	0.730407159457194	-0.453227188186849	0.953435019779323	-0.0687934781496969	0.766079642875138	-0.384433710037153	6
GOF down	ENSMUSG00000034781.5	Gna11	chr10	81528724	81545190	-	1695.14350687087	1631.13505164164	1582.80080657168	1311.88883616123	1295.12222340311	1229.52160771323	1564.40143294952	1693.80016546452	1739.14366958994	1636.3597883614	1278.84422242586	1665.78175600133	1631.13505164164	1295.12222340311	1693.80016546452	0.78151775148817	-0.355649451741635	1.01798013361682	0.0257094067847678	0.767714148518288	-0.381358858526403	6
GOF down	ENSMUSG00000011158.8	Brf1	chr12	112960085	113000704	-	4164.30915220963	4189.65440065352	4543.03902392568	3517.26078592124	3456.21374411127	3304.77676911914	4079.71354082914	4485.30415717017	4778.953244915	4299.00085892961	3426.08376638388	4447.99031430477	4189.65440065352	3456.21374411127	4485.30415717017	0.796948844350064	-0.327440973395678	1.03465676334204	0.0491522479646121	0.770254322579249	-0.37659322136029	6
GOF down	ENSMUSG00000071054.12	Safb	chr17	56584825	56606294	+	8305.85294740549	8757.08523851916	9024.54058430472	6510.00719341405	6507.54213830263	6567.55849281354	7729.98355104469	9016.10294688381	8538.95686760781	8695.82625674312	6528.36927484341	8428.3477885121	8757.08523851916	6510.00719341405	8538.95686760781	0.750747436999563	-0.413600450358792	0.969240591942185	-0.0450732685469418	0.774572839025653	-0.36852718181185	6
GOF down	ENSMUSG00000031508.14	Ankrd10	chr8	11611583	11635757	-	7850.54580713026	7623.12419371019	8360.50841952239	6132.59799698164	6300.62912036249	6152.27415472444	7318.66588373621	7734.08753238965	8124.33411163111	7944.72614012095	6195.16709068952	7725.69584258566	7850.54580713026	6152.27415472444	7734.08753238965	0.779783592464423	-0.358854295780489	0.972430730314392	-0.0403326094067216	0.801891145719258	-0.318521686373767	6
