# Supplementary material for: Oncogenic and teratogenic effects of Trp53Y217C, an inflammation-prone mouse model of the human hotspot mutant TP53Y220C
Source: eLife. 2025 Apr 14;13:RP102434. doi: 10.7554/eLife.102434 (PMC11996178; doi:10.7554/eLife.102434)
Supplement: Supplementary file 2. — As shown in Figure 5B, 107 genes (in bold) were less expressed and 85 genes were more expressed in Trp53YC/YC cells compared to Trp53-/- cells. [file elife-102434-supp2.xlsx]

## Sheet: Feuil1
id	gene_name	chromosome	start	end	strand	KO_1	KO_2	KO_3	YC_1	YC_2	YC_3	Mean_KO	Mean_YC	Median_KO	Median_YC	FoldChange	log2FoldChange	FoldChangeMedian	log2FoldChangeMedian	pvalue	padj
ENSMUSG00000031508.14	Ankrd10	chr8	11611583	11635757	-	7318.66588373621	7734.08753238965	8124.33411163111	6132.59799698164	6300.62912036249	6152.27415472444	7725.69584258566	6195.16709068952	7734.08753238965	6152.27415472444	0.801791056928265	-0.318701768939208	0.801021072588683	-0.320087898546383	0.000213084463341784	0.0466399321340328
ENSMUSG00000071054.12	Safb	chr17	56584825	56606294	+	7729.98355104469	9016.10294688381	8538.95686760781	6510.00719341405	6507.54213830263	6567.55849281354	8428.3477885121	6528.36927484341	8538.95686760781	6510.00719341405	0.774480360527485	-0.368699439641205	0.764539436849543	-0.387337173576186	6.96657228503819e-05	0.0218980716091882
ENSMUSG00000040459.11	Arglu1	chr8	8665075	8690521	-	6692.62645112094	7465.78585328715	7983.47596987464	5520.06166539165	5670.94938058169	5918.96834680922	7380.62942476091	5703.32646426085	7465.78585328715	5670.94938058169	0.772641487917999	-0.372128947984684	0.763928483395985	-0.38849051091867	0.000231445005015256	0.0484164867670269
ENSMUSG00000011158.8	Brf1	chr12	112960085	113000704	-	4079.71354082914	4485.30415717017	4778.953244915	3517.26078592124	3456.21374411127	3304.77676911914	4447.99031430477	3426.08376638388	4485.30415717017	3456.21374411127	0.770058592542506	-0.376959872515533	0.763846474247899	-0.388645395236903	0.000133559242926804	0.0351739095375543
ENSMUSG00000032120.11	C2cd2l	chr9	44309237	44320285	-	1521.1782204527	1575.98073246733	1494.91382702832	1100.87730460956	1277.24085148236	1147.8645749429	1530.69092664945	1175.32757701161	1521.1782204527	1147.8645749429	0.767622283269502	-0.381531502822816	0.772642916660899	-0.372126280203543	0.000178057623611957	0.0419270763186219
ENSMUSG00000034781.5	Gna11	chr10	81528724	81545190	-	1564.40143294952	1693.80016546452	1739.14366958994	1311.88883616123	1295.12222340311	1229.52160771323	1665.78175600133	1278.84422242586	1693.80016546452	1295.12222340311	0.767283137461581	-0.382169045666278	0.755014817273406	-0.405423137076003	6.31120308138907e-05	0.0208702898901473
ENSMUSG00000024807.17	Syvn1	chr19	6046576	6053712	+	2154.18913895455	2611.85851961093	2410.49174844536	1799.02402900051	1867.32612486721	1831.4505921345	2392.17980233695	1832.60024866741	2410.49174844536	1831.4505921345	0.765729289027184	-0.385093653659737	0.760259913708205	-0.395435370919138	0.000167003852003395	0.0404304915499151
ENSMUSG00000097415.2	RP23-285C18.2	chr7	75769038	75782099	-	5054.32726777363	5563.1769897385	5942.16886716196	4349.24911032497	4064.18038941688	4035.02394789379	5519.89104155803	4149.48448254521	5563.1769897385	4064.18038941688	0.75159396591478	-0.411974610593162	0.745883959866655	-0.422976892753506	2.50884561298246e-05	0.0116413423163354
ENSMUSG00000036281.13	Snapc4	chr2	26362765	26380653	-	1034.56850556911	1031.21167098529	1100.73822066143	797.02069917516	809.770699839817	753.577759566171	1055.50613240528	786.78971952705	1034.56850556911	797.02069917516	0.745121985073199	-0.424451464139668	0.760500358643956	-0.394979166577649	0.000114239743943324	0.0311379195781744
ENSMUSG00000047777.9	Phf13	chr4	151989633	151996258	-	745.948989864522	825.902560019891	848.556708807109	593.243848705263	604.134922751157	604.262042500428	806.802752897173	600.546937985616	825.902560019891	604.134922751157	0.743747707227377	-0.427114779010399	0.727140182216111	-0.459694572981496	0.000244480824733582	0.0498143440045793
ENSMUSG00000029455.14	Aldh2	chr5	121566027	121593824	-	3180.39186145976	2918.65565701944	3084.11173281298	2278.92454075802	2318.19214544049	2208.23947191759	3061.05308376406	2268.45205270537	3084.11173281298	2278.92454075802	0.741132025683202	-0.432197526942014	0.73552849223019	-0.443146866523459	7.28095705393724e-06	0.00457725585631148
ENSMUSG00000115018.2	RP23-132N23.23	chr2	25244819	25246863	-	1264.62753982639	1476.82576410336	1528.99240971134	1014.06113162831	1149.51676633413	983.383980362666	1423.48190454703	1048.98729277503	1476.82576410336	1014.06113162831	0.736221508762327	-0.441788196114234	0.710298613602473	-0.493502425490343	0.000178021845146512	0.0419270763186219
ENSMUSG00000029817.11	Tra2a	chr6	49243924	49264033	-	8782.67791991892	8149.37187047875	8835.44053695005	6301.40722222298	5945.55616365039	6715.7076808397	8589.16344244924	6320.89035557102	8782.67791991892	6301.40722222298	0.735966335374856	-0.442288318956334	0.719699664863649	-0.474533108342089	1.19506465975776e-05	0.00675072974541715
ENSMUSG00000015605.5	Srf	chr17	46546839	46556162	-	3148.32302638148	3470.42389273895	3354.46848876491	2509.22855519441	2394.82659652943	2425.21387327875	3324.40513596178	2443.08967500086	3354.46848876491	2425.21387327875	0.734770005768623	-0.444635359853546	0.72830902516553	-0.457377371830581	2.41639587259509e-06	0.00245532556642763
ENSMUSG00000040249.15	Lrp1	chr10	127538161	127621148	-	1104.28336443496	1021.87943866868	1058.70796868571	692.117823489473	807.216218136853	822.402972901162	1061.62359059645	773.912338175829	1058.70796868571	807.216218136853	0.729167800789688	-0.455677239855204	0.730996989789895	-0.452062629645534	0.000223057712041928	0.0479506800579373
ENSMUSG00000035621.13	Midn	chr10	80148272	80158368	+	5440.5475858904	6335.41921393789	6511.28119796833	4303.42946347375	4549.53191298017	4457.30746022034	6095.74933259887	4436.75627889142	6335.41921393789	4457.30746022034	0.727685032462007	-0.458613958242899	0.70030981835118	-0.513934780667881	4.56805267905152e-06	0.00335941489191304
ENSMUSG00000063849.6	Ppcdc	chr9	57385095	57440124	-	1804.22054744802	2121.91632298896	2152.63047281054	1579.57203618678	1493.09455538288	1352.00715686872	2026.2557810825	1474.89124947946	2121.91632298896	1493.09455538288	0.727515226694873	-0.458950651337514	0.695075123132993	-0.524759183361408	0.000137342948295263	0.0355628971921644
ENSMUSG00000029119.9	Man2b2	chr5	36806921	36830653	-	762.680555992324	832.901734257347	814.478126124092	575.157146000834	593.916995939298	577.431874590178	803.353472124588	582.16867217677	814.478126124092	577.431874590178	0.724285339009739	-0.465369922336384	0.714775085424543	-0.484438746966959	0.000193179792387279	0.0437765626039475
ENSMUSG00000024134.11	Six2	chr17	85684277	85688274	-	433.626422145544	442.114505999348	428.254189049906	332.795329761489	291.210914137978	317.295898764704	434.665039064933	313.767380888057	433.626422145544	317.295898764704	0.722211280496615	-0.469507140414397	0.723589165382415	-0.466757288871387	0.000190081074871726	0.0433262576331887
ENSMUSG00000028952.12	Zbtb48	chr4	152019774	152027671	-	962.065052348635	1158.36333629908	1188.20658288117	813.901621699294	813.602422394264	764.076520922356	1102.87832384296	797.193521671971	1158.36333629908	813.602422394264	0.722103482666594	-0.469722494295761	0.688206797203172	-0.539085953694651	0.000126702626535067	0.0338252621538173
ENSMUSG00000037573.5	Tob1	chr11	94211454	94215495	+	1438.914686991	1314.67822760228	1475.60263017461	975.476165858857	975.812010532524	1076.70630352876	1409.73184825597	1009.33149330671	1438.914686991	975.812010532524	0.716192092395289	-0.481581505194412	0.701453326199195	-0.511580982918366	4.04282890221873e-06	0.00328286129420373
ENSMUSG00000029602.11	Rasal1	chr5	120648812	120679597	+	665.079753580143	765.243049961932	741.777149733657	529.337499149615	507.064618038498	514.439306453067	724.033317758578	516.947141213727	741.777149733657	514.439306453067	0.713513518667557	-0.486987330736595	0.696903566521754	-0.520969056764955	0.000232287837068888	0.0484164867670269
ENSMUSG00000023007.15	Prpf40b	chr15	99295087	99317018	+	426.65493625896	440.947976959772	441.885622123113	315.914407237355	316.755731167626	299.797963171062	436.496178447282	310.822700525348	440.947976959772	315.914407237355	0.711643713102925	-0.490772963231304	0.704896533755284	-0.504516583748584	0.000105726838067596	0.029646870268782
ENSMUSG00000078517.12	Emc1	chr4	139352587	139378730	+	2099.8115490392	2063.58987101015	2065.16211059079	1506.01944518877	1522.47109496698	1401.00137653092	2076.18784354671	1476.49730556222	2065.16211059079	1506.01944518877	0.711120679704802	-0.491833683794031	0.714954674981826	-0.484076310690924	1.88513954221138e-05	0.00954247843334716
ENSMUSG00000012017.4	Scarf2	chr16	17797282	17808293	+	789.172202361344	740.745940130834	761.088346587366	588.420727984082	485.351523563297	545.935590521623	763.668829693182	539.902614023001	761.088346587366	545.935590521623	0.707538132609794	-0.499120191120167	0.709382316052878	-0.495364728613148	2.74418216523979e-05	0.0118844431393946
ENSMUSG00000022389.15	Tef	chr15	81802421	81826863	+	1907.39853856947	1820.95183077832	1915.21634678552	1588.01249744884	1236.36914423493	1157.19680725951	1881.18890537777	1327.19281631443	1907.39853856947	1236.36914423493	0.705530779345236	-0.503219071965442	0.695813061338409	-0.523228334366912	0.000165418612282606	0.0402970078183695
ENSMUSG00000000538.18	Tom1l2	chr11	60226714	60352905	-	2201.59524298333	2404.21635056638	2601.33181147025	1724.26565782221	1788.13719207531	1550.31709359666	2402.38113500665	1687.57331449806	2404.21635056638	1724.26565782221	0.702105927604554	-0.51023938672072	0.701922401492904	-0.510616547504689	4.42160726669712e-06	0.00331424973911642
ENSMUSG00000023009.14	Nckap5l	chr15	99422035	99457748	-	1662.0022353617	2121.91632298896	2032.21948066388	1239.54202534352	1442.00492132359	1384.66996997685	1938.71267967151	1355.40563888132	2032.21948066388	1384.66996997685	0.698703645649667	-0.517247426999029	0.666958294503968	-0.58433154366259	3.35823663880929e-05	0.0134942257186464
ENSMUSG00000039989.7	Cbx4	chr11	119077573	119086221	-	3460.64559410045	4100.34957411005	4197.34543379152	2539.3730597018	2800.98918730082	2866.16185023852	3919.44686733401	2735.50803241371	4100.34957411005	2800.98918730082	0.697741355957203	-0.51923574846585	0.667140199383471	-0.583938119533259	3.09798975592623e-06	0.00280814759806364
ENSMUSG00000020261.15	Slc36a1	chr11	55204350	55236330	+	2099.8115490392	1953.93614129	2335.51886654272	1368.56050463511	1549.2931528481	1539.81833224047	2129.7555189573	1485.89066324123	2099.8115490392	1539.81833224047	0.697616442279745	-0.519494051166012	0.707630484231369	-0.498931895216671	0.000226362345246183	0.0479506800579373
ENSMUSG00000002799.6	Jag2	chr12	112907819	112929776	-	1325.97661562834	1418.49931212456	1477.87453568681	1065.909679381	943.880989245465	921.557941265132	1407.4501544799	977.116203297199	1418.49931212456	943.880989245465	0.6940471792962	-0.526894358563413	0.688837981763785	-0.537763401351893	4.80082837692304e-05	0.0174064042879217
ENSMUSG00000032263.14	Bckdhb	chr9	83925145	84124240	+	464.300960046515	475.943848147056	527.082078830654	361.734054088575	307.815045207249	341.793008595802	489.108962341408	337.114035963875	475.943848147056	341.793008595802	0.68908293410944	-0.537250466924406	0.708306320748397	-0.497554678292606	0.000172187112204169	0.0413811759080591
ENSMUSG00000028763.17	Hspg2	chr4	137468769	137570630	+	790.566499538661	843.400495613532	706.56261429454	504.016115363414	540.272880177039	552.934764759079	780.176536482245	532.407920099844	790.566499538661	540.272880177039	0.682586165391713	-0.550916920595664	0.673451152319929	-0.570354788934798	1.85003212632841e-05	0.00948798712998715
ENSMUSG00000001034.17	Mapk7	chr11	61488812	61494406	-	1305.06215796858	1533.98568704259	1532.40026797964	985.122407301219	1026.90164459182	965.886044769025	1457.14937099694	992.636698887354	1532.40026797964	985.122407301219	0.680793591044309	-0.554710639256133	0.647765939245152	-0.626455484386254	9.16494065508749e-06	0.00533167002855739
ENSMUSG00000004100.12	Ppan	chr9	20888175	20892178	+	1829.31789663972	2219.90476231335	1907.26467749282	1372.17784517599	1440.7276804721	1224.85549155492	1985.4957788153	1345.92033906767	1907.26467749282	1372.17784517599	0.677652594245444	-0.561382244844627	0.705680944522571	-0.502912041413174	9.5225825657635e-05	0.0279068947868995
ENSMUSG00000028565.18	Nfia	chr4	97772734	98118874	+	633.010918501856	695.251307587366	826.973606441198	469.048490134852	468.747392494027	521.438480690524	718.411944176806	486.411454439801	695.251307587366	469.048490134852	0.6766092835176	-0.563605122909287	0.699619618304246	-0.515357349891073	0.000226221300389342	0.0479506800579373
ENSMUSG00000048546.8	Tob2	chr15	81848272	81858796	-	3385.35354652534	3162.46022629085	3763.41148096111	2087.20549209108	2426.75761781649	2365.72089226036	3437.07508459244	2293.22800072264	3385.35354652534	2365.72089226036	0.66714772894974	-0.583921836888884	0.677396900857331	-0.561926708480428	8.86905997500095e-06	0.00531829770224018
ENSMUSG00000047507.12	Baiap3	chr17	25242659	25256364	-	1314.8222382098	1592.3121390214	1385.86236244267	821.136302781065	1044.78301651257	954.220754373263	1430.99891322462	940.0466912223	1385.86236244267	954.220754373263	0.656680798968939	-0.6067358227405	0.678311726112114	-0.559979661699985	0.00016117662547536	0.039760641336412
ENSMUSG00000026185.8	Igfbp5	chr1	72857932	72874884	-	6385.88107211123	4404.81365343942	5645.68519781972	3626.98678232811	3286.34071086412	3737.55904280188	5478.79330779012	3550.29551199804	5645.68519781972	3626.98678232811	0.648117199893759	-0.625673373726872	0.628851129242755	-0.669209573050751	5.22169818973956e-05	0.0182664386368545
ENSMUSG00000032936.13	Camkv	chr9	107935674	107949691	+	716.668749140867	694.084778547789	834.925275733902	467.842709954557	532.609435068145	454.946325434685	748.559601140853	485.132823485796	716.668749140867	467.842709954557	0.647600076440623	-0.626824938955806	0.676927554141808	-0.562926652332215	3.1866794061925e-05	0.0131982665105373
ENSMUSG00000023328.14	Ache	chr5	137287519	137294466	+	1593.68167367317	1673.96917179173	1942.47921293194	1017.67847216919	1171.22986080933	1166.52903957612	1736.71001946561	1118.47912418488	1673.96917179173	1166.52903957612	0.643832408273662	-0.635242896016897	0.668159929724224	-0.581734629606808	2.5525181258345e-05	0.0117046469400766
ENSMUSG00000025207.15	Sema4g	chr19	44989101	45003397	+	273.282246754105	311.463253566823	368.048692976577	226.686673895507	205.63577708866	181.978530173874	317.598064432502	204.766993719347	311.463253566823	205.63577708866	0.643303629207328	-0.636428267193569	0.657435480347653	-0.605078777288201	0.000209735613383242	0.046185677982139
ENSMUSG00000040488.17	Ltbp4	chr7	27305136	27337692	-	574.450437054547	766.409579001509	696.339039489635	415.994162201861	459.80670653365	423.45004136613	679.066351848564	433.083636700547	696.339039489635	423.45004136613	0.637047140688179	-0.650527960834853	0.621943639721773	-0.685144245042675	7.52877456649901e-05	0.023106224116412
ENSMUSG00000024140.9	Epas1	chr17	86753907	86833410	+	380.643129407504	480.60996430536	428.254189049906	219.451992813735	288.656432435014	311.463253566823	429.835760920923	273.190559605191	428.254189049906	288.656432435014	0.635019026759623	-0.655128275600173	0.637916841423716	-0.648559727770341	0.000160526042897138	0.039760641336412
ENSMUSG00000054672.13	RP23-284K1.6	chr7	140247284	140300736	+	1274.38762006761	1172.361684774	1418.80499236958	864.544389271694	699.927986612334	883.06248295912	1288.5180990704	815.844952947716	1274.38762006761	864.544389271694	0.633332382990188	-0.658965246990783	0.640185874455084	-0.643437250366296	4.01219068239205e-06	0.00328286129420373
ENSMUSG00000093645.1	Gm23187	chr2	130277195	130277280	+	464.300960046515	528.437654927981	597.511149708888	335.206890122079	351.24123415765	314.962840685551	530.083254894461	333.803654988427	528.437654927981	335.206890122079	0.628769702942358	-0.669396391393671	0.631680297335965	-0.662733520894451	1.8249205901931e-05	0.00948399064586087
ENSMUSG00000016756.17	Cmah	chr13	24327404	24477377	+	3919.3693654377	3632.57142924003	4205.29710308422	2083.58815155019	2452.30243484613	2847.4973856053	3919.07929925398	2461.12932400054	3919.3693654377	2452.30243484613	0.628006322061631	-0.671149012265598	0.627940133865309	-0.671301071905141	0.000108347287478529	0.0299507249932667
ENSMUSG00000097636.7	Mirt1	chr19	53441212	53464796	-	1699.64825914926	2197.7407105614	2738.78209495842	1343.23912084891	1522.47109496698	1300.67987912737	2212.05702155636	1388.79669831442	2197.7407105614	1343.23912084891	0.627486663507979	-0.672343298286689	0.631920176770835	-0.662185764095769	7.21728581187699e-05	0.0223260435785341
ENSMUSG00000055897.13	Ppp4r1l-ps	chr2	173579320	173659640	-	649.742484629658	621.75997809407	862.188141880315	429.257744185109	427.875685246591	471.277731988751	711.230201534681	442.803720473484	649.742484629658	429.257744185109	0.622361685481644	-0.684174848617046	0.681506490568913	-0.553200697773249	0.000195114340986183	0.043959373807043
ENSMUSG00000097180.5	RP23-354E8.2	chr5	23850597	23855038	+	384.826020939454	430.449215603587	460.060866220721	264.06585948466	247.784725187578	281.133498537844	425.112034254588	264.328027736694	430.449215603587	264.06585948466	0.621338760138877	-0.68654804009926	0.614074827308133	-0.703513630808418	3.79250284454723e-06	0.00321348659504168
ENSMUSG00000018537.16	Pcgf2	chr11	97688823	97700497	-	262.12786933557	249.637214469289	268.084850439729	161.574544159563	169.873033247154	145.816129947015	259.949978081529	159.087902451244	262.12786933557	161.574544159563	0.611497282917849	-0.709582006485728	0.60690953180405	-0.720446615877448	6.50147009389022e-06	0.00422143628208605
ENSMUSG00000050503.8	Fbxl22	chr9	66508459	66514593	-	246.790600385085	286.966143735725	310.115102415449	180.867027044287	164.764069841225	164.480594580232	281.290615512086	170.037230488582	286.966143735725	164.764069841225	0.603452805598095	-0.728687148748775	0.592534116655845	-0.755029871655891	2.59378197667446e-05	0.0117278214315602
ENSMUSG00000056962.11	Jmjd6	chr11	116837432	116843449	-	2502.76343328377	2554.6985966717	2365.05363820134	1622.98012267741	1448.391125581	1392.83567325388	2474.1718893856	1488.06897383743	2502.76343328377	1448.391125581	0.601456541873664	-0.733467595371913	0.594570367317936	-0.75008053206019	8.25744188557663e-07	0.00123788581682354
ENSMUSG00000078651.8	Aoc2	chr11	101325063	101329702	+	412.711964485791	635.758326568984	585.015669391782	349.676252285622	344.855029900238	282.30002757742	544.495320148852	325.61043658776	585.015669391782	344.855029900238	0.596862717838436	-0.74452895413269	0.556584128637588	-0.845328325029036	4.07391886374782e-05	0.0155675623090489
ENSMUSG00000105708.1	RP23-148G12.3	chr3	94356507	94360842	-	352.757185861166	463.112028711718	541.849464659961	273.712100927022	261.834374553884	271.801266221235	452.572893077615	269.115913900714	463.112028711718	271.801266221235	0.5938516156612	-0.751825601727504	0.581103269222652	-0.783133523759645	0.000230704680538415	0.0484164867670269
ENSMUSG00000043557.15	Mdga1	chr17	29827956	29970087	-	391.797506826038	356.957886110292	493.003496147637	225.480893715212	241.398520930166	268.301679102507	413.919629694656	245.060364582628	391.797506826038	241.398520930166	0.591859528289753	-0.756673287085877	0.625477090367084	-0.676971051773785	0.000101564336678401	0.0291078908140739
ENSMUSG00000032531.15	Amotl2	chr9	102716672	102733418	+	290.013812881907	377.955408822662	363.504881952175	188.101708126059	177.536478356048	240.30498215268	343.824701218915	201.981056211596	363.504881952175	188.101708126059	0.587223678470114	-0.768017952110407	0.555648813096738	-0.847754750932994	0.000181429910616279	0.041993559054898
ENSMUSG00000024940.10	Ltbp3	chr19	5740904	5758532	+	532.621521735041	544.769061482046	703.154756026238	399.113239677728	338.468825642826	306.797137408519	593.515113081109	348.126400909691	544.769061482046	338.468825642826	0.586022584510639	-0.770971829670474	0.639034823237964	-0.646033544084676	7.83639179057776e-06	0.00484823877494205
ENSMUSG00000052911.9	Lamb2	chr9	108479736	108490530	+	267.705058044838	254.303330627593	224.918645707908	122.989578390115	158.377865583813	146.982658986591	248.97567812678	142.783367653506	254.303330627593	146.982658986591	0.573855487720958	-0.80124062174504	0.561468728314065	-0.832722422684596	6.5960127730812e-06	0.00422143628208605
ENSMUSG00000029603.15	Dtx1	chr5	120680202	120711927	-	744.554692687205	894.727773354881	719.058094611646	497.987214461938	385.726737147673	460.778970632566	786.113520217911	448.164307414059	744.554692687205	460.778970632566	0.570204475978998	-0.810448730730124	0.601922614706207	-0.732350073942116	2.88728272274757e-06	0.00270652745269096
ENSMUSG00000095595.2	Fam177a	chr12	55124469	55142104	+	1122.40922774007	1177.0278009323	1129.13703956394	776.522436110141	538.995639325557	624.093036173222	1142.85802274544	646.537037202973	1129.13703956394	624.093036173222	0.565829967938217	-0.821559506963874	0.572593949670324	-0.804415668746282	2.01079570013735e-06	0.00217707733345148
ENSMUSG00000094103.2	RP24-491I24.3	chr12	55199592	55217168	+	1104.28336443496	1165.36251053654	1095.05845688093	696.940944210654	507.064618038498	641.590971766864	1121.56811061747	615.198844672005	1104.28336443496	641.590971766864	0.548701903544395	-0.865905514105465	0.557102338480658	-0.84398572305484	1.75430150480725e-07	0.000355267081391153
ENSMUSG00000074415.13	RP23-442M18.1	chr9	41327260	41655483	+	327.659836669463	383.788054020542	565.704472538072	239.950255878755	219.685426454966	234.472336954799	425.717454409359	231.36933976284	383.788054020542	234.472336954799	0.542691102986693	-0.881796837915531	0.602857064827912	-0.7301121098566	2.01622410529221e-05	0.0100751752502531
ENSMUSG00000116417.1	CT025619.1	chr9	41580741	41592827	+	308.139676187027	366.290118426901	524.810173318453	220.657772994031	205.63577708866	222.807046559038	399.74665597746	216.366865547243	366.290118426901	220.657772994031	0.540440239876753	-0.887792996631409	0.590698068723419	-0.759507199784197	1.64646251495938e-05	0.00879098211583174
ENSMUSG00000090248.1	RP23-24M22.5	chr2	129016952	129021756	+	149.189797972904	181.978530173874	205.607448854199	94.0508540630295	112.397194930448	82.8235618099043	178.925259000326	96.4238702677939	181.978530173874	94.0508540630295	0.536782953578138	-0.897589237765757	0.529863990964562	-0.916306008310134	5.24884195122175e-05	0.0182664386368545
ENSMUSG00000027875.12	Hmgcs2	chr3	98280435	98310738	+	1072.21452935667	949.554638214959	717.922141855546	489.546753199871	523.668749107768	451.446738315957	913.230436475724	488.220746874532	949.554638214959	489.546753199871	0.534905239975724	-0.902644758374799	0.514157613712808	-0.959717413161604	1.6237939091528e-07	0.000351614528872494
ENSMUSG00000102715.1	RP24-295G1.1	chr3	50516399	50607223	-	104.572288298765	123.652078195068	140.858141756468	59.0832288344672	75.3572102374593	59.4929810183819	123.0275027501	64.6444733634362	123.652078195068	59.4929810183819	0.523340994152108	-0.934176822857065	0.522793262410487	-0.935687546618618	0.000209137837903548	0.046185677982139
ENSMUSG00000032611.9	RP23-448A11.15	chr9	108392805	108410934	+	114.332368539983	123.652078195068	139.722189000367	67.523690096534	63.8620425741181	65.3256262162625	125.902211911806	65.5704529623049	123.652078195068	65.3256262162625	0.51971982658459	-0.944193998033436	0.530281851461193	-0.915168720828796	6.28194222315527e-06	0.00422143628208605
ENSMUSG00000061882.12	Ccdc62	chr5	123930679	123969895	+	174.287147164608	160.981007461504	199.927685073696	85.6103928009627	109.842713227483	82.8235618099043	178.398613233269	92.75888927945	174.287147164608	85.6103928009627	0.518916229083422	-0.946426438077885	0.532218759607342	-0.909908731623256	3.67302154575233e-05	0.0143163360788788
ENSMUSG00000031523.16	Dlc1	chr8	36567751	36953143	-	270.493652399471	222.807046559038	262.405086659226	96.46241442362	132.833048554166	152.815304184471	251.901928539245	127.370255720752	262.405086659226	132.833048554166	0.506181211816097	-0.982274135686069	0.485395528502701	-1.04276727654395	2.45677443340117e-06	0.00245532556642763
ENSMUSG00000073403.11	RP23-108F2.16	chr17	36141758	36145923	-	1812.58633051192	2673.68455870846	1958.38255151734	1240.74780552381	1007.74303181958	913.392237988099	2148.21781357924	1053.9610251105	1958.38255151734	1007.74303181958	0.490556114201682	-1.0275099206241	0.538179337991905	-0.893841091402204	2.96287447666058e-05	0.0125526041822608
ENSMUSG00000016179.11	Camk1g	chr1	193346346	193370298	-	105.966585476082	93.3223231660893	129.498614195462	54.2601081132862	62.5848017226357	43.1615744643163	109.595840945878	53.3354947667461	105.966585476082	54.2601081132862	0.485085286713671	-1.04368967356353	0.503323708385268	-0.990441539245523	5.57104127282427e-05	0.0190475855869186
ENSMUSG00000044349.15	Snhg11	chr2	158375638	158386145	+	1232.55870474811	1149.03110398247	1945.88707120024	712.616086554493	696.096264057887	684.75254623118	1442.49229331027	697.821632281187	1232.55870474811	696.096264057887	0.483623649196506	-1.0480433007877	0.566156913738073	-0.82072613494368	3.66540522497828e-06	0.00317481109897729
ENSMUSG00000033987.16	Dnah17	chr11	118021723	118130634	-	165.921364100707	201.809523846668	180.616488219987	86.816172981258	77.9116919404241	89.822736047361	182.782458722454	84.8502003230143	180.616488219987	86.816172981258	0.464080630882561	-1.10755260921465	0.469781032502794	-1.08993962944395	3.24694455541425e-06	0.00287627631673594
ENSMUSG00000017309.11	Cd300lg	chr11	102041509	102055620	+	207.750279420213	239.138453113104	253.317464610422	116.960677488639	91.96134130673	106.154142601427	233.402065714579	105.025387132265	239.138453113104	106.154142601427	0.449743593974529	-1.15282536262016	0.439182347150969	-1.18710802822545	4.89380961635982e-08	0.000119216260885535
ENSMUSG00000027233.4	Patl2	chr2	122120108	122186189	-	54.3775899153576	74.6578585328715	74.9728819026361	28.938724327086	34.4855029900238	26.8301679102507	68.0027767836217	30.0847984091201	74.6578585328715	28.938724327086	0.439806559364268	-1.18505897388745	0.402968943930717	-1.31125943768151	0.000155290584512415	0.0387997507214127
ENSMUSG00000035262.5	Amh	chr10	80805243	80807648	+	107.360882653398	165.647123619809	164.713149634579	68.7294702768292	68.9710059800475	51.3272777413491	145.907051969262	63.009251332742	164.713149634579	68.7294702768292	0.42963824444496	-1.21880567368858	0.38253929010847	-1.38632016215764	1.04321692572231e-06	0.00138577615761491
ENSMUSG00000038807.18	Rap1gap2	chr11	74383356	74610915	-	366.700157634335	398.952931535032	330.562252025259	170.01500542163	137.942011960095	160.981007461504	365.405113731542	156.312674947743	366.700157634335	160.981007461504	0.427937839578122	-1.22452684275913	0.426268360385093	-1.23016611912931	3.21685947738678e-05	0.0131982665105373
ENSMUSG00000064791.1	Snord14e	chr9	40804748	40804837	+	342.997105619948	362.790531308172	504.363023708643	236.332915337869	144.328216217507	132.984310511677	403.383553545588	171.215147355684	362.790531308172	144.328216217507	0.424154353772429	-1.23733872420633	0.471939404642966	-1.08332646037038	9.07545181343873e-07	0.00131012550123112
ENSMUSG00000038217.13	Tlcd2	chr11	75461715	75470899	+	342.997105619948	333.627305318769	335.106063049661	151.928302717201	146.882697920472	129.484723392949	337.24349132946	142.765241343541	335.106063049661	146.882697920472	0.423213950267984	-1.24054091154995	0.42603001582333	-1.23097301618752	7.43624558946755e-10	4.75498727795204e-06
ENSMUSG00000038224.12	Serpinf2	chr11	75431732	75439591	-	54.3775899153576	65.3256262162625	69.2931181221334	22.9098234256097	28.099298732612	27.9966969498268	62.9987780845845	26.3352730360162	65.3256262162625	27.9966969498268	0.416569291636486	-1.26337160317241	0.403138470480673	-1.31065263240431	4.45856971392316e-05	0.0163944973339229
ENSMUSG00000021846.9	Peli2	chr14	48120823	48281575	+	188.230118937776	386.121112099695	398.719417391292	125.401138750706	118.78339918786	136.483897630406	324.356882809588	126.88947852299	386.121112099695	125.401138750706	0.39048990922765	-1.35664282717395	0.328626108613889	-1.60548099113172	2.99363933826539e-07	0.000555633716607477
ENSMUSG00000111997.1	RP23-231M6.4	chr10	111500739	111501965	+	40.434618142189	36.1624002268596	56.7976378050273	13.2635819832477	19.1586127722354	18.6644646332179	44.4648853913587	17.0288864629003	40.434618142189	18.6644646332179	0.381608873070062	-1.38983337798484	0.421146216912892	-1.24760688821837	0.000182079469437816	0.041993559054898
ENSMUSG00000065094.1	Snord1a	chr11	116674598	116674671	+	86.4464249936455	76.9909166120237	86.3324094636416	26.5271639664955	39.5944663959532	29.1632259894029	83.2565836897702	31.7616187839505	86.3324094636416	29.1632259894029	0.380555425254362	-1.39382150734412	0.367899135229473	-1.44261780971977	9.49925056998477e-07	0.00132232960523677
ENSMUSG00000085511.1	RP23-28C17.1	chr11	118114855	118118279	+	179.864335873875	146.982658986591	143.130047268669	74.7583711783055	54.9213566137416	36.1624002268596	156.659014043045	55.2807093396355	146.982658986591	54.9213566137416	0.352985514211016	-1.50231911537034	0.376103614676604	-1.41079792291236	3.66040790877323e-08	0.000101908370757324
ENSMUSG00000031595.9	Pdgfrl	chr8	40926212	40990785	+	83.6578306390118	87.4896779682088	89.7402677319432	14.469362163543	42.1489480989179	34.9958711872835	86.9625921130546	30.5380604832481	87.4896779682088	34.9958711872835	0.350276085213391	-1.51343560209939	0.349047581296902	-1.51850438045218	3.56292087477094e-05	0.0140274714076714
ENSMUSG00000020889.11	Nr1d1	chr11	98767932	98775333	-	538.198710444309	414.117809049521	454.381102440219	276.123661287612	127.724085148236	85.1566198890565	468.89920731135	163.001455441635	454.381102440219	127.724085148236	0.347713391815567	-1.5240294628697	0.358732910691594	-1.47901798852825	1.93414683665812e-06	0.00215392117864067
ENSMUSG00000027398.13	Il1b	chr2	129364570	129371139	-	197.990199178994	144.649600907438	137.450283488166	77.169931538896	49.8123932078121	38.4954583060118	160.0300278582	55.1592610175733	144.649600907438	49.8123932078121	0.345280266336216	-1.53416021210765	0.381330198434975	-1.39088730888695	1.82295754619982e-07	0.000355267081391153
ENSMUSG00000056895.4	Hist3h2ba	chr11	58948920	58949533	+	556.324573749428	575.098816511025	661.124504050518	244.773376599936	228.626112415343	136.483897630406	597.515964770324	203.294462215228	575.098816511025	228.626112415343	0.340005845827639	-1.55636854360073	0.353494836676178	-1.50023895242999	4.42976249871853e-07	0.000719411887135633
ENSMUSG00000072675.12	Duxbl2	chr14	26118349	26129763	+	41.8289153195059	44.3281035038924	37.486440951318	15.6751423438382	12.7724085148236	12.8318194353373	41.2144865915721	13.7597900979997	41.8289153195059	12.8318194353373	0.334136840026749	-1.58148904009882	0.328954026010403	-1.60404212515607	0.000215254982517692	0.0466399321340328
ENSMUSG00000048502.14	Duxbl1	chr14	25978577	25990088	+	40.434618142189	50.160748701773	52.2538267806252	16.8809225241335	17.8813719207531	12.8318194353373	47.6163978748624	15.8647046267413	50.160748701773	16.8809225241335	0.33165630718164	-1.59223913269923	0.316277269325937	-1.66073822100848	0.000215388249073194	0.0466399321340328
ENSMUSG00000096263.1	Snord14c	chr9	40803583	40803668	+	73.8977503977937	59.4929810183819	86.3324094636416	21.7040432453145	22.9903353266825	25.6636388706746	73.2410469599391	23.4526724808905	73.8977503977937	22.9903353266825	0.320359521552513	-1.64223622474588	0.31736652813711	-1.65577811616924	2.79019143461903e-06	0.00270652745269096
ENSMUSG00000054128.16	H2-T3	chr17	36185572	36190287	-	96.2065052348635	132.984310511677	94.2840787563454	32.5560648679717	29.3765395840943	37.3289292664357	107.824964834295	33.0871779061673	96.2065052348635	32.5560648679717	0.307011841742519	-1.70363379208106	0.343918301838254	-1.5398622030159	1.16350751422488e-08	4.1227302165403e-05
ENSMUSG00000040483.15	Xaf1	chr11	72301629	72313733	+	2293.61885668624	2431.04651847663	2094.69688224941	892.277333418485	578.59010572151	542.436003402894	2273.12075247076	671.101147514296	2293.61885668624	578.59010572151	0.295240933043733	-1.76003534027323	0.292594885832028	-1.77302354157382	2.45446236954288e-08	7.35904459828252e-05
ENSMUSG00000028195.4	Cyr61	chr3	145646976	145649981	-	242.607708853134	563.433526115264	555.480897733167	154.339863077792	141.773734514542	103.821084522274	453.840710900522	133.311560704869	555.480897733167	141.773734514542	0.293211781465299	-1.76998502170186	0.23999306051548	-2.05893540448959	4.48261478078266e-09	1.94132084789517e-05
ENSMUSG00000080712.3	Hist3h2bb-ps	chr11	58954048	58954512	-	39.0403209648722	32.6628131081313	36.3504881952175	10.8520216226572	7.66344510889417	11.6652903957612	36.017874089407	10.0602523757709	36.3504881952175	10.8520216226572	0.280706575427777	-1.8328652361458	0.276757008647122	-1.85330824233432	0.000144423092594848	0.0370340715794038
ENSMUSG00000110170.1	RP23-313J14.7	chr11	116677483	116681290	-	138.035420554369	187.811175371755	113.595275610055	28.938724327086	42.1489480989179	48.9942196621969	146.480623845393	40.0272973627336	138.035420554369	42.1489480989179	0.273301017662416	-1.8714372630036	0.289978450472919	-1.78598240344376	0.000100402398782411	0.0289880318321631
ENSMUSG00000072718.6	Klra10	chr6	130269194	130281928	-	65.5319673338925	26.8301679102507	32.9426299269159	8.44046126206675	10.2179268118589	13.9983484749134	41.7682550570197	10.885578849613	32.9426299269159	10.2179268118589	0.263161377742013	-1.92598032400829	0.330440492266797	-1.59753760905895	0.000137773494009719	0.0355628971921644
ENSMUSG00000061462.17	Obscn	chr11	58994256	59136402	-	104.572288298765	136.483897630406	51.1178740245246	31.3502846876765	8.94068596037653	29.1632259894029	97.3913533178983	23.151398879152	104.572288298765	29.1632259894029	0.239068264630352	-2.06450546420683	0.221391338525633	-2.17532931409829	2.91644182499988e-06	0.00270652745269096
ENSMUSG00000057286.6	St6galnac2	chr11	116675303	116694868	-	464.300960046515	545.935590521623	361.232976439974	104.902875685687	89.4068596037653	130.651252432525	457.156509002704	108.320329240659	464.300960046515	104.902875685687	0.237020069718347	-2.07691887012149	0.233297663717532	-2.09975623488633	0.00015033712078274	0.0378044513338637
ENSMUSG00000096515.5	Igkv14-100	chr6	68519012	68519477	+	72.5034532204769	65.3256262162625	60.205496073329	28.938724327086	3.83172255444709	6.9991742374567	66.0115251700228	13.2565403729966	65.3256262162625	6.9991742374567	0.201562792976314	-2.31069874247102	0.202930169075003	-2.3009447323094	3.31284064847083e-05	0.0134504781203591
ENSMUSG00000087654.1	RP23-419P16.11	chr11	58889710	58891548	+	175.681444341925	289.299201814877	297.619622098343	30.1445045073812	48.5351523563297	39.661987345588	254.200089418382	39.447214736433	289.299201814877	39.661987345588	0.154567200071592	-2.69369389020741	0.136354384972259	-2.87456699877052	7.48492533185542e-21	1.45869967329864e-16
ENSMUSG00000076541.3	Igkv4-79	chr6	69042972	69043505	-	93.4179108802298	10.498761356185	18.1752440976088	4.823120721181	7.66344510889417	3.49958711872835	40.6973054446745	5.32871764960117	18.1752440976088	4.823120721181	0.131227508925657	-2.92985791433237	0.293185479159657	-1.77011444319983	0.000206775684113785	0.04605426194116
ENSMUSG00000009588.9	St6galnac1	chr11	116765025	116775507	-	37.6460237875553	60.6595100579581	18.1752440976088	3.61734054088575	1.27724085148236	4.66611615830447	38.8269259810407	3.18689918355753	37.6460237875553	3.61734054088575	0.0827168032136527	-3.59567575940391	0.0846543369770442	-3.56227220818665	0.000164255427255394	0.0402653068436068
ENSMUSG00000085882.1	RP23-192P17.5	chr11	59199836	59202385	-	218.904656838747	180.812001134298	230.598409488411	8.44046126206675	15.3268902177883	18.6644646332179	210.105022487152	14.1439387043577	218.904656838747	15.3268902177883	0.0674460821819228	-3.8901215476519	0.0646123244183728	-3.952046813069	6.0384464718201e-36	2.35360528132132e-31
ENSMUSG00000071470.4	Ccnb1ip1	chr14	50789248	50807732	-	1.39429717731686	95.6553812452416	113.595275610055	3.61734054088575	1.27724085148236	1.16652903957612	70.2149846775377	2.02037014398141	95.6553812452416	1.27724085148236	0.0287698868003592	-5.11929664519672	0.021121343281269	-5.56515459922613	0.000235611087986332	0.0485894887642501
ENSMUSG00000056032.12	RP23-468A19.2	chr11	116752167	116759373	+	7251.739619225	6088.11505754775	3547.58045730201	10.8520216226572	14.049649366306	8.16570327703282	5629.14504469159	11.0224580886653	6088.11505754775	10.8520216226572	0.00195745273103326	-8.99680681521846	0.00181048780853775	-9.10940582263471	7.06995996786336e-07	0.00110226331866964
ENSMUSG00000114759.1	RP23-79G18.5	chr13	100946405	100946815	-	2738.39965625032	2690.01596526252	2945.52549656872	3403.91744897349	3638.85918587325	3626.73878404215	2791.31370602719	3556.50513962963	2738.39965625032	3626.73878404215	1.27394880814031	0.349307306066774	1.29875313543515	0.377127232071759	6.14492571642595e-05	0.0206474801421667
ENSMUSG00000019948.4	Actr6	chr10	89711971	89732295	-	1026.20272250521	1086.03853584536	1137.08870885665	1380.61830643806	1408.79665918504	1375.33773766024	1083.10998906907	1388.25090109445	1086.03853584536	1380.61830643806	1.28080210390576	0.357047582807465	1.27827038845712	0.354193037244412	9.78279477113519e-05	0.0284555217757117
ENSMUSG00000026097.9	Ormdl1	chr1	53297095	53310309	+	2030.09669017335	1942.27085089423	2177.62143344475	2555.04820204563	2571.08583403399	2764.6738237954	2049.99632483744	2630.26928662501	2030.09669017335	2571.08583403399	1.28301855980712	0.359542040223405	1.29563744394875	0.373662067764546	9.15598593003755e-05	0.0272422033278682
ENSMUSG00000028271.9	Gtf2b	chr3	142765045	142783606	+	3340.7360368512	3174.12551668661	3635.04881952175	4497.56007250128	4407.75817846563	4170.34131648462	3383.30345768652	4358.55318915051	3340.7360368512	4407.75817846563	1.28810475077097	0.365249920527717	1.30466853444029	0.38368332061848	6.42787660755602e-05	0.0210537265993875
ENSMUSG00000020107.10	Anapc16	chr10	59987409	60003135	-	2644.98174537009	2607.19240345262	2738.78209495842	3484.70472105327	3423.00548197273	3394.5995051665	2663.65208126038	3434.10323606417	2644.98174537009	3423.00548197273	1.28918267557988	0.366456706275426	1.29834666801591	0.376675644855881	0.000133497669789756	0.0351739095375543
ENSMUSG00000030876.7	Mettl9	chr7	121034445	121078329	+	2249.0013470121	2026.26094174371	2263.95384290839	2750.38459125346	2738.40438557818	2944.31929589012	2179.73871055473	2811.03609090726	2249.0013470121	2750.38459125346	1.28988635302458	0.367243960880706	1.2499041384043	0.321817451405737	0.000119045502513233	0.0320002520790227
ENSMUSG00000022024.10	Sugt1	chr14	79587691	79635196	+	2699.35933528545	2743.67630108303	2898.9514335686	3812.67693009358	3410.23307345791	3598.74208709232	2780.66235664569	3607.21736354794	2743.67630108303	3598.74208709232	1.2971381021682	0.375332086919323	1.3147386818642	0.394776077203716	0.000107460001116757	0.0299176318823416
ENSMUSG00000080877.1	Rpl22-ps1	chrX	8038611	8038996	-	6659.16331886534	6517.39774411176	7261.0100169947	9415.9374279256	8358.26413210058	8874.9529330951	6812.52369332393	8883.05149770709	6659.16331886534	8874.9529330951	1.30389763374793	0.382830611071121	1.3339590985164	0.415714431685771	0.000225353482502292	0.0479506800579373
ENSMUSG00000037058.14	Paip2	chr18	35598617	35617186	+	11044.2279415269	11428.4850007272	12534.1027108134	14867.2696230404	15388.1977786595	15514.8362263624	11668.9385510225	15256.7678760208	11428.4850007272	15388.1977786595	1.307369272824	0.386666694940678	1.33497728483259	0.41681519409397	8.18278391485318e-06	0.00498344326014426
ENSMUSG00000022663.3	Atg3	chr16	45158785	45188538	+	2084.47428008871	1959.76878648788	2021.99590585897	2575.54646511065	2565.97687062806	2789.17093362649	2022.07965747852	2643.56475645507	2021.99590585897	2575.54646511065	1.30776197515623	0.387099980812625	1.30740361481199	0.386704591169462	6.60665554576415e-06	0.00422143628208605
ENSMUSG00000040331.16	Nsmce4a	chr7	130532526	130573118	-	4086.68502671572	3938.20203760897	4327.98000074308	5574.32177350494	5229.02404596879	5367.20011108971	4117.62235502259	5390.18197685448	4086.68502671572	5367.20011108971	1.30902915163482	0.388497225969703	1.31896193164324	0.399402925603804	0.000245384561379255	0.0498143440045793
ENSMUSG00000101939.1	RP23-8J15.5	chr1	24612775	24613119	-	21035.7615141795	18735.622904632	20628.9020507859	25833.8403628257	27972.8518883152	28099.3515053095	20133.4288231991	27302.0145854835	20628.9020507859	27972.8518883152	1.35608743147495	0.439450196828985	1.32348365018503	0.404340372436123	1.53483104695559e-06	0.00186947217866213
ENSMUSG00000100551.1	RP24-137J11.1	chr1	151520447	151520687	-	2403.76833369427	2547.69942243424	2848.96951230017	3812.67693009358	3392.35170153715	3385.26727284989	2600.14575614289	3530.09863482687	2547.69942243424	3392.35170153715	1.35723700197915	0.440672667495846	1.38560247874688	0.470513416061101	2.68461926339178e-05	0.0118837196995828
ENSMUSG00000064360.1	mt-Nd3	chrM	9459	9806	+	21164.0368544927	18693.6278592073	20910.6183342989	26248.6287448473	28152.9428483742	28296.4949129979	20256.0943493329	27566.0221687398	20910.6183342989	28152.9428483742	1.36090863910699	0.444570218692461	1.31827867201441	0.39865537507782	1.0666106865189e-06	0.00138577615761491
ENSMUSG00000016559.14	H3f3b	chr11	116021912	116027962	-	30901.8083408736	29509.685114157	33131.1980844285	42353.0288328706	46413.6553020175	38722.9314687292	31180.8971798197	42496.5385345391	30901.8083408736	42353.0288328706	1.36288761095386	0.446666596769092	1.37521202855722	0.459654068794197	0.000241454315011095	0.0495324465062496
ENSMUSG00000027962.14	Vcam1	chr3	116109949	116129688	-	6226.93119389711	6957.17919203196	6675.99434760291	9250.74554322516	8853.83358247573	9229.57776112623	6620.03491117733	9111.38562894237	6675.99434760291	9229.57776112623	1.37622328751742	0.460714561362648	1.36479828390117	0.448687737723686	5.11687992687234e-06	0.00369334497980932
ENSMUSG00000078789.9	Dph1	chr11	75177643	75191241	-	603.730677778202	613.594274817037	574.792094586877	817.518962240179	826.374830909088	829.402147138619	597.372349060705	824.431980095962	603.730677778202	826.374830909088	1.38046193414747	0.465151106561382	1.36556251063797	0.449495357108118	4.2334383076191e-06	0.00328694506952216
ENSMUSG00000012429.9	Mplkip	chr13	17695192	17699748	+	1583.92159343196	1606.31048749631	1665.3067404434	1949.74655153742	2224.95356328227	2537.20066107805	1618.51294045722	2237.30025863258	1606.31048749631	2224.95356328227	1.38227959963612	0.467049465371115	1.39281930613537	0.478008105712738	0.000187040999575213	0.0428841002379005
ENSMUSG00000074890.4	Lcmt2	chr2	121128307	121140653	-	468.483851578466	452.613267355533	408.942992196197	576.362926181129	651.392834256004	628.759152331527	443.346703710065	618.83830425622	452.613267355533	628.759152331527	1.39709428713908	0.482429388677046	1.36725621825424	0.451283623461634	4.98409412886484e-05	0.0178224804459417
ENSMUSG00000089999.1	AC122831.1	chr3	104752727	104753165	-	6961.7258063431	6415.90971766864	7298.49645794601	9196.48543511187	11059.6285329858	8632.31489286326	6892.04399398592	9629.47628698697	6961.7258063431	9196.48543511187	1.3971226520284	0.482458679090815	1.38320246370709	0.468012343768099	6.3183267235482e-05	0.0208702898901473
ENSMUSG00000074794.10	Arrdc3	chr13	80883384	80896042	+	888.167301950842	787.407101713879	838.333134002204	1064.70389920071	1347.48909831389	1105.86952951816	837.969179222308	1172.68750901092	838.333134002204	1105.86952951816	1.39962452959328	0.485039854352073	1.39883235130229	0.484223067264697	0.00014672367666211	0.0372643590041567
ENSMUSG00000105617.4	RP24-80F7.7	chr5	31596938	31701972	+	1175.39252047812	1282.01541449415	1290.44233093022	1827.9627533276	1797.07787803568	1640.13982964402	1249.2834219675	1755.0601536691	1282.01541449415	1797.07787803568	1.40426199929245	0.489812130668522	1.36898521954325	0.453106870403868	7.10320268773515e-05	0.0221489224927882
ENSMUSG00000000581.8	C1d	chr11	17257579	17269176	+	3562.42928804458	3493.75447353047	4357.5147724017	5399.48364736213	5048.93308590978	5598.17286092578	3804.56617799225	5348.8631980659	3562.42928804458	5399.48364736213	1.40572150288393	0.49131080052285	1.50146508620299	0.586370928076924	2.44150287915605e-05	0.0115287518808157
ENSMUSG00000020621.6	Rdh14	chr12	10390772	10395562	+	665.079753580143	730.247178774649	748.59286627026	1050.23453703716	970.703047126595	1014.88026443122	714.639932875018	1011.93928286499	730.247178774649	1014.88026443122	1.41500261907424	0.500804723390667	1.38574897963046	0.470665945324602	1.17030797570507e-05	0.00670810205427302
ENSMUSG00000105195.1	RP24-503L4.2	chr3	104753123	104773270	-	2685.41636351228	2648.02091983778	3062.52863044707	3551.02263096951	4733.45459559363	3687.3982941001	2798.65530459905	3990.62517355442	2685.41636351228	3687.3982941001	1.42559443053947	0.511563605714911	1.48603591896455	0.571468987670424	0.000117735895214069	0.0318679999149915
ENSMUSG00000025512.15	Chid1	chr7	141493136	141539857	-	685.994211239896	761.743462843204	778.127637928875	1122.58134785488	1113.75402249262	1006.71456115419	741.955104003992	1081.0166438339	761.743462843204	1113.75402249262	1.45581261803621	0.541824673924671	1.41913478298719	0.505011616539335	2.71352606219788e-05	0.0118837196995828
ENSMUSG00000043572.7	Pars2	chr4	106651069	106655282	+	290.013812881907	302.131021250214	330.562252025259	443.727106348652	499.401172929603	426.949628484859	307.569028719127	456.692635921038	302.131021250214	443.727106348652	1.48218447727755	0.567725021118924	1.51157148323019	0.596049206595892	1.73824362140434e-05	0.00915561103128068
ENSMUSG00000041396.13	Mettl18	chr1	163994889	163997243	+	327.659836669463	282.30002757742	320.338677220354	420.817282923042	484.074282711815	474.777319107479	310.099513822412	459.889628247446	320.338677220354	474.777319107479	1.48416858074731	0.569654971200596	1.43563565985227	0.521689663912409	2.39073104897089e-05	0.0115041387772517
ENSMUSG00000012483.4	Rpa3	chr6	8255936	8259173	-	2193.22945991943	2315.56014355859	2775.13258315364	3611.31163998427	3669.51296630883	3577.74456437995	2427.97406221055	3619.52305689102	2315.56014355859	3611.31163998427	1.49043016739314	0.575728780887095	1.5631306606135	0.644438376891959	0.000173054151756514	0.0413811759080591
ENSMUSG00000014177.10	Tvp23b	chr11	62879455	62916780	+	941.150594688882	989.216625560547	1129.13703956394	1486.72696230404	1528.85729922439	1568.98155822988	1019.83475327112	1528.1886065861	989.216625560547	1528.85729922439	1.49771954330023	0.582767496045863	1.54484727318462	0.627464217346251	1.3522763788659e-05	0.00732051061375779
ENSMUSG00000030291.12	Med21	chr6	146642547	146650732	+	1331.5538043376	1360.17286014575	1689.16174832151	2306.65748490481	2171.30944752002	2096.25268411828	1460.29613760162	2191.4065388477	1360.17286014575	2171.30944752002	1.49986201986939	0.584829785783611	1.61112355867245	0.688067140008759	1.8017631152954e-06	0.00212810063469299
ENSMUSG00000031532.6	Saraf	chr8	34154575	34170821	+	6426.31569025342	6790.36553937257	7087.20924531131	11884.16945699	9654.66359635517	8947.27773354882	6767.96349164577	10162.0369289647	6790.36553937257	9654.66359635517	1.50140513227549	0.586313319703868	1.49653753837583	0.581628467108271	4.30084918145651e-06	0.00328694506952216
ENSMUSG00000082099.1	RP23-348N2.2	chr11	17095490	17095644	-	2296.40745104087	2809.00192729929	2930.75811073941	4449.32886528947	3385.96549727974	4233.33388462173	2678.72249635986	4022.87608239698	2809.00192729929	4233.33388462173	1.50146010831294	0.586366145022522	1.43213717416875	0.51816968465172	4.44699250594049e-05	0.0163944973339229
ENSMUSG00000078580.3	RP24-443B5.2	chr7	127389673	127393629	-	172.892849987291	202.976052886244	210.151259878601	288.181463090565	314.201249464661	282.30002757742	195.340054250712	294.894246710882	202.976052886244	288.181463090565	1.5048688627776	0.589637773188673	1.45285240557985	0.538888147875395	9.44352248989539e-05	0.0278848618248979
ENSMUSG00000052033.13	Pfdn4	chr2	170496428	170519123	+	1076.39742088862	1307.67905336483	1312.02543329613	1976.27371550391	1849.44475294646	1757.95926264121	1232.03396918319	1861.22591036386	1307.67905336483	1849.44475294646	1.50938554730589	0.593961365268647	1.42330482817988	0.509244675924145	3.1900093820284e-07	0.000565168162196913
ENSMUSG00000044867.5	Gimap1os	chr6	48738346	48741444	-	563.296059636013	696.417836626942	747.45691351416	976.681946039152	1024.34716288885	1056.87530985596	669.056936592371	1019.30147292799	696.417836626942	1024.34716288885	1.52172168591752	0.605704522400967	1.46363493196113	0.549555753398063	5.33191901730989e-05	0.0183913457997954
ENSMUSG00000058331.15	Zfp85	chr13	67747800	67755228	-	536.804413266992	548.268648600775	587.287574903983	753.612612684531	853.196888790218	962.386457650296	557.453545590583	856.398653041682	548.268648600775	853.196888790218	1.53591598722082	0.619099304513031	1.56200551541161	0.643399547617494	4.2906316842972e-05	0.0162365001125099
ENSMUSG00000110569.1	RP23-162M13.9	chr8	71704205	71704968	-	1383.14279989833	1296.01376296907	1438.11618922329	2148.70028128614	2210.90391391597	2006.42994807092	1372.4242506969	2122.01138109101	1383.14279989833	2148.70028128614	1.54608557331466	0.62862017228998	1.53419544333889	0.617482281520805	1.91398877471172e-06	0.00215392117864067
ENSMUSG00000085903.1	RP23-480M17.3	chr16	95900398	95901728	+	1275.78191724493	1314.67822760228	1548.30360656505	2117.34999659846	2224.95356328227	2144.0803747409	1379.58791713742	2162.12797820721	1314.67822760228	2144.0803747409	1.56625823962663	0.647322099163875	1.64460621071554	0.717742182222943	2.91795349336965e-09	1.42166341638836e-05
ENSMUSG00000038268.4	Ovca2	chr11	75175942	75178835	-	861.675655581821	919.22488318598	851.96456707541	1405.93969022426	1393.46976896726	1335.67575031465	877.621701947737	1378.36173650206	861.675655581821	1393.46976896726	1.57029271777844	0.651033516520882	1.59962942851317	0.677737727883256	1.87836194805716e-08	6.10107613745199e-05
ENSMUSG00000075330.4	RP23-238F5.3	chr16	19876567	19884274	-	1295.30207772737	1497.82328681573	1920.89611056602	2690.0955822387	2623.45270894477	2119.5832649098	1571.34049170304	2477.71051869776	1497.82328681573	2623.45270894477	1.57596682748039	0.656237167831591	1.6542075026522	0.726140216534925	0.000112519913824528	0.0308851315573144
ENSMUSG00000084235.2	AC121548.2	chr5	22528321	22529244	-	4952.5435738295	6247.92953596968	6523.77667828544	11130.5568443055	8282.90692186312	8732.63639026681	5908.08326269487	9382.03338547846	6247.92953596968	8732.63639026681	1.58783863597289	0.667064306114131	1.50162279063257	0.586522451713946	6.82231339438329e-05	0.0217961728830227
ENSMUSG00000043190.14	Rfesd	chr13	76001535	76018719	-	425.260639081643	425.783099445283	493.003496147637	688.500482948588	780.394160255723	667.254610637539	448.015744891521	712.049751280616	425.783099445283	688.500482948588	1.58787863205504	0.667100645715236	1.67232976651325	0.74185936033951	9.0778120688054e-06	0.00533167002855739
ENSMUSG00000020513.15	Tubd1	chr11	86544991	86567360	+	260.733572158253	310.296724527247	371.456551244879	442.521326168357	542.827361880004	523.771538769676	314.16228264346	503.040075606012	310.296724527247	523.771538769676	1.59706220406915	0.675420505456967	1.62115818777146	0.697024871594937	2.16086881139992e-05	0.010661289071131
ENSMUSG00000000031.16	H19	chr7	142575529	142578143	-	256.550680626303	187.811175371755	229.46245673231	340.03001084326	348.686752454685	389.620699218423	224.608104243456	359.445820838789	229.46245673231	348.686752454685	1.60406488965556	0.681732504692283	1.56646898127704	0.647516202201242	6.91484334532716e-05	0.0218980716091882
ENSMUSG00000019122.8	Ccl9	chr11	83572919	83578636	-	384.826020939454	443.281035038924	351.009401635069	742.760591061874	556.87701124631	603.095513460852	393.038819204482	634.244371923012	384.826020939454	603.095513460852	1.61386458926594	0.690519534879676	1.64813275977198	0.720832458631784	0.000136537973400625	0.0355628971921644
ENSMUSG00000093769.4	Hist2h3c1	chr3	96246685	96248509	+	191.01871329241	234.472336954799	209.015307122501	319.531747778241	335.914343939861	382.621524980966	211.502119123237	346.02253889969	209.015307122501	335.914343939861	1.63386784085164	0.708291292505048	1.65548898625348	0.727257412709944	1.24858796972402e-05	0.00695231618513331
ENSMUSG00000067199.4	Frat1	chr19	41829970	41832583	+	383.431723762137	533.103771086285	513.450645757447	868.16172981258	730.581767047911	772.242224199389	476.662046868623	790.328573686627	513.450645757447	772.242224199389	1.65582445853049	0.727549734291766	1.53924935184516	0.622226961055859	3.40041188871842e-05	0.0135242708353651
ENSMUSG00000078861.8	Zfp931	chr2	178067695	178078476	-	234.241925789233	290.465730854453	240.821984293316	387.055437874775	378.063292038779	503.940545096882	255.176546979001	423.019758336812	240.821984293316	387.055437874775	1.65712837340109	0.728685368700174	1.75656620211875	0.812757950410896	3.06624642899012e-05	0.0128508695766396
ENSMUSG00000034855.13	Cxcl10	chr5	92346638	92348889	-	559.113168104062	765.243049961932	462.332771732923	938.096980269704	1121.41746760151	909.892650869371	595.562996599639	989.802366246863	559.113168104062	938.096980269704	1.66141466560916	0.732412194526135	1.77030773502126	0.82400016776538	7.88432024085953e-05	0.0240083710959361
ENSMUSG00000047342.17	Zfp286	chr11	62752577	62789462	-	436.415016500178	447.947151197229	529.353984342855	768.081974848074	834.038276017982	752.411230526595	471.238717346754	784.843827130884	447.947151197229	768.081974848074	1.66431069189836	0.734924779524976	1.75209022991491	0.809077073397331	5.12909234798395e-05	0.0181742393133973
ENSMUSG00000094220.5	Trav6-3	chr14	53428711	53430377	+	128.275340313151	132.984310511677	134.042425219865	277.329441467907	217.130944752002	195.976878648788	131.767358681564	230.145754956232	132.984310511677	217.130944752002	1.74550673838285	0.803645926305024	1.73062336504744	0.791291785651612	5.78438112967928e-05	0.0196050281123052
ENSMUSG00000031584.16	Gsr	chr8	33652523	33698163	+	976.008024121804	874.896779682088	826.973606441198	1847.25523621232	1427.95527195728	1410.33360884753	892.626136748363	1561.84803900571	874.896779682088	1427.95527195728	1.75085280384471	0.808057799882461	1.78517977809135	0.836069369436801	6.98614505969156e-09	2.72298975991598e-05
ENSMUSG00000033777.4	Tlr13	chrX	106143204	106160493	+	89.2350193482792	99.1549683639699	131.770519707663	174.838126142811	185.199923464942	205.309110965397	106.720169139971	188.449053524383	99.1549683639699	185.199923464942	1.75984411086762	0.815447638840474	1.90055079068393	0.926417580574099	0.000205987296518319	0.04605426194116
ENSMUSG00000059552.13	Trp53	chr11	69580359	69591873	+	1447.2804700549	1976.10019304194	2148.08666178613	3241.13712463363	3560.94749393282	3076.13707736222	1857.15577496099	3292.74056530956	1976.10019304194	3241.13712463363	1.77185527725644	0.825260771324598	1.66628219404241	0.736632749724836	4.55378762120517e-08	0.000118328653407809
ENSMUSG00000031239.5	Itm2a	chrX	107397099	107403376	-	3848.26020939454	6161.60638704105	6864.5625051156	10929.1915541961	9731.29804744411	9682.19102848177	5624.80970051706	10114.2268767073	6161.60638704105	9731.29804744411	1.79781693514931	0.846246124190356	1.64149188399624	0.715007616833027	6.11046668152118e-06	0.00422143628208605
ENSMUSG00000082740.1	RP23-369H9.2	chr2	150469411	150470165	-	389.008912471405	400.119460574608	657.716645782217	876.602191074646	940.049266691018	876.063308721664	482.281672942743	897.571588829109	400.119460574608	876.602191074646	1.85920189116241	0.894683441351447	2.2432590195441	1.1655962118807	0.000105504811252701	0.029646870268782
ENSMUSG00000089718.1	RP23-152P11.3	chr9	112227579	112228242	+	98.9950995894972	142.316542828286	149.945763805272	265.271639664955	256.725411147955	209.975227123701	130.419135407685	243.990759312204	142.316542828286	256.725411147955	1.8626003207232	0.897318132051103	1.71442303518147	0.777723139470784	4.4371132717869e-05	0.0163944973339229
ENSMUSG00000032487.8	Ptgs2	chr1	150100031	150108227	+	184.047227405826	352.291769951987	203.335543341998	453.373347791014	411.27155417732	528.437654927981	246.55818023327	464.360852298772	203.335543341998	453.373347791014	1.88048500699654	0.91110480389592	2.28371707507007	1.19138392930135	6.48271947259768e-05	0.02105641307362
ENSMUSG00000060183.6	Cxcl11	chr5	92359544	92365485	-	47.4061040287733	66.4921552558387	59.0695433172284	118.166457668934	100.902027267107	116.652903957612	57.6559342006135	111.907129631218	59.0695433172284	116.652903957612	1.93354673960209	0.951249639092116	1.89449796539359	0.921815590457259	0.000179639832342403	0.0419270763186219
ENSMUSG00000067750.3	Khdc1a	chr1	21349641	21352200	+	149.189797972904	142.316542828286	207.8793543664	336.412670302375	274.606783068708	365.123589387325	166.461898389197	325.381014252802	149.189797972904	336.412670302375	1.9523719671854	0.965227942291402	2.18098702909899	1.12498118991896	1.28651195122507e-05	0.00706258821449289
ENSMUSG00000096827.2	Trav14n-1	chr14	53166626	53167178	+	66.9262645112094	107.320671641003	112.459322853954	157.957203618678	186.477164316425	219.30745944031	95.5687530020554	187.913942458471	107.320671641003	186.477164316425	1.95503397715328	0.967193680803514	1.75095757029046	0.808144124392145	2.38652824443585e-05	0.0115041387772517
ENSMUSG00000048766.6	Skint10	chr4	112711147	112774866	-	425.260639081643	825.902560019891	665.66831507492	1397.49922896219	950.267193502877	1406.8340217288	638.943838058818	1251.53348139796	665.66831507492	1397.49922896219	1.95704166983141	0.968674474523279	1.88011574691985	0.910821482310876	2.84647444772579e-05	0.0121919818185723
ENSMUSG00000095854.4	Trav14d-1	chr14	52855614	52856166	+	76.6863447524274	95.6553812452416	115.867181122256	166.397664880744	194.140609425319	207.642169044549	96.0696357066416	189.393481116871	95.6553812452416	194.140609425319	1.96205504802308	0.972365518823112	1.9799563668175	0.985468637340423	5.53839626251935e-06	0.00392491038407667
ENSMUSG00000100017.2	RP23-170I24.2	chr14	56811989	56813899	+	73.8977503977937	65.3256262162625	55.6616850489268	155.545643258087	99.6247864156242	125.985136274221	64.9616872209943	127.051855315977	65.3256262162625	125.985136274221	1.96388702679292	0.973711940562266	1.94490068714179	0.959696488462836	0.00023541754188225	0.0485894887642501
ENSMUSG00000105703.2	RP24-378G4.3	chr14	54292443	54297456	-	1045.72288298765	1004.38150307504	1217.74135453979	1450.55355689519	1900.53438700575	3072.63749024349	1089.28191353416	2141.24181138148	1045.72288298765	1900.53438700575	1.96574083921001	0.975073131123041	2.04761877760952	1.03394714168218	4.82307941374539e-05	0.0174064042879217
ENSMUSG00000056071.12	S100a9	chr3	90692632	90695721	-	920.236137029129	502.774016057306	620.230204830899	1314.30039652182	1711.50274098636	1172.361684774	681.080119305778	1399.38827409406	620.230204830899	1314.30039652182	2.05608062868309	1.03989684056313	2.25624012373856	1.17392061689085	8.15420135457547e-05	0.0246376981548285
ENSMUSG00000035299.16	Mid1	chrX	169685199	170005736	+	257.94497780362	326.628131081313	324.882488244756	541.395300952567	719.08659938457	620.593449054494	303.151865709896	627.025116463877	324.882488244756	620.593449054494	2.06323429700987	1.04490766026516	1.93000589182725	0.948605251688684	1.61146473518474e-11	1.25620121966591e-07
ENSMUSG00000036412.5	Arsi	chr18	60911780	60918561	+	2106.78303492578	1657.63776523766	1872.0501420537	3327.95329761489	4089.72520644652	4217.00247806766	1878.82364740571	3878.22699404302	1872.0501420537	4089.72520644652	2.06447987390212	1.04577835410957	2.07164696442825	1.05077816998211	1.11554534922497e-06	0.00140260035731425
ENSMUSG00000031780.2	Ccl17	chr8	94810453	94812036	+	85.0521278163286	142.316542828286	144.266000024769	296.621924352631	265.666097108331	227.473162717343	123.878223556461	263.253728059435	142.316542828286	265.666097108331	2.11400821826643	1.07998098524906	1.84977601920156	0.887350592065968	2.13947569466534e-06	0.00225379308516138
ENSMUSG00000054162.15	Spock3	chr8	62951009	63357103	+	48.8004012060902	82.8235618099043	78.3807401709377	154.339863077792	131.555807702683	172.646297857265	70.0015677289774	152.847322879247	78.3807401709377	154.339863077792	2.17044080538949	1.11798807638689	1.95006225439959	0.963520181759458	6.40017873692861e-06	0.00422143628208605
ENSMUSG00000093953.2	Trav3d-3	chr14	52972448	52973038	+	51.5889955607239	45.4946325434685	34.0785826830164	74.7583711783055	113.67443578193	102.654555482698	43.7207369290696	97.0291208143113	45.4946325434685	102.654555482698	2.23046467482432	1.15734429948592	2.13275974306647	1.09272145418802	2.61775012070127e-05	0.0117278214315602
ENSMUSG00000048442.15	Smim5	chr11	115899966	115906269	+	177.075741519242	131.817781472101	221.510787439607	469.048490134852	445.757057167344	286.966143735725	176.801436810316	400.590563679307	177.075741519242	445.757057167344	2.26461401897996	1.17926517814973	2.26225546335367	1.17776185368815	4.01083142997e-05	0.0154782353114793
ENSMUSG00000056054.9	S100a8	chr3	90668978	90670035	+	593.970597536984	380.288466901814	512.314693001347	1070.73280010218	1235.09190338344	1067.37407121215	495.524585813381	1124.39959156592	512.314693001347	1070.73280010218	2.27077350437813	1.18318381330756	2.19474398631578	1.1340526613033	1.15178337241549e-07	0.000264076826509638
ENSMUSG00000040809.10	Chil3	chr3	106147554	106167564	-	118.515260071933	97.9884393243938	86.3324094636416	200.159509929011	275.88402392019	234.472336954799	100.94536961999	236.838623601334	97.9884393243938	234.472336954799	2.3549225683854	1.23567962372641	2.4170057736839	1.27322091938201	8.53962874147941e-10	4.75498727795204e-06
ENSMUSG00000025936.15	RP23-278E1.2	chr1	21285246	21298312	-	37.6460237875553	58.3264519788058	74.9728819026361	160.368763979268	125.169603445271	130.651252432525	56.9817858896657	138.729873285688	58.3264519788058	130.651252432525	2.41998506537045	1.27499814411868	2.37850698232251	1.25005626046844	6.68685986133522e-05	0.0215399782491953
ENSMUSG00000040808.4	S100g	chrX	162961992	162964599	-	52.9832927380408	96.8219102848177	76.1088346587366	225.480893715212	157.10062473233	184.311588253026	75.3046792271984	188.96436890019	76.1088346587366	184.311588253026	2.49685149558895	1.32011001712172	2.48281779306548	1.31197839011475	3.76536793175022e-07	0.000638098895112298
ENSMUSG00000090173.8	Fbxw10	chr11	62847069	62877465	+	178.470038696558	215.807872321582	222.646740195707	541.395300952567	667.996965325275	568.099642273569	205.641550404616	592.49730285047	215.807872321582	568.099642273569	2.87912297707259	1.52562941259834	2.74548512283913	1.45706109366631	4.16832387953404e-06	0.00328694506952216
ENSMUSG00000035448.9	Ccr3	chr9	124021972	124031689	+	26.4916463690204	12.8318194353373	22.7190551220109	84.4046126206675	70.2482468315299	37.3289292664357	20.6808403087895	63.9939295728777	22.7190551220109	70.2482468315299	3.11025871394802	1.63703458993979	2.81675136704424	1.49403222350589	0.000147233273126206	0.0372643590041567
ENSMUSG00000072844.6	RP23-154O12.1	chrX	169975043	169978917	-	15.3372689504855	24.4971098310984	18.1752440976088	86.816172981258	63.8620425741181	39.661987345588	19.3365409597309	63.4467343003213	18.1752440976088	63.8620425741181	3.26103137490962	1.70532832155518	3.49083258302256	1.80357116828143	2.45500270956641e-05	0.0115287518808157
ENSMUSG00000076556.3	Igkv4-57	chr6	69575975	69576500	-	40.434618142189	36.1624002268596	57.9335905611279	57.877448654172	172.427514950119	235.638865994376	44.8435363100588	155.314609866222	40.434618142189	172.427514950119	3.45912828279291	1.79040851747418	3.84112963105168	1.9415306529915	8.74851378167188e-05	0.0262300632052481
ENSMUSG00000096850.1	Gm21748	chrY	90838869	90839177	-	5.57718870926745	10.498761356185	10.2235748049049	37.3791855891527	37.0399846929885	23.3305807915223	8.76650829011914	32.5832503578879	10.2235748049049	37.0399846929885	3.65708789819282	1.87069530230491	3.18707017649596	1.67223078634766	0.000105617261343274	0.029646870268782
ENSMUSG00000095562.7	Gm21887	chrX	170009659	170019281	+	342.997105619948	521.438480690524	738.369291465355	3475.05847961091	2067.85293854994	2389.05147305189	534.268292591943	2643.98763040425	521.438480690524	2389.05147305189	4.94419741631908	2.30573634960522	5.07056484765548	2.34214646863309	1.14133440358316e-15	1.48285970161536e-11
ENSMUSG00000096768.7	Gm47283	chrY	90784738	90816464	+	496.369795124803	759.410404764052	1137.08870885665	5400.68942754242	3292.72691512153	3343.27222742515	797.622969581834	4012.22952336303	759.410404764052	3343.27222742515	5.02722715616966	2.32976287894285	5.28334810557359	2.40145246831158	2.78589406301763e-14	2.71464482235595e-10
ENSMUSG00000076575.6	Igkv7-33	chr6	70058632	70059199	-	1.39429717731686	1.16652903957612	1.13595275610055	1.20578018029525	80.4661736433888	25.6636388706746	1.23225965766451	35.7785308981195	1.16652903957612	25.6636388706746	29.1426911237355	4.86506220123978	30.6709303277356	4.93880002278524	0.000179347133503686	0.0419270763186219
