# Supplementary material for: Oncogenic and teratogenic effects of Trp53Y217C, an inflammation-prone mouse model of the human hotspot mutant TP53Y220C
Source: eLife. 2025 Apr 14;13:RP102434. doi: 10.7554/eLife.102434 (PMC11996178; doi:10.7554/eLife.102434)
Supplement: Supplementary file 3. [file elife-102434-supp3.xlsx]

## Sheet: Feuil1
		Ccl17	Ccl9	Ccr3	Cxcl10	S100a8	S100a9
GO term	Description
GO:0071621	granulocyte chemotaxis	x	x	x	x	x	x
GO:0097530	granulocyte migration	x	x	x	x	x	x
GO:0030593	neutrophil chemotaxis	x	x		x	x	x
GO:0006935	chemotaxis	x	x	x	x	x	x
GO:0042330	taxis	x	x	x	x	x	x
GO:0097529	myeloid leukocyte migration	x	x	x	x	x	x
GO:1990266	neutrophil migration	x	x		x	x	x
GO:0030595	leukocyte chemotaxis	x	x	x	x	x	x
GO:0060326	cell chemotaxis	x	x	x	x	x	x
GO:0006954	inflammatory response	x	x	x	x	x	x
GO:0050900	leukocyte migration	x	x	x	x	x	x
GO:0070488	neutrophil aggregation					x	x
GO:0070486	leukocyte aggregation					x	x
GO:0070098	chemokine-mediated signaling pathway	x	x		x
GO:0007159	leukocyte cell-cell adhesion					x	x
GO:0016477	cell migration	x	x	x	x	x	x
