# Supplementary material for: Oncogenic and teratogenic effects of Trp53Y217C, an inflammation-prone mouse model of the human hotspot mutant TP53Y220C
Source: eLife. 2025 Apr 14;13:RP102434. doi: 10.7554/eLife.102434 (PMC11996178; doi:10.7554/eLife.102434)
Supplement: Supplementary file 4. — Due to the gavage of pregnant mothers, all the pups born in this experiment were exposed to supformin in utero (SIU+). [file elife-102434-supp4.xlsx]

## Sheet: Feuil1
at weaning
F Trp53+/YC x M Trp53YC/YC	Nbr. Females (SIU+)	Nbr. Males (SIU+)	Sex ratio (f/m)	Total
Trp53+/YC	26	17	1.53	59
Trp53YC/YC	3	13	0.23
